# Supplementary material for: A practical synthesis of benzothiophenes via visible-light-promoted cyclization of disulfides and alkynes
Source: Royal Society of Chemistry journal article supplement (doi:10.1039/c6ob02461k), 2016-12-02

# **A practical synthesis of benzothiophenes via visible-light-promoted cyclization of disulfides and alkynes**

Lin-miao Ye,<sup>a</sup> Lu Qian,<sup>a</sup> Yan-yan Chen,<sup>b</sup> Xue-jing Zhang,<sup>a</sup> Ming Yan<sup>a\*</sup>

<sup>a</sup>Institute of Drug Synthesis and Pharmaceutical Process, School of Pharmaceutical Sciences,

Sun Yat-sen University, Guangzhou 510006, China.

<sup>b</sup>College of Pharmacy, Guilin Medical University, Guilin 541004, China.

## **Supporting Information**

|                                                      |           |
|------------------------------------------------------|-----------|
| <b>1. General Information.....</b>                   | <b>2</b>  |
| <b>2. General Procedures.....</b>                    | <b>2</b>  |
| <b>3. Experiments of Reaction Mechanism.....</b>     | <b>6</b>  |
| <b>4. Characterization Data of the Products.....</b> | <b>7</b>  |
| <b>5. Reference.....</b>                             | <b>19</b> |
| <b>6. NMR Spectra.....</b>                           | <b>20</b> |

## 1. General Information

$^1\text{H}$  NMR and  $^{13}\text{C}$  NMR spectra were recorded on Bruker AVANCE 400 spectrometer. Chemical shifts of protons are reported in parts per million downfield from tetramethylsilane and are referenced to residual protium in the NMR solvent ( $\text{CDCl}_3$ ;  $\delta$  7.26). Chemical shifts of carbon are referenced to the carbon resonances of the solvent ( $\text{CDCl}_3$ ;  $\delta$  77.0). Peaks are labeled as single (s), broad singlet (br), doublet (d), triplet (t), double doublet (dd), doublet of triplets (dt), multiplet (m). Melting points were measured on a WRS-2A melting point apparatus and are uncorrected. All products were further characterized by HRMS (high resolution mass spectra). Copies of their  $^1\text{H}$  NMR and  $^{13}\text{C}$  NMR spectra were provided. GC spectra were taken on an Agilent-6890A instrument. THF was dried and redistilled according to standard methods.

## 2. General Procedures

### Preparation of aryl disulfides **1c**, **1e**, **1i**, **1l**, **1m**<sup>1</sup>

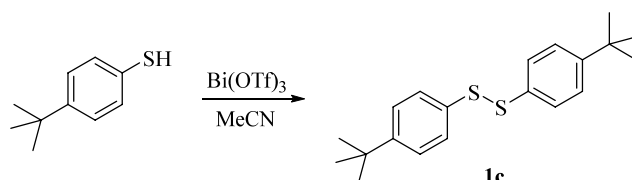

To a 25 mL round-bottom flask was added 4-(*tert*-butyl)benzenethiol (0.5 g, 3 mmol),  $\text{Bi}(\text{OTf})_3$  (10 mg, 0.015 mmol) and  $\text{MeCN}$  (10 mL). The reaction mixture was stirred at room temperature for 4 hours. Then the solvent was removed and the crude product was purified by column chromatography on silica gel (petroleum ether) to give the product **1c** (0.92 g, 92 %).

### Preparation of alkynes (**2e**, **2f**, **2g**, **2j**, **2k**)

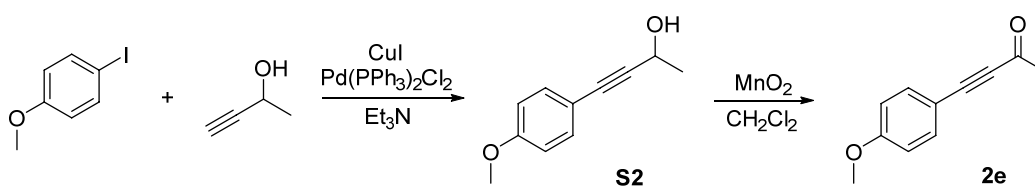

Compound **S2** was synthesized according to a known procedure.<sup>2</sup> To a round bottom flask was

added Pd(PPh<sub>3</sub>)<sub>2</sub>Cl<sub>2</sub> (35 mg, 0.05 mmol) and CuI (19 mg, 0.1 mmol). The flask was purged with N<sub>2</sub> for 5 minutes. Et<sub>3</sub>N (30 mL) was added *via* cannula under N<sub>2</sub> atmosphere. 1-Iodo-4-methoxybenzene (1.07 g, 5 mmol) was added, and then but-3-yn-2-ol (0.39 g, 5.5 mmol) was added. The reaction mixture was stirred at room temperature until the reaction was completed. The crude mixture was filtered and the solid residue was washed with Et<sub>3</sub>N. The combined organics were concentrated under reduced pressure. The residue was purified by column chromatography over silica gel (petroleum ether/ethyl acetate = 4/1) to give the product **S2** (0.8 g, 91%).

Compound **2e** was synthesized according to a known procedure.<sup>3</sup> To a solution of aryl propargyl alcohols **S2** (0.8 g, 4.5 mmol) in CH<sub>2</sub>Cl<sub>2</sub> (20 mL) was added MnO<sub>2</sub> (3.95 g, 45 mmol) at room temperature. The resulting mixture was stirred overnight. Then the solid was filtered, and the solvent was removed under reduced pressure. The residue was purified by column chromatography over silica gel (petroleum ether/ethyl acetate = 20/1) to give the product **4e** (0.7 g, 89%).

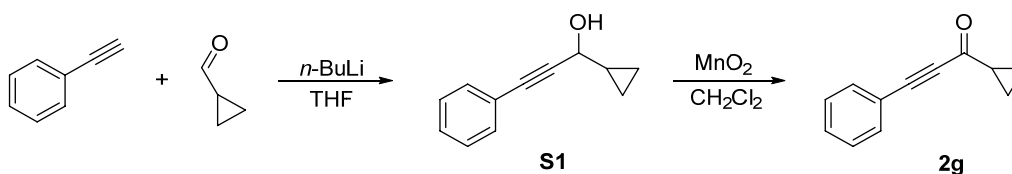

Compound **S1** was synthesized according to a known procedure.<sup>4</sup> To a solution of acetylene (1.02 g, 10 mmol) in anhydrous THF (20 mL) was added *n*-BuLi (10 mmol, 2.4 M in hexane) at 0 °C under an Argon atmosphere. The resulting solution was stirred at that temperature for 1 h. Then cyclopropanecarbaldehyde (0.35 g, 5 mmol) in anhydrous THF (15 mL) was added by a syringe. The reaction mixture was stirred for 12 h at room temperature. The mixture was then quenched by adding saturated aqueous NH<sub>4</sub>Cl (20 mL) and extracted with diethyl ether (20 mL × 2). The combined organic layer was dried over MgSO<sub>4</sub> and concentrated under vacuum to give the crude product, which was purified by column chromatography on silica gel (petroleum ether/ethyl acetate = 4/1) to give the product **S1** (0.75g, 87%).

Compound **2g** was synthesized according to a known procedure.<sup>3</sup> To a solution of aryl propargyl alcohols **S1** (0.75g, 4.4 mmol) in CH<sub>2</sub>Cl<sub>2</sub> (20 mL) was added MnO<sub>2</sub> (3.79 g, 44

mmol) at room temperature. The resulting mixture was stirred overnight. Then the solid was filtered, and the solvent was removed under reduced pressure. The residue was purified by column chromatography over silica gel (petroleum ether/ethyl acetate = 20/1) to give the product **2g** (0.64g, 86%).

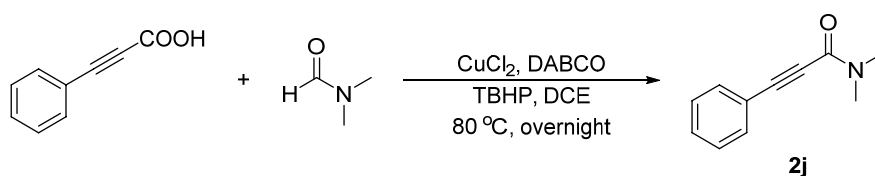

Compound **2j** was synthesized according to a known procedure.<sup>5</sup> To a solution of 3-phenylpropionic acid (0.44 g, 3 mmol), CuCl<sub>2</sub> (20.2 mg, 0.15 mmol) and DABCO (33.7 mg, 0.3 mmol) in DCE (10 mL) was added DMF (3.29 g, 45 mol) and TBHP (70% in water, 6 mmol). The flask was filled with argon, and the mixture was stirred at 80 °C (oil bath temperature) until the complete consumption of the starting material as monitored by TLC. Then the mixture was washed with brine. The aqueous phase was extracted with ethyl acetate. The combined organic layer was dried with Na<sub>2</sub>SO<sub>4</sub> and concentrated in vacuo. The residue was purified by column chromatography over silica gel (petroleum ether/ethyl acetate = 1/1) to give the product **2j** (0.21 g, 40%).

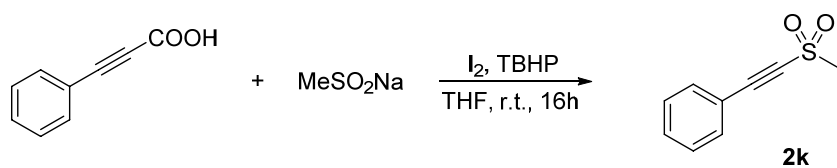

Compound **2k** was synthesized according to a known procedure.<sup>6</sup> To a solution of 3-phenylpropionic acid (0.73 g, 5 mmol), sodium methylsulfonate (1.03 g, 10 mmol) and iodine (0.64 g, 2.5 mmol) in THF (30 mL) was added TBHP (70% in water, 15 mmol). The resulting mixture was stirred at room temperature for 24 h. The reaction mixture was quenched by the addition of saturated aqueous Na<sub>2</sub>S<sub>2</sub>O<sub>3</sub> (30 mL). The reaction mixture was extracted with EtOAc (3 × 40 mL). The combined organic layer was washed with H<sub>2</sub>O (50 mL) and brine (50 mL), and dried over MgSO<sub>4</sub>. The organic layer was filtered and concentrated under vacuum. The residue was purified by column chromatography over silica

gel (petroleum ether/ethyl acetate = 15/1) to give the product **2k** (0.15g, 17%).

### Preparation of the benzothiophene **3a**

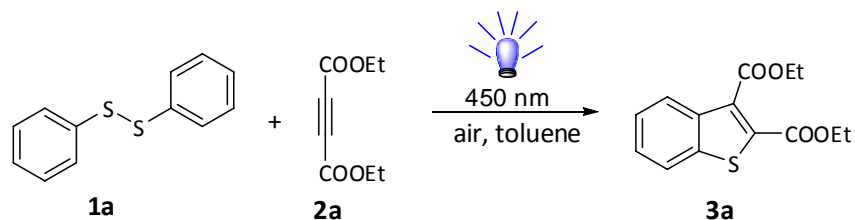

To a 20 mL glass tube with a stir bar was charged disulfides **1a** (43.7 mg, 0.2 mmol), alkynes **2a** (85.1 mg, 0.5 mmol) and toluene (2 mL). The solution was stirred at room temperature with the irradiation of a 12 W blue LED for 24 h. The solvent was removed under vacuum. The residue was purified by column chromatography over silica gel (petroleum ether/ethyl acetate = 25/1) to give the product **3a** (75 mg, 68%).

### Preparation of the benzothiophene **3a** under sunlight irradiation

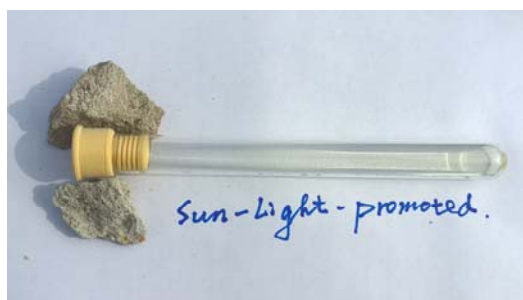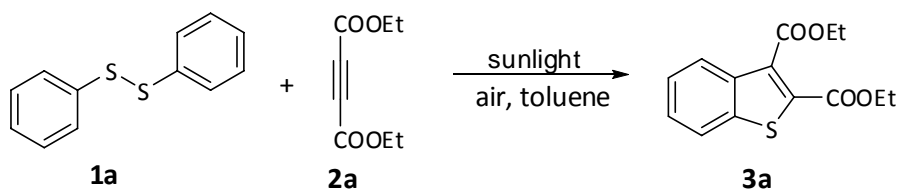

To a 20 mL glass tube was charged disulfides **1a** (43.7 mg, 0.2 mmol), alkynes **2a** (85.1 mg, 0.5 mmol) and toluene (2 mL). The solution was irradiated under sun-light for 27 h (9 h per day for 3 days, from 9:00 to 18:00 each day). The solvent was removed under vacuum. The residue was purified by column chromatography over silica gel (petroleum ether/ethyl acetate = 25/1) to give the product **3a** (66 mg, 60%) as a white solid. (2016/08/07 – 2016/08/09. Guangzhou, Guangdong province, China. temperature: 26 °C - 36 °C)

### 3. Experiments of Reaction Mechanism

#### Radical trapping experiment

To a 20 mL glass tube with a stir bar was charged **1a** (43.7 mg, 0.2 mmol), **2a** (85.1 mg, 0.5 mmol), TEMPO (62.5mg, 0.4 mmol) and toluene (2 mL). The solution was stirred at room temperature with the irradiation of a 12 W blue LED lamp. After 24 h, the reaction mixture was detected by GC-MS.

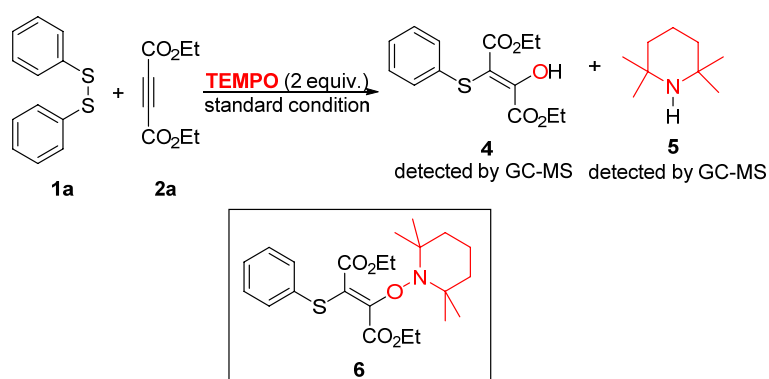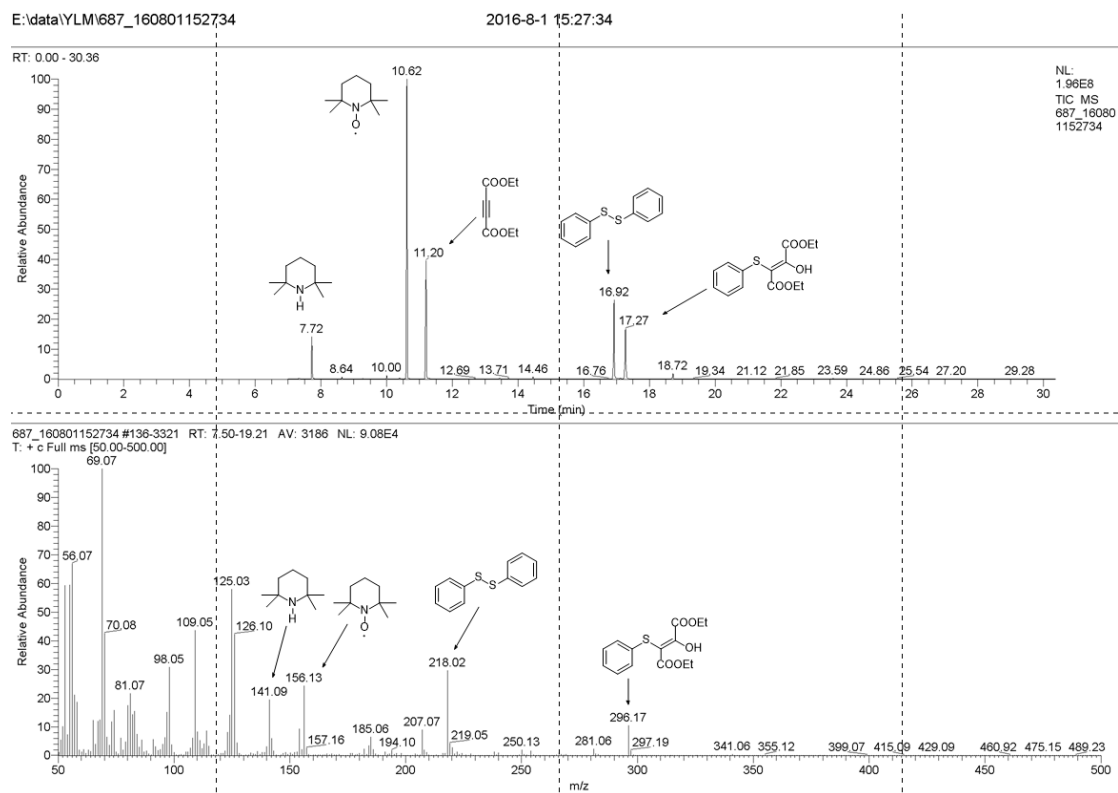

## 4. Characterization Data

### 1,2-Bis(4-(*tert*-butyl)phenyl)disulfane (1c)

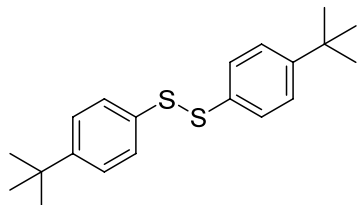

$^1\text{H NMR}$  (400 MHz,  $\text{CDCl}_3$ ):  $\delta$  7.45–7.41 (m, 4H), 7.33–7.29 (m, 4H), 1.29 (s, 18H).  $^{13}\text{C NMR}$  (100 MHz,  $\text{CDCl}_3$ ):  $\delta$  150.6, 134.1, 127.9, 126.1, 34.6, 31.3. Analytical data matches literature data.<sup>7</sup>

### 1,2-Di-*o*-tolyl)disulfane (1e)

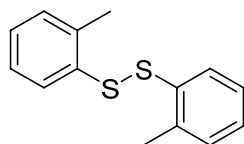

$^1\text{H NMR}$  (400 MHz,  $\text{CDCl}_3$ ):  $\delta$  7.53–7.49 (m, 2H), 7.17–7.09 (m, 6H), 2.42 (s, 6H).  $^{13}\text{C NMR}$  (100 MHz,  $\text{CDCl}_3$ ):  $\delta$  137.6, 135.5, 130.3, 128.9, 127.4, 126.7, 20.0. Analytical data matches literature data.<sup>7</sup>

### 1,2-Bis(4-bromophenyl)disulfane (1i)

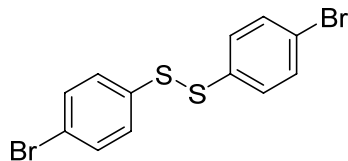

$^1\text{H NMR}$  (400 MHz,  $\text{CDCl}_3$ ):  $\delta$  7.44–7.39 (m, 4H), 7.35–7.30 (m, 4H).  $^{13}\text{C NMR}$  (100 MHz,  $\text{CDCl}_3$ ):  $\delta$  135.8, 132.2, 129.5, 121.6. Analytical data matches literature data.<sup>7</sup>

### 1,2-Di(naphthalen-2-yl)disulfane (1l)

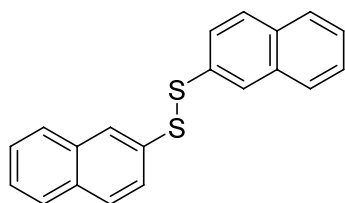

**<sup>1</sup>H NMR** (400 MHz, CDCl<sub>3</sub>): δ 7.97 (d, *J* = 1.5 Hz, 1H), 7.79–7.74 (m, 2H), 7.72–7.70 (m, 1H), 7.61 (dd, *J* = 8.7, 1.9 Hz, 1H), 7.47–7.39 (m, 2H). **<sup>13</sup>C NMR** (100 MHz, CDCl<sub>3</sub>): δ 134.3, 133.5, 132.6, 129.0, 127.8, 127.5, 126.8, 126.7, 126.3, 125.7. Analytical data matches literature data.<sup>8</sup>

**1,2-Di(naphthalen-1-yl)disulfane (1m).**

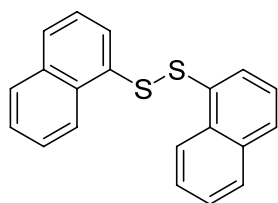

**<sup>1</sup>H NMR** (400 MHz, CDCl<sub>3</sub>): δ 8.36–8.30 (m, 2H), 7.86–7.80 (m, 2H), 7.77 (d, *J* = 8.2 Hz, 2H), 7.61 (dd, *J* = 7.2, 1.1 Hz, 2H), 7.51–7.45 (m, 4H), 7.30–7.28 (m, 2H). **<sup>13</sup>C NMR** (100 MHz, CDCl<sub>3</sub>): δ 134.2, 133.6, 132.9, 130.4, 129.3, 128.6, 126.7, 126.4, 125.5, 125.2. Analytical data matches literature data.<sup>8</sup>

**4-(4-Methoxyphenyl)but-3-yn-2-one (2e)**

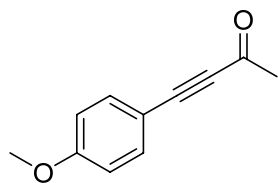

**<sup>1</sup>H NMR** (400 MHz, CDCl<sub>3</sub>): δ 7.54–7.50 (m, 2H), 6.91–6.87 (m, 2H), 3.84 (s, 3H), 2.43 (s, 3H). **<sup>13</sup>C NMR** (100 MHz, CDCl<sub>3</sub>): δ 184.5, 161.7, 135.1, 114.4, 111.8, 91.5, 88.3, 55.4, 32.6. HRMS (ESI): calculated for C<sub>11</sub>H<sub>11</sub>O<sub>2</sub> (M+H)<sup>+</sup>: 175.0754, found: 175.0753.

**4-(Pyridin-3-yl)but-3-yn-2-one (2f)**



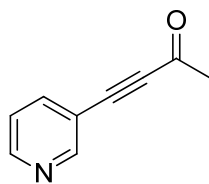

**<sup>1</sup>H NMR** (400 MHz, CDCl<sub>3</sub>): δ 8.80 (dd, *J* = 2.0, 0.8 Hz, 1H), 8.66 (dd, *J* = 4.9, 1.9 Hz, 1H), 7.86 (dt, *J* = 7.9, 1.9 Hz, 1H), 7.34 (ddd, *J* = 7.9, 4.9, 0.8 Hz, 1H), 2.48 (s, 3H). **<sup>13</sup>C NMR** (100 MHz, CDCl<sub>3</sub>): δ 183.9, 153.3, 150.7, 139.8, 123.2, 117.3, 90.7, 86.1, 32.6. HRMS (ESI): calculated for C<sub>9</sub>H<sub>8</sub>NO (M+H)<sup>+</sup>: 146.0600, found: 146.0593.

### 1-Cyclopropyl-3-phenylprop-2-yn-1-one (2g)

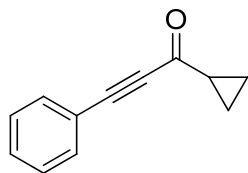

Light yellow liquid. **<sup>1</sup>H NMR** (400 MHz, CDCl<sub>3</sub>): δ 7.58–7.53 (m, 2H), 7.47–7.42 (m, 1H), 7.3 (m, 2H), 2.19–2.13 (m, 1H), 1.35–1.29 (m, 2H), 1.11–1.06 (m, 2H). **<sup>13</sup>C NMR** (100 MHz, CDCl<sub>3</sub>): δ 188.2, 132.9, 130.6, 128.6, 120.06, 90.4, 86.2, 24.6, 11.1. HRMS (ESI): calculated for C<sub>12</sub>H<sub>11</sub>O (M+H)<sup>+</sup>: 171.0804, found: 171.0800.

### *N,N*-dimethyl-3-phenylpropiolamide (2j)

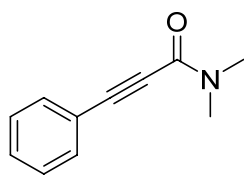

**<sup>1</sup>H NMR** (400 MHz, CDCl<sub>3</sub>): δ 7.56–7.52 (m, 2H), 7.42–7.33 (m, 3H), 3.29 (s, 3H), 3.03 (s, 3H). **<sup>13</sup>C NMR** (100 MHz, CDCl<sub>3</sub>): δ 154.6, 132.3, 129.9, 128.5, 120.7, 90.2, 81.6, 38.3, 34.2. Analytical data matches literature data.<sup>5</sup>

### ((Methylsulfonyl)ethynyl)benzene (2k)

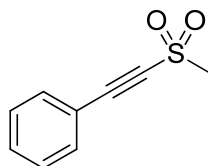

$^1\text{H NMR}$  (400 MHz,  $\text{CDCl}_3$ ):  $\delta$  7.62–7.57 (m, 2H), 7.55–7.50 (m, 1H), 7.45–7.39 (m, 2H), 3.30 (s, 3H).  $^{13}\text{C NMR}$  (100 MHz,  $\text{CDCl}_3$ ):  $\delta$  132.9, 131.7, 128.8, 117.6, 91.5, 84.6, 46.9. Analytical data matches literature data.<sup>6</sup>

### Diethyl benzo[b]thiophene-2,3-dicarboxylate (3a)

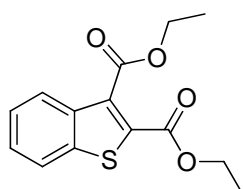

White solid, M.p. 68–70 °C.  $^1\text{H NMR}$  (400 MHz,  $\text{CDCl}_3$ ):  $\delta$  7.95–7.92 (m, 1H), 7.86–7.83 (m, 1H), 7.51–7.43 (m, 2H), 4.50 (q,  $J = 7.1$  Hz, 2H), 4.41 (q,  $J = 7.1$  Hz, 2H), 1.46–1.38 (m, 6H).  $^{13}\text{C NMR}$  (100 MHz,  $\text{CDCl}_3$ ):  $\delta$  164.4, 161.8, 140.3, 136.9, 133.6, 133.2, 127.3, 125.5, 124.4, 122.5, 62.1, 61.9, 14.1. **HRMS** (ESI): calculated for  $\text{C}_{14}\text{H}_{15}\text{O}_4\text{S}$  ( $\text{M}+\text{H}$ )<sup>+</sup>: 279.0686, found: 279.0673.

### Diethyl 5-methylbenzo[b]thiophene-2,3-dicarboxylate (3b).

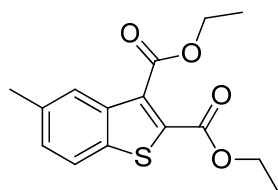

Colourless oil.  $^1\text{H NMR}$  (400 MHz,  $\text{CDCl}_3$ ):  $\delta$  7.71 (d,  $J = 8.2$  Hz, 2H), 7.30 (d,  $J = 8.4$  Hz, 1H), 4.50 (q,  $J = 7.1$  Hz, 2H), 4.39 (q,  $J = 7.1$  Hz, 2H), 2.47 (s, 3H), 1.45–1.37 (m, 6H).  $^{13}\text{C NMR}$  (100 MHz,  $\text{CDCl}_3$ ):  $\delta$  164.7, 161.8, 137.7, 137.2, 135.6, 133.4, 133.0, 129.3, 124.0, 122.1, 62.0, 61.9, 21.4, 14.1. **HRMS** (ESI): calculated for  $\text{C}_{15}\text{H}_{17}\text{O}_4\text{S}$  ( $\text{M}+\text{H}$ )<sup>+</sup>: 293.0842, found: 293.0830.

### Diethyl 5-(*tert*-butyl)benzo[*b*]thiophene-2,3-dicarboxylate (3c)

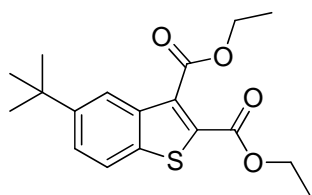

Colourless oil.  $^1\text{H NMR}$  (400 MHz,  $\text{CDCl}_3$ ):  $\delta$  7.88 (d,  $J = 1.8$  Hz, 1H), 7.76 (d,  $J = 8.6$  Hz, 1H), 7.57 (dd,  $J = 8.6, 1.8$  Hz, 1H), 4.51 (q,  $J = 7.1$  Hz, 2H), 4.40 (q,  $J = 7.1$  Hz, 2H), 1.47–1.36 (m, 15H).  $^{13}\text{C NMR}$  (100 MHz,  $\text{CDCl}_3$ ):  $\delta$  164.7, 161.9, 149.0, 137.8, 137.0, 133.5, 133.4, 126.1, 122.0, 120.1, 62.0, 61.8, 34.9, 31.4, 14.19, 14.15. **HRMS** (ESI): calculated for  $\text{C}_{18}\text{H}_{23}\text{O}_4\text{S}$  ( $\text{M}+\text{H}$ ) $^+$ : 335.1312, found: 335.1296.

### Diethyl 5-methoxybenzo[*b*]thiophene-2,3-dicarboxylate (3d)

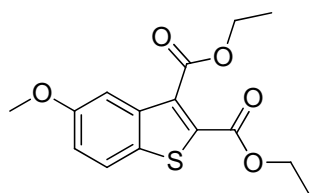

White solid. M.p. 58–60 °C.  $^1\text{H NMR}$  (400 MHz,  $\text{CDCl}_3$ ):  $\delta$  7.71 (d,  $J = 8.9$  Hz, 1H), 7.39 (d,  $J = 2.4$  Hz, 1H), 7.15 (dd,  $J = 8.9, 2.4$  Hz, 1H), 4.51 (q,  $J = 7.1$  Hz, 2H), 4.42 (q,  $J = 7.1$  Hz, 2H), 1.47–1.39 (m, 6H).  $^{13}\text{C NMR}$  (100 MHz,  $\text{CDCl}_3$ ):  $\delta$  164.5, 161.9, 158.4, 138.0, 135.0, 132.9, 132.3, 123.2, 118.6, 105.4, 62.0, 61.8, 55.5, 14.13, 14.12. **HRMS** (ESI): calculated for  $\text{C}_{15}\text{H}_{17}\text{O}_5\text{S}$  ( $\text{M}+\text{H}$ ) $^+$ : 309.0791, found: 309.0797.

### Diethyl 7-methylbenzo[*b*]thiophene-2,3-dicarboxylate (3e)

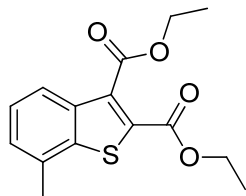

White solid. M.p. 72–73 °C.  $^1\text{H NMR}$  (400 MHz,  $\text{CDCl}_3$ ):  $\delta$  7.77 (d,  $J = 8.1$  Hz, 1H), 7.40–7.36 (m, 1H), 7.27 (d,  $J = 8.1$  Hz, 1H), 4.49 (q,  $J = 7.1$  Hz, 2H), 4.41 (q,  $J = 7.1$  Hz, 2H), 2.56 (s, 3H), 1.45–1.38 (m, 6H).  $^{13}\text{C NMR}$  (100 MHz,  $\text{CDCl}_3$ ):  $\delta$  164.6, 161.9, 140.7, 136.8,

134.2, 132.8, 132.1, 127.4, 126.1, 122.1, 62.0, 61.9, 20.0, 14.2. **HRMS** (ESI): calculated for  $C_{15}H_{17}O_4S$  (M+H)<sup>+</sup>: 293.0842, found: 293.0831.

### Diethyl 5-hydroxybenzo[b]thiophene-2,3-dicarboxylate (3f)

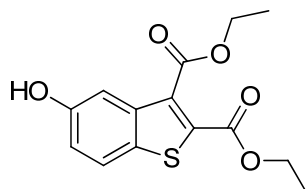

White solid. M.p. 101–103 °C. **<sup>1</sup>H NMR** (400 MHz, CDCl<sub>3</sub>): δ 7.65 (d, *J* = 8.8 Hz, 1H), 7.40 (d, *J* = 2.2 Hz, 1H), 7.07 (dd, *J* = 8.8, 2.2 Hz, 1H), 6.42 (br, 1H), 4.48–4.37 (m, 4H), 1.42–1.37 (m, 6H). **<sup>13</sup>C NMR** (100 MHz, CDCl<sub>3</sub>): δ 165.0, 162.0, 154.6, 138.1, 135.3, 132.6, 131.7, 123.4, 118.2, 108.7, 62.23, 62.16, 14.12, 14.05. **HRMS** (ESI): calculated for  $C_{14}H_{15}O_5S$  (M+H)<sup>+</sup>: 295.0635, found: 295.0623.

### Diethyl 5-fluorobenzo[b]thiophene-2,3-dicarboxylate (3g)

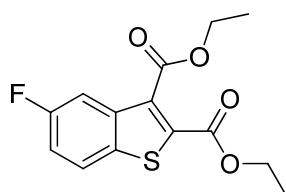

White solid. M.p. 103–104 °C. **<sup>1</sup>H NMR** (400 MHz, CDCl<sub>3</sub>): δ 7.78 (dd, *J* = 8.9, 4.7 Hz, 1H), 7.67 (dd, *J* = 9.4, 2.5 Hz, 1H), 7.28–7.22 (m, 1H), 4.49 (q, *J* = 7.1 Hz, 2H), 4.41 (q, *J* = 7.1 Hz, 2H), 1.46–1.38 (m, 6H). **<sup>13</sup>C NMR** (100 MHz, CDCl<sub>3</sub>): δ 163.8, 162.5, 161.6, 160.1, 138.0, 137.9, 136.8, 135.5, 132.1, 132.0, 123.9, 123.8, 116.7, 116.4, 110.2, 109.9, 62.3, 62.0, 14.1. **HRMS** (ESI): calculated for  $C_{14}H_{14}FO_4S$  (M+H)<sup>+</sup>: 297.0591, found: 297.0583.

### Diethyl 5-chlorobenzo[b]thiophene-2,3-dicarboxylate (3h)

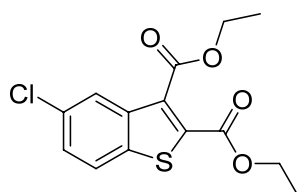

White solid. M.p. 66–68 °C.  $^1\text{H NMR}$  (400 MHz,  $\text{CDCl}_3$ ):  $\delta$  7.96 (d,  $J = 2.0$  Hz, 1H), 7.76 (d,  $J = 8.7$  Hz, 1H), 7.44 (dd,  $J = 8.7, 2.0$  Hz, 1H), 4.49 (q,  $J = 7.1$  Hz, 2H), 4.41 (q,  $J = 7.1$  Hz, 2H), 1.45–1.38 (m, 6H).  $^{13}\text{C NMR}$  (100 MHz,  $\text{CDCl}_3$ ):  $\delta$  163.7, 161.5, 138.1, 137.9, 136.2, 132.1, 131.9, 127.9, 124.1, 123.5, 62.3, 62.1, 14.1. **HRMS** (ESI): calculated for  $\text{C}_{14}\text{H}_{14}\text{ClO}_4\text{S}$  ( $\text{M}+\text{H}$ ) $^+$ : 313.0296, found: 313.0285.

### Diethyl 5-bromobenzo[b]thiophene-2,3-dicarboxylate (3i)

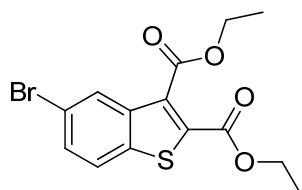

White solid. M.p. 84–85 °C.  $^1\text{H NMR}$  (400 MHz,  $\text{CDCl}_3$ ):  $\delta$  8.12 (dd,  $J = 1.9, 0.4$  Hz, 1H), 7.69 (dd,  $J = 8.7, 0.4$  Hz, 1H), 7.56 (dd,  $J = 8.7, 1.9$  Hz, 1H), 4.49 (q,  $J = 7.1$  Hz, 2H), 4.41 (q,  $J = 7.1$  Hz, 2H), 1.45–1.38 (m, 6H).  $^{13}\text{C NMR}$  (100 MHz,  $\text{CDCl}_3$ ):  $\delta$  163.7, 161.4, 138.6, 138.3, 135.8, 131.8, 130.4, 127.2, 123.8, 119.8, 62.3, 62.1, 14.1. **HRMS** (ESI): calculated for  $\text{C}_{14}\text{H}_{14}\text{BrO}_4\text{S}$  ( $\text{M}+\text{H}$ ) $^+$ : 356.9791, found: 356.9783.

### Diethyl 5-nitrobenzo[b]thiophene-2,3-dicarboxylate (3j)

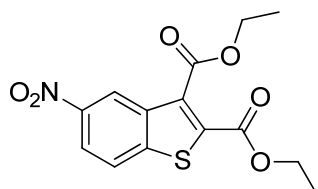

Pale yellow solid. M.p. 58–59 °C.  $^1\text{H NMR}$  (400 MHz,  $\text{CDCl}_3$ ):  $\delta$  8.90 (d,  $J = 2.2$  Hz, 1H), 8.33 (dd,  $J = 9.0, 2.2$  Hz, 1H), 7.99 (d,  $J = 9.0$  Hz, 1H), 4.54 (q,  $J = 7.1$  Hz, 2H), 4.45 (q,  $J = 7.1$  Hz, 2H), 1.48–1.40 (m, 6H).  $^{13}\text{C NMR}$  (100 MHz,  $\text{CDCl}_3$ ):  $\delta$  163.0, 161.0, 146.4, 145.1, 138.90, 136.8, 133.0, 123.4, 121.3, 120.6, 62.7, 62.5, 14.1. **HRMS** (ESI): calculated for  $\text{C}_{14}\text{H}_{14}\text{NO}_6\text{S}$  ( $\text{M}+\text{H}$ ) $^+$ : 324.0237, found: 324.0241.

### Diethyl 4,6-dichlorobenzo[b]thiophene-2,3-dicarboxylate (3k)

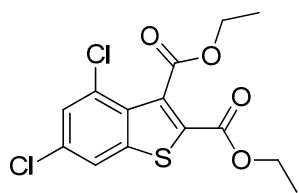

White solid. M.p. 83–84 °C. **<sup>1</sup>H NMR** (400 MHz, CDCl<sub>3</sub>): δ 7.74 (d, *J* = 1.8 Hz, 1H), 7.43 (d, *J* = 1.8 Hz, 1H), 4.50 (q, *J* = 7.2 Hz, 2H), 4.40 (q, *J* = 7.2 Hz, 2H), 1.44 (t, *J* = 7.2 Hz, 3H), 1.39 (t, *J* = 7.2 Hz, 3H). **<sup>13</sup>C NMR** (100 MHz, CDCl<sub>3</sub>): δ 165.0, 160.8, 143.1, 134.2, 133.7, 132.4, 132.3, 130.4, 127.1, 121.0, 62.5, 62.4, 14.1, 13.9. **HRMS** (ESI): calculated for C<sub>14</sub>H<sub>13</sub>Cl<sub>2</sub>O<sub>4</sub>S (M+H)<sup>+</sup>: 346.9906, found: 346.9905.

### Diethyl naphtho[2,1-b]thiophene-1,2-dicarboxylate (3l)

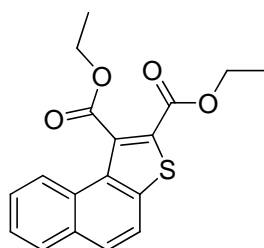

White solid. M.p. 129–130 °C. **<sup>1</sup>H NMR** (400 MHz, CDCl<sub>3</sub>): δ 8.20–8.15 (m, 1H), 7.96–7.92 (m, 1H), 7.85 (d, *J* = 8.8 Hz, 1H), 7.80 (d, *J* = 8.8 Hz, 1H), 7.63–7.54 (m, 2H), 4.65 (q, *J* = 7.1 Hz, 2H), 4.42 (q, *J* = 7.1 Hz, 2H), 1.50 (t, *J* = 7.1 Hz, 3H), 1.42 (t, *J* = 7.1 Hz, 3H). **<sup>13</sup>C NMR** (100 MHz, CDCl<sub>3</sub>): δ 167.6, 161.6, 140.8, 135.8, 131.7, 131.6, 129.9, 129.2, 129.1, 127.5, 126.1, 122.9, 120.2, 62.6, 61.9, 14.2, 14.0. **HRMS** (ESI): calculated for C<sub>18</sub>H<sub>17</sub>O<sub>4</sub>S (M+H)<sup>+</sup>: 329.0842, found: 329.0840.

### Diethyl naphtho[1,2-b]thiophene-2,3-dicarboxylate (3m)

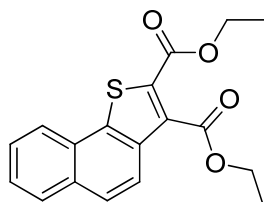

Red solid, M.p. 87–88 °C. **<sup>1</sup>H NMR** (400 MHz, CDCl<sub>3</sub>): δ 7.46 (d, *J* = 7.8 Hz, 1H), 7.28 (dd, *J* = 7.8, 0.8 Hz, 1H), 7.21–7.12 (m, 2H), 7.01 (dd, *J* = 7.4, 1.1 Hz, 1H), 6.85 (dd, *J* = 7.4, 1.1 Hz, 1H), 4.42 (q, *J* = 7.2 Hz, 2H), 4.30 (q, *J* = 7.2 Hz, 2H), 1.37 (dt, *J* = 18.1, 7.2 Hz, 6H). **<sup>13</sup>C NMR** (100 MHz, CDCl<sub>3</sub>): δ 167.3, 161.8, 136.6, 135.5, 130.8, 129.8, 129.63, 129.61,

127.1, 126.7, 124.43, 124.38, 123.1, 120.1, 62.5, 62.0, 14.00, 13.95. **HRMS** (ESI): calculated for  $C_{18}H_{17}O_4S$  ( $M+H$ )<sup>+</sup>: 329.0842, found: 329.0826.

**Diethyl thieno[2,3-b]thiophene-2,3-dicarboxylate (3n)**

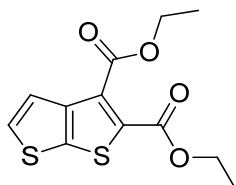

Light brown liquid. **<sup>1</sup>H NMR** (400 MHz,  $CDCl_3$ ):  $\delta$  7.44 (d,  $J = 5.3$  Hz, 1H), 7.34 (d,  $J = 5.3$  Hz, 1H), 4.46 (q,  $J = 7.1$  Hz, 2H), 4.38 (q,  $J = 7.1$  Hz, 2H), 1.40 (m, 6H). **<sup>13</sup>C NMR** (100 MHz,  $CDCl_3$ ):  $\delta$  163.8, 161.1, 145.4, 140.7, 136.5, 129.9, 129.7, 120.5, 61.90, 61.85, 14.2, 14.1. **HRMS** (ESI): calculated for  $C_{12}H_{13}O_4S_2$  ( $M+H$ )<sup>+</sup>: 285.0250, found: 285.0237.

**Methyl 5-methoxy-3-phenylbenzo[b]thiophene-2-carboxylate (4b)**

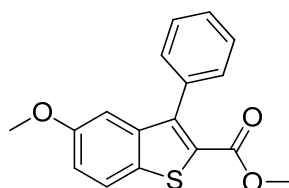

Colorless liquid. **<sup>1</sup>H NMR** (400 MHz,  $CDCl_3$ ):  $\delta$  7.73 (d,  $J = 8.8$  Hz, 1H), 7.51–7.43 (m, 3H), 7.40 (d,  $J = 7.8$  Hz, 2H), 7.13 (dd,  $J = 8.8, 2.2$  Hz, 1H), 6.93 (d,  $J = 2.1$  Hz, 1H), 3.76 (s, 3H), 3.73 (s, 3H). **<sup>13</sup>C NMR** (100 MHz,  $CDCl_3$ ):  $\delta$  163.0, 157.9, 143.8, 141.1, 134.7, 133.1, 129.6, 129.0, 128.2, 128.1, 123.3, 118.3, 106.4, 55.5, 52.2. **HRMS** (ESI): calculated for  $C_{17}H_{15}O_3S$  ( $M+H$ )<sup>+</sup>: 299.0736, found: 299.0736.

**Ethyl 5-methoxy-3-phenylbenzo[b]thiophene-2-carboxylate (4c)**

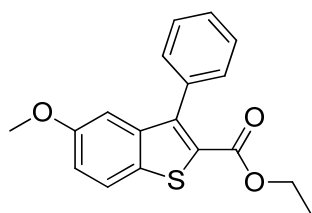

Colorless liquid. **<sup>1</sup>H NMR** (400 MHz,  $CDCl_3$ ):  $\delta$  7.73 (d,  $J = 8.8$  Hz, 1H), 7.51–7.43 (m, 3H), 7.41–7.36 (m, 2H), 7.12 (dd,  $J = 8.8, 2.5$  Hz, 1H), 6.92 (d,  $J = 2.5$  Hz, 1H), 4.21 (q,  $J = 7.1$

Hz, 2H), 3.73 (s, 3H), 1.17 (t,  $J = 7.1$  Hz, 3H).  $^{13}\text{C}$  NMR (100 MHz,  $\text{CDCl}_3$ ):  $\delta$  162.6, 157.9, 143.3, 141.2, 135.0, 133.1, 129.9, 129.6, 128.1, 128.0, 123.2, 118.1, 106.5, 61.2, 55.5, 13.9. HRMS (ESI,  $m/z$ ): calculated for  $[\text{M}+\text{H}]^+$ : 295.0635, found: 295.0623. HRMS (ESI): calculated for  $\text{C}_{18}\text{H}_{17}\text{O}_3\text{S}$  ( $\text{M}+\text{H}$ ) $^+$ : 313.0893, found: 313.0889. Analytical data matches literature data.<sup>9</sup>

#### 1-(5-Methoxy-3-phenylbenzo[b]thiophen-2-yl)ethan-1-one (4d)

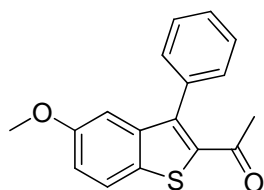

Pale yellow liquid.  $^1\text{H}$  NMR (400 MHz,  $\text{CDCl}_3$ ):  $\delta$  7.74 (d,  $J = 8.8$  Hz, 1H), 7.56–7.49 (m, 3H), 7.40–7.38 (m, 2H), 7.12 (dd,  $J = 8.8, 2.5$  Hz, 1H), 6.80 (d,  $J = 2.5$  Hz, 1H), 3.72 (s, 3H), 2.07 (s, 3H).  $^{13}\text{C}$  NMR (100 MHz,  $\text{CDCl}_3$ ):  $\delta$  193.6, 157.9, 142.0, 141.8, 141.6, 135.3, 133.4, 129.7, 128.9, 128.7, 123.4, 118.4, 106.8, 55.5, 29.6. HRMS (ESI): calculated for  $\text{C}_{17}\text{H}_{15}\text{O}_2\text{S}$  ( $\text{M}+\text{H}$ ) $^+$ : 283.0787, found: 283.0781.

#### 1-(5-Methoxy-3-(4-methoxyphenyl)benzo[b]thiophen-2-yl)ethan-1-one (4e)

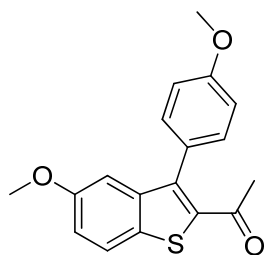

White solid. M.p. 133–135 °C.  $^1\text{H}$  NMR (400 MHz,  $\text{CDCl}_3$ ):  $\delta$  7.73 (d,  $J = 8.8$  Hz, 1H), 7.33–7.29 (m, 2H), 7.12 (dd,  $J = 8.8, 2.5$  Hz, 1H), 7.09–7.04 (m, 2H), 6.84 (d,  $J = 2.5$  Hz, 1H), 3.91 (s, 3H), 3.74 (s, 3H), 2.10 (s, 3H).  $^{13}\text{C}$  NMR (100 MHz,  $\text{CDCl}_3$ ):  $\delta$  193.8, 160.0, 157.9, 142.2, 141.8, 141.6, 133.4, 130.9, 127.2, 123.4, 118.4, 114.4, 106.8, 55.5, 55.4, 29.7. HRMS (ESI): calculated for  $\text{C}_{18}\text{H}_{17}\text{O}_3\text{S}$  ( $\text{M}+\text{H}$ ) $^+$ : 313.0893, found: 313.0883.

#### 1-(5-Methoxy-3-(pyridin-3-yl)benzo[b]thiophen-2-yl)ethan-1-one (4f)



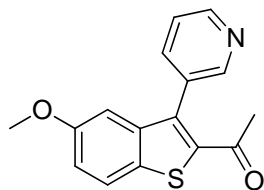

Pale yellow solid. M.p. 57–59 °C. **<sup>1</sup>H NMR** (400 MHz, CDCl<sub>3</sub>): δ 8.76 (dd, *J* = 4.9, 2.2 Hz, 1H), 8.66 (dd, *J* = 2.2, 0.8 Hz, 1H), 7.79–7.73 (m, 2H), 7.50 (ddd, *J* = 8.0, 4.9, 0.8 Hz, 1H), 7.16 (dd, *J* = 8.0, 2.5 Hz, 1H), 6.77 (d, *J* = 2.5 Hz, 1H), 3.74 (s, 3H), 2.21 (s, 3H). **<sup>13</sup>C NMR** (100 MHz, CDCl<sub>3</sub>): δ 192.4, 158.2, 150.2, 149.8, 141.6, 141.5, 137.25, 137.23, 133.2, 131.4, 123.6, 123.5, 118.9, 106.1, 55.6, 30.1. **HRMS** (ESI): calculated for C<sub>16</sub>H<sub>14</sub>NO<sub>2</sub>S (M+H)<sup>+</sup>: 284.0740, found: 284.0727.

#### Cyclopropyl(5-methoxy-3-phenylbenzo[b]thiophen-2-yl)methanone (4g)

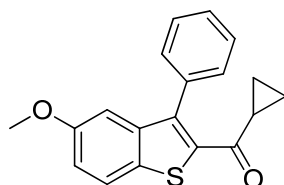

Pale yellow solid. M.p. 93–94 °C. **<sup>1</sup>H NMR** (400 MHz, CDCl<sub>3</sub>): δ 7.74 (d, *J* = 8.8 Hz, 1H), 7.54–7.44 (m, 5H), 7.11 (dd, *J* = 8.8, 2.5 Hz, 1H), 6.93 (d, *J* = 2.5 Hz, 1H), 3.74 (s, 3H), 1.83–1.77 (m, 1H), 1.18–1.12 (m, 2H), 0.72–0.67 (m, 2H). **<sup>13</sup>C NMR** (100 MHz, CDCl<sub>3</sub>): δ 196.4, 157.9, 141.8, 141.7, 140.8, 135.3, 133.3, 130.1, 128.7, 128.5, 123.4, 118.0, 106.7, 55.5, 20.8, 12.7. **HRMS** (ESI): calculated for C<sub>19</sub>H<sub>17</sub>O<sub>2</sub>S (M+H)<sup>+</sup>: 309.0944, found: 309.0936.

#### 1-(3-Ethyl-5-methoxybenzo[b]thiophen-2-yl)ethanone (4h)

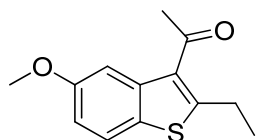

White solid. M.p. 65–66 °C. **<sup>1</sup>H NMR** (400 MHz, CDCl<sub>3</sub>): δ 7.64–7.59 (m, 2H), 6.97 (dd, *J* = 8.7, 2.6 Hz, 1H), 3.87 (s, 3H), 3.17 (q, *J* = 7.5 Hz, 2H), 2.65 (s, 3H), 1.41 (t, *J* = 7.5 Hz, 3H). **<sup>13</sup>C NMR** (100 MHz, CDCl<sub>3</sub>): δ 196.3, 158.2, 157.4, 139.5, 132.3, 129.7, 122.4, 114.3, 106.5, 55.6, 31.7, 24.3, 16.0. **HRMS** (ESI): calculated for C<sub>13</sub>H<sub>15</sub>O<sub>2</sub>S (M+H)<sup>+</sup>: 235.0787, found: 235.0779.

### 5-Methoxy-3-phenylbenzo[b]thiophene-2-carbaldehyde (4i)

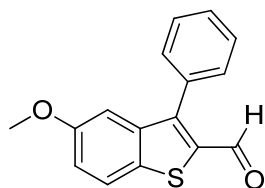

Yellow solid. M.p. 105–106 °C. **<sup>1</sup>H NMR** (400 MHz, CDCl<sub>3</sub>): δ 9.90 (s, 1H), 7.81–7.76 (m, 1H), 7.58–7.50 (m, 5H), 7.20–7.14 (m, 2H), 3.79 (s, 3H). **<sup>13</sup>C NMR** (100 MHz, CDCl<sub>3</sub>): δ 185.9, 158.2, 147.1, 140.4, 140.1, 134.7, 132.6, 130.4, 129.0, 128.9, 124.0, 119.4, 106.5, 55.6. **HRMS** (ESI): calculated for C<sub>16</sub>H<sub>13</sub>O<sub>2</sub>S (M+H)<sup>+</sup>: 269.0631, found: 269.0626.

### 2,3-Diphenylbenzo[b]thiophene (4j)

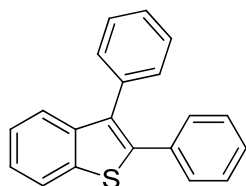

White solid. M.p. 113–114 °C. **<sup>1</sup>H NMR** (400 MHz, CDCl<sub>3</sub>): δ 7.87–7.83 (m, 1H), 7.60–7.55 (m, 1H), 7.41–7.28 (m, 9H), 7.24–7.19 (m, 3H). **<sup>13</sup>C NMR** (100 MHz, CDCl<sub>3</sub>): δ 141.0, 139.6, 138.9, 135.6, 134.3, 133.3, 130.5, 129.7, 128.7, 128.8, 127.7, 127.4, 124.6, 124.5, 123.4, 122.1. **HRMS** (ESI): calculated for C<sub>20</sub>H<sub>15</sub>S (M+H)<sup>+</sup>: 287.0934, found: 287.0929.

## References

- (1) K. Kucinski, L. Wisniewska, G. Hreczycho, *Curr. Org. Chem.*, 2016, **20**, 1345-1349.
- (2) J. Panteleev, R. Y. Huang, E. K. Lui, M. Lautens, *Org. Lett.*, 2011, **13**, 5314-5317.
- (3) Y. F. Qiu, F. Yang, Z. H. Qiu, M. J. Zhong, L. J. Wang, Y. Y. Ye, B. Song, Y. M. Liang, *J. Org. Chem.*, 2013, **78**, 12018–12028.
- (4) X. Zhang, S. Sarkar, R. C. Larock, *J. Org. Chem.*, 2006, **71**, 236-243.
- (5) Y. X. Xie, R. J. Song, X. H. Yang, J. N. Xiang, J. H. Li, *Eur. J. Org. Chem.*, 2013, **2013**, 5737–5742.
- (6) J. Meesin, P. Katrun, C. Pareseecharoen, M. Pohmakotr, V. Reutrakul, D. Soorukram, C. Kuhakarn, *J. Org. Chem.*, 2016, **81**, 2744–2752.
- (7) A. Talla, B. Driessen, N. J. Straathof, L. G. Milroy, L. Brunsveld, V. Hessel, T. Noel, *adv. synth. catal.*, 2015, **357**, 2180-2186.
- (8) A. Shard, R. Kumar, N. Sharma, A. K. Sinha, *RSC Adv.*, 2014, **4**, 33399-33407.
- (9) D. Yang, K. Yan, W. Wei, L. Tian, Q. Li, J. You and H. Wang, *RSC Adv.*, 2014, **4**, 48547-48553.

## 5. NMR Spectra

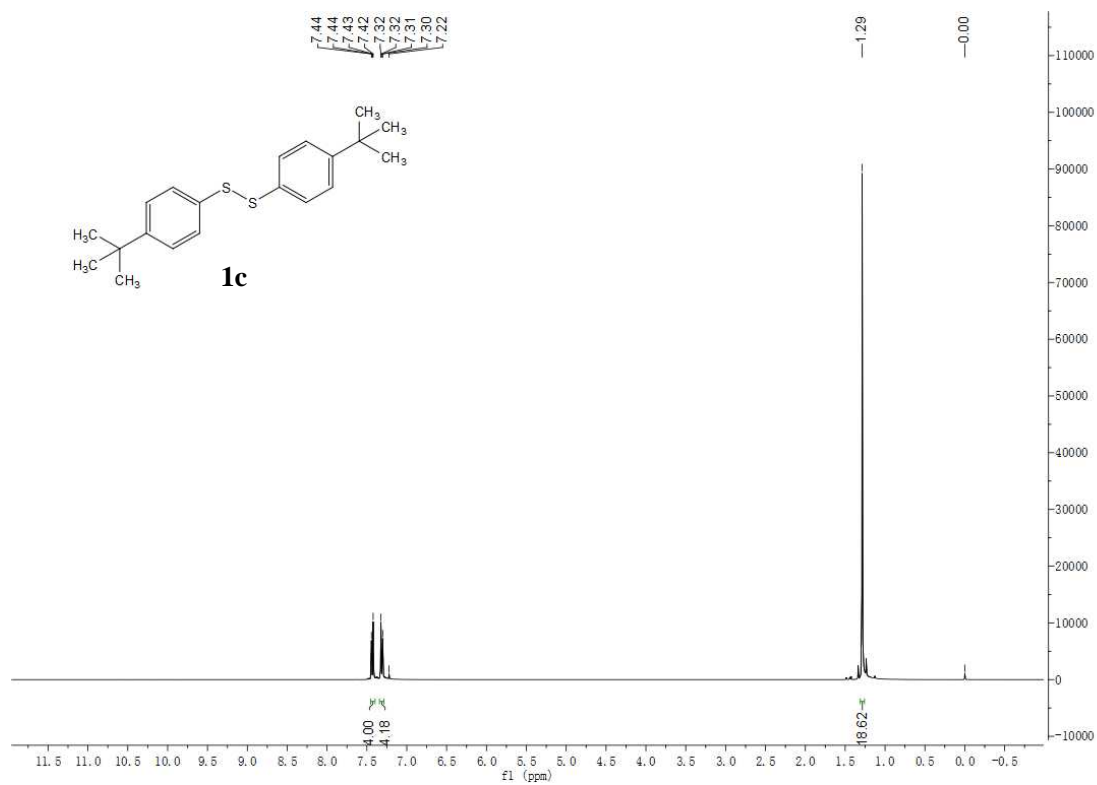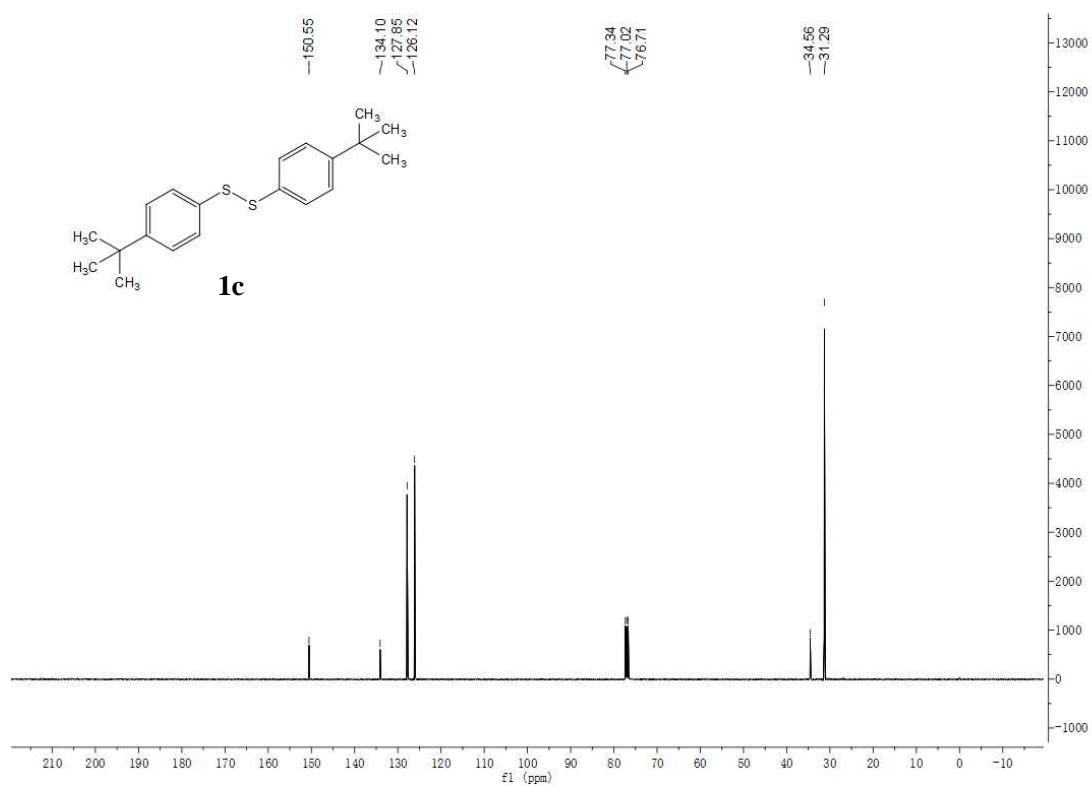

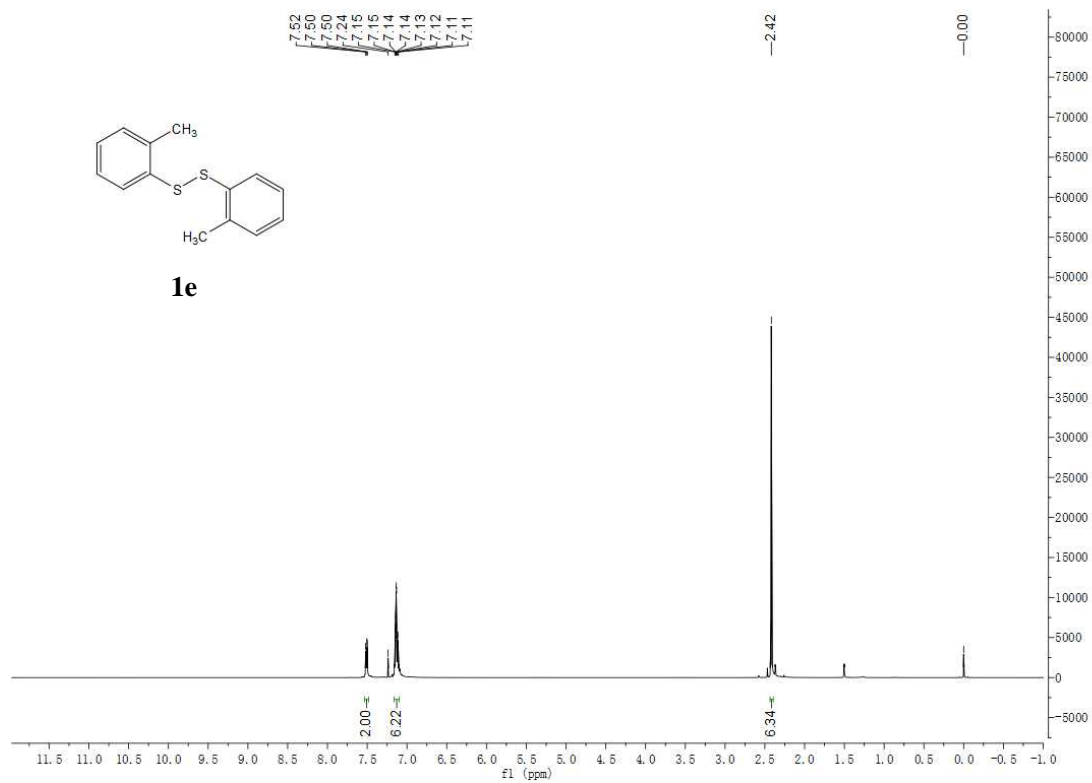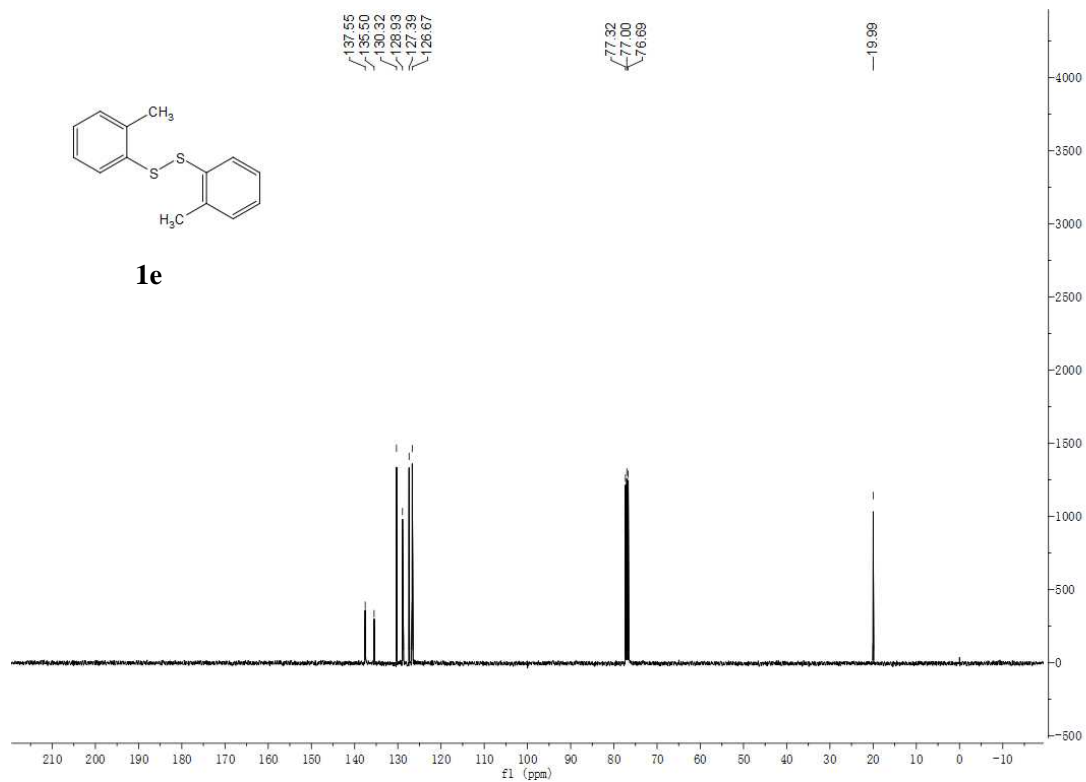

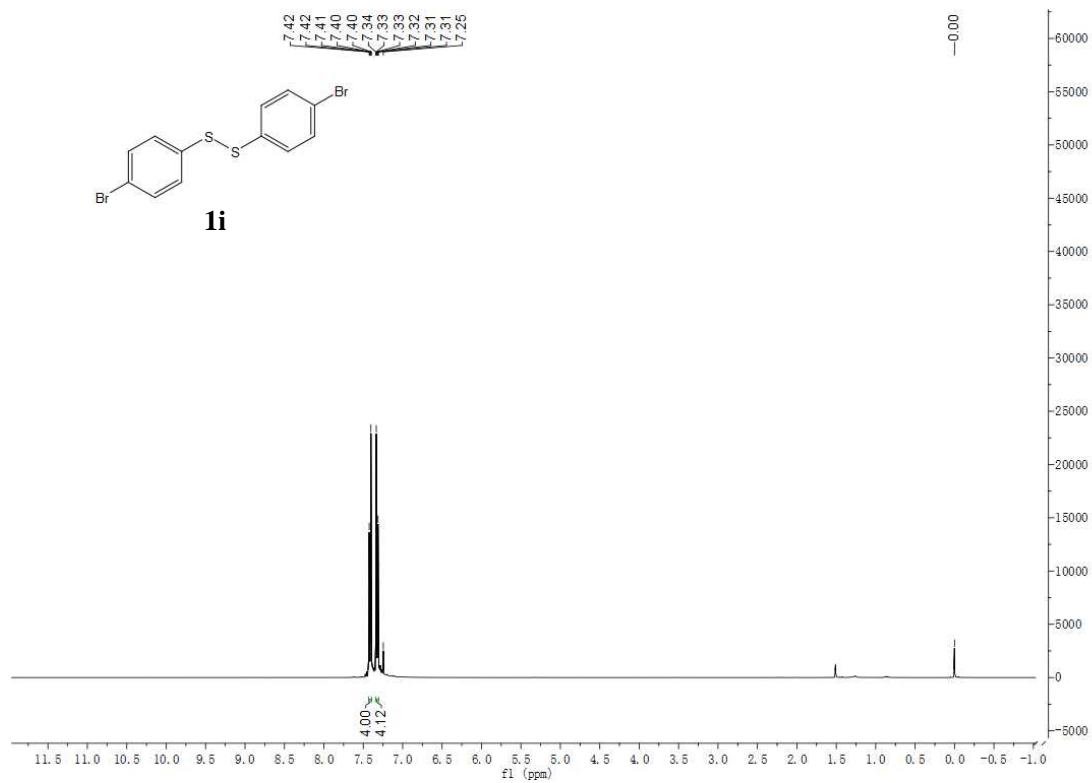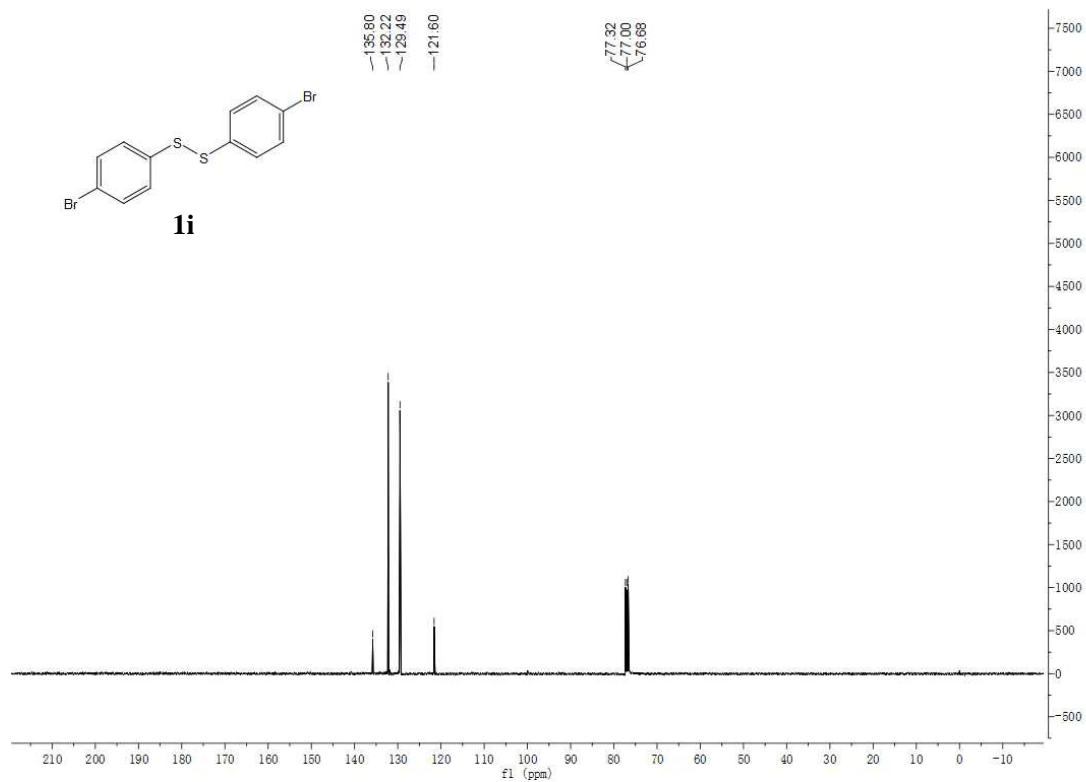

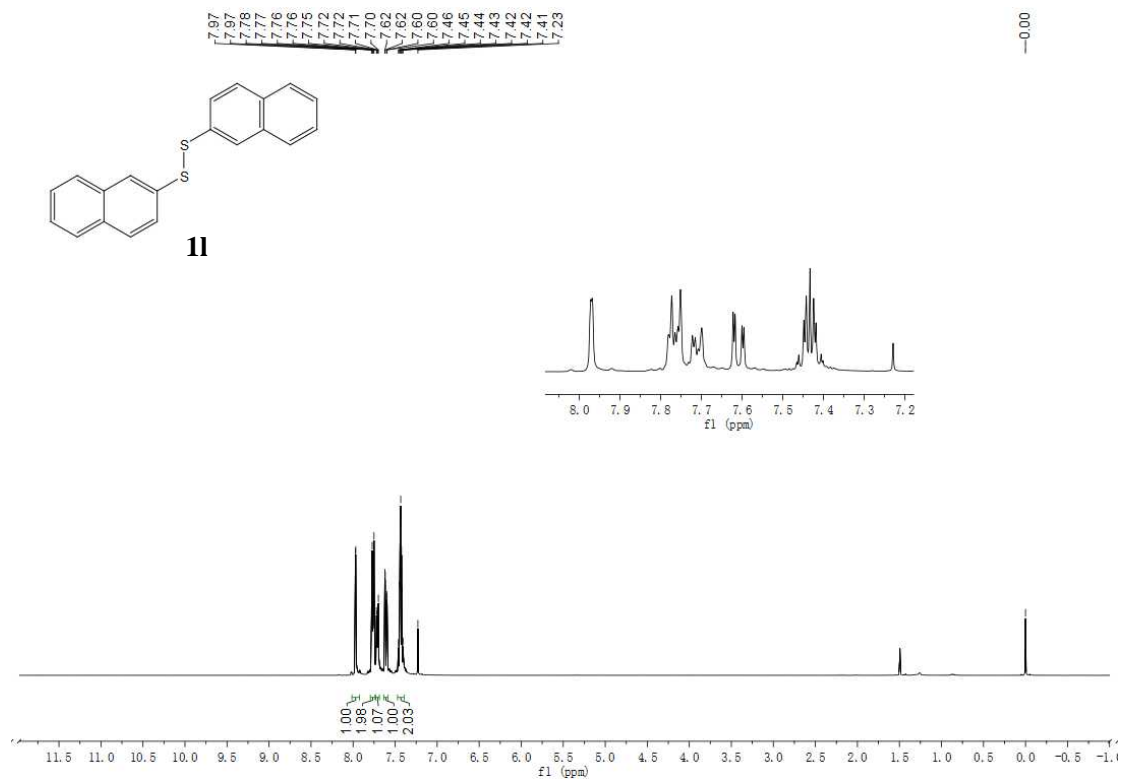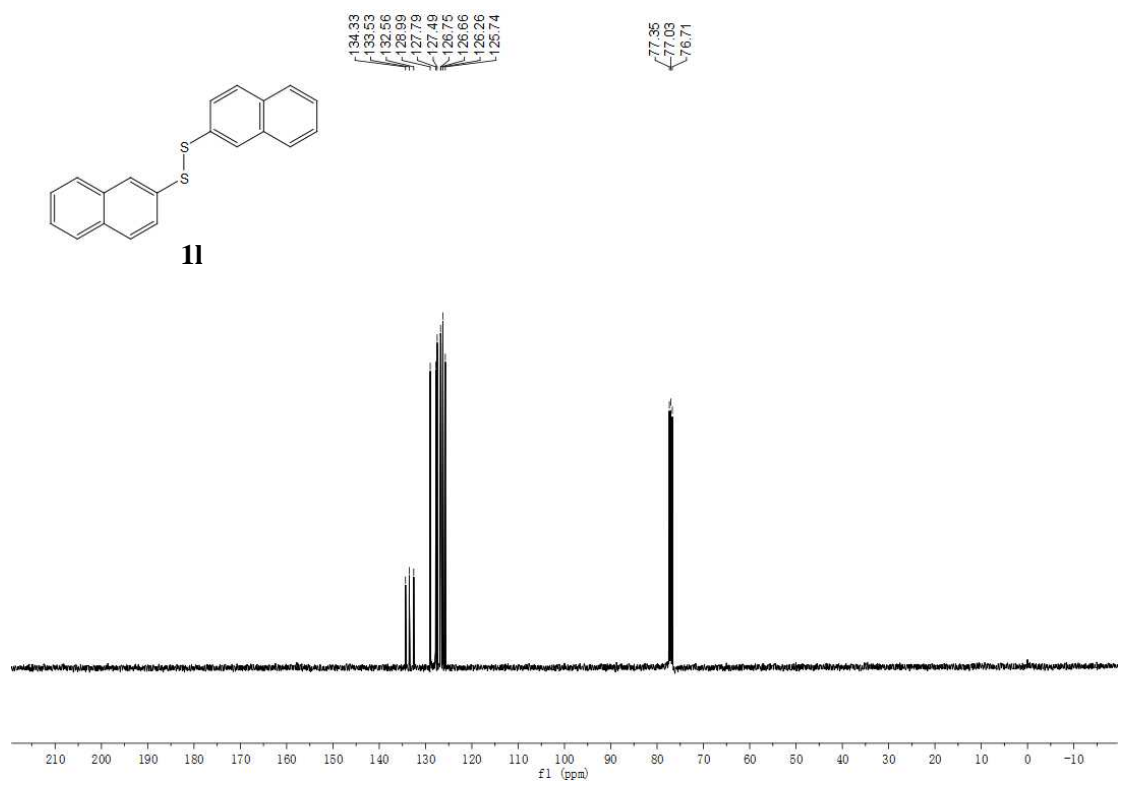

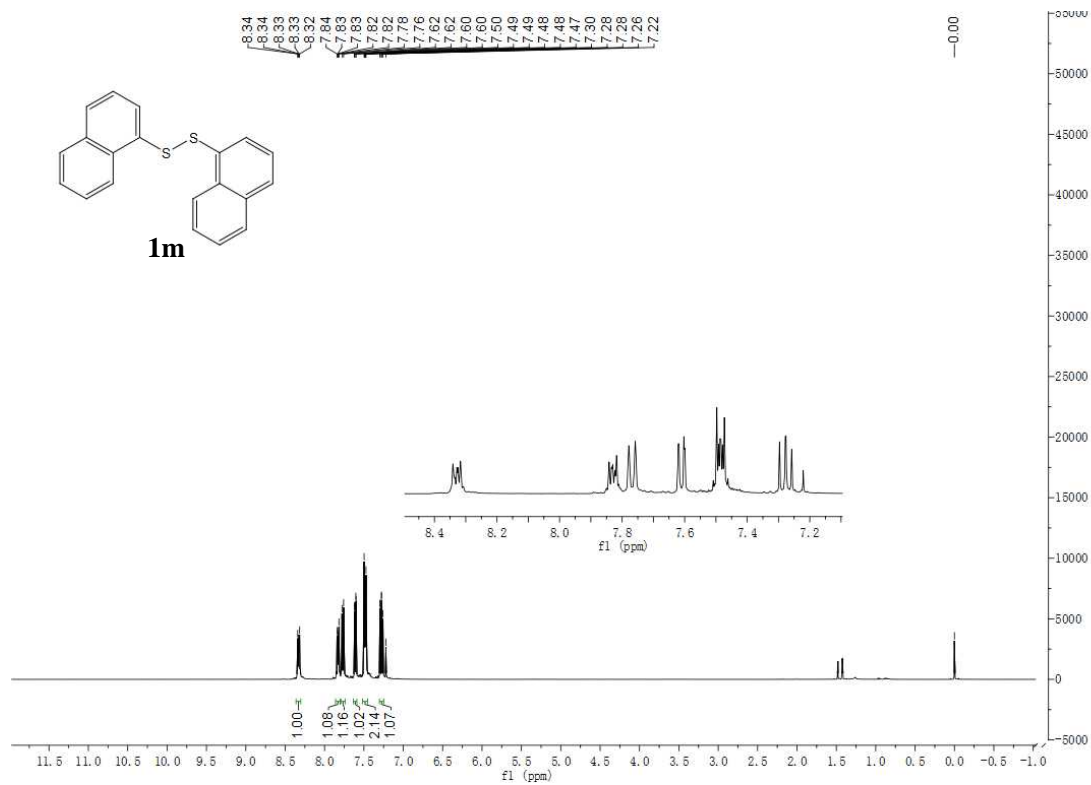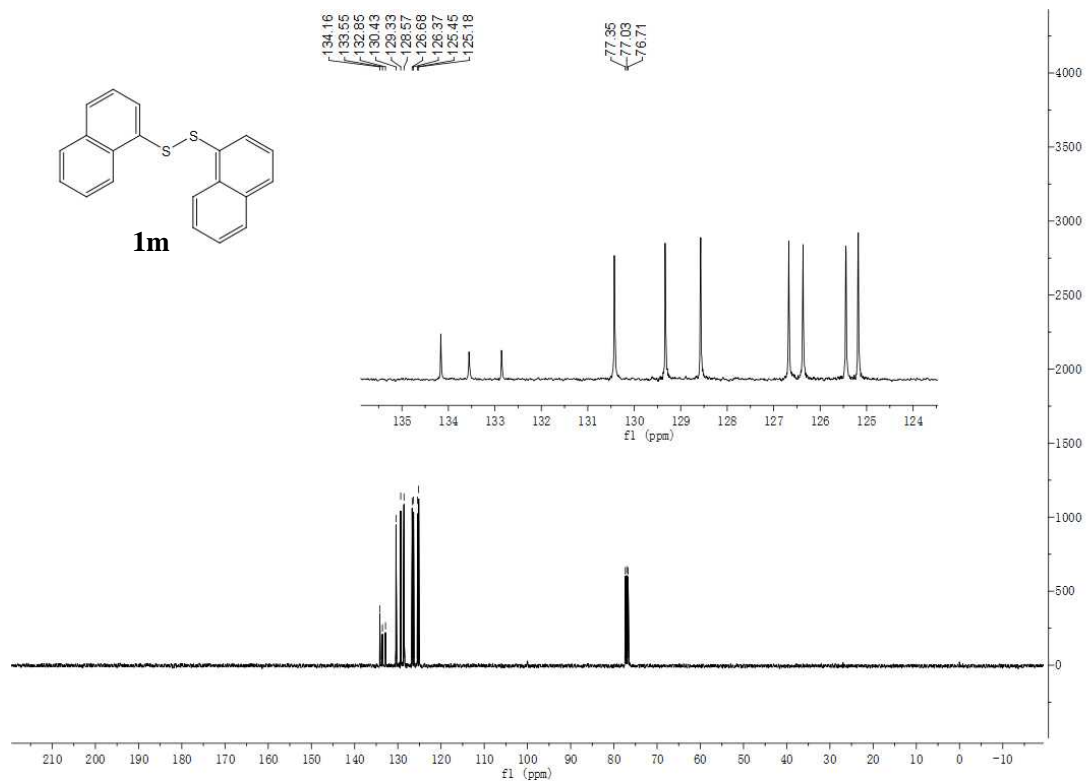



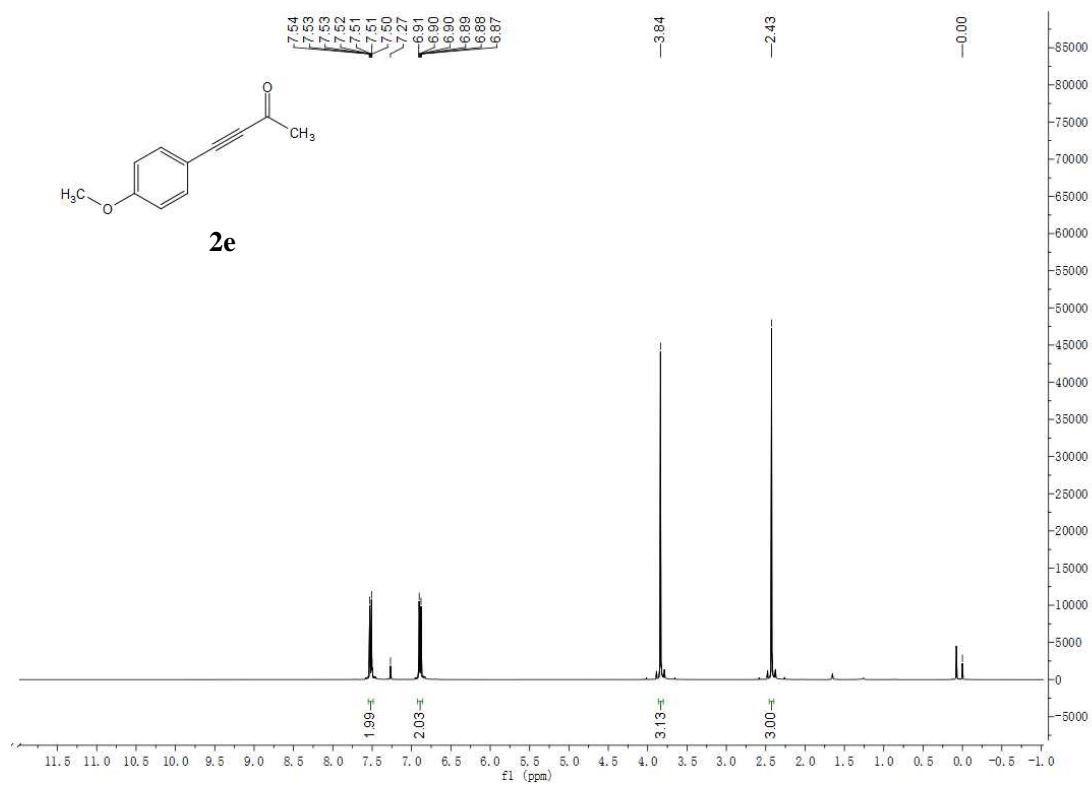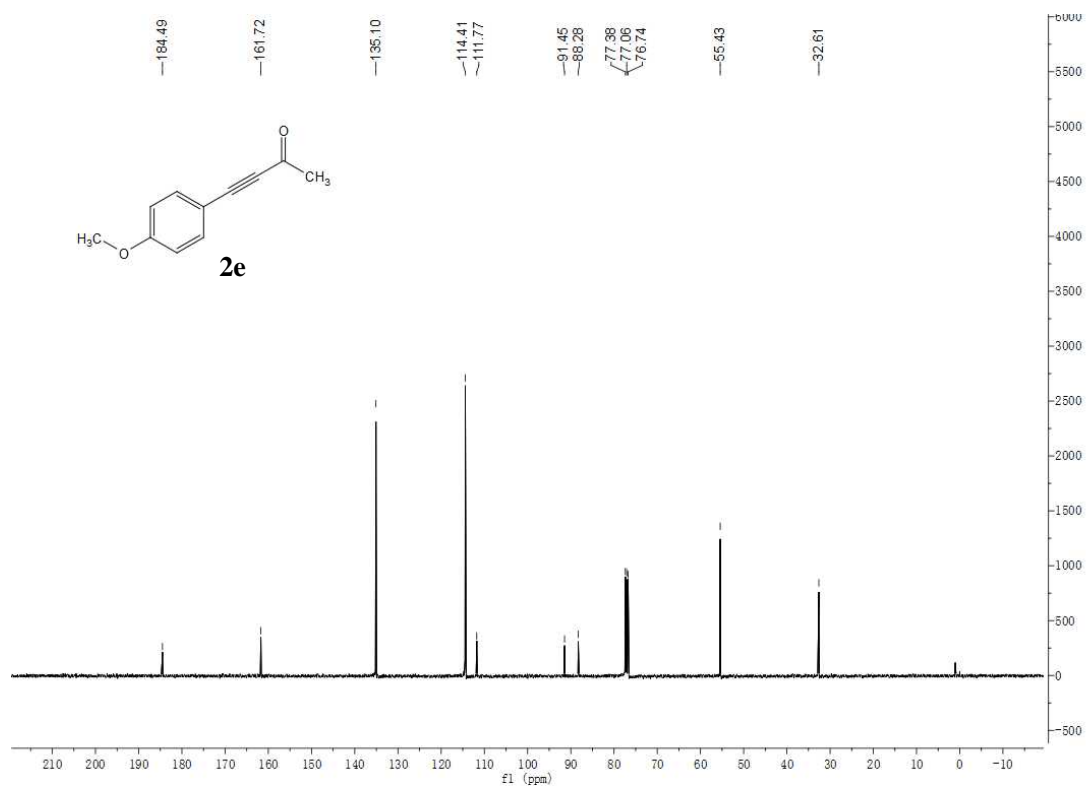

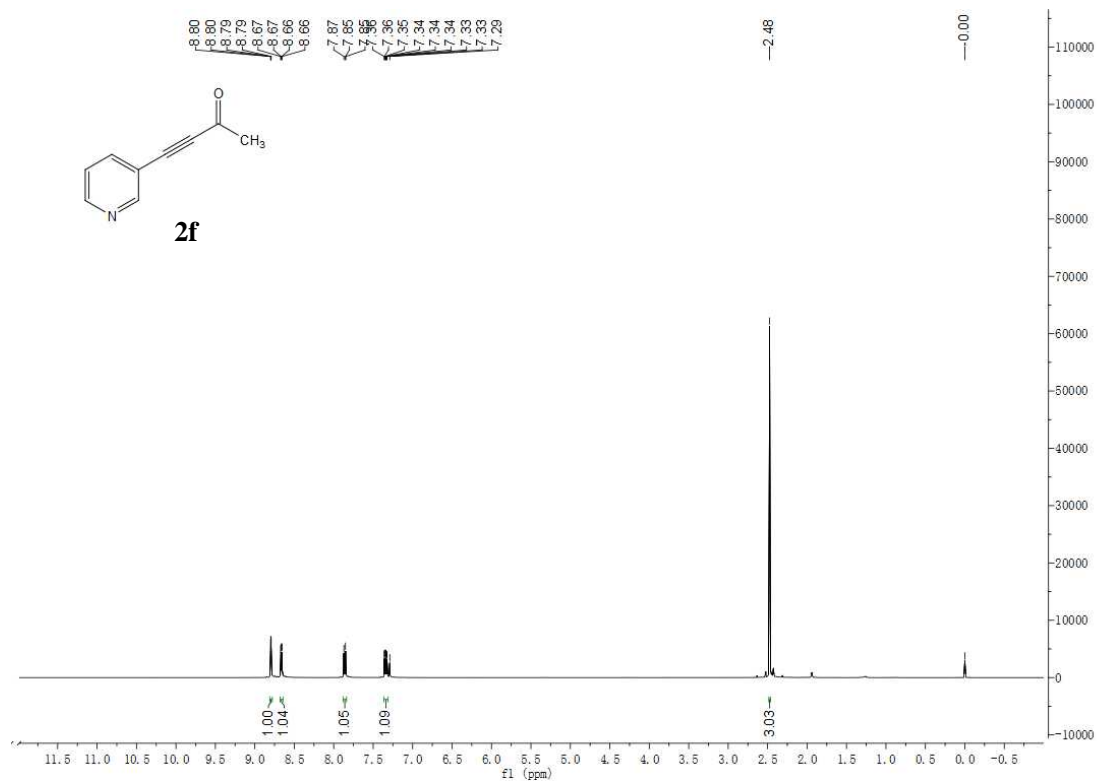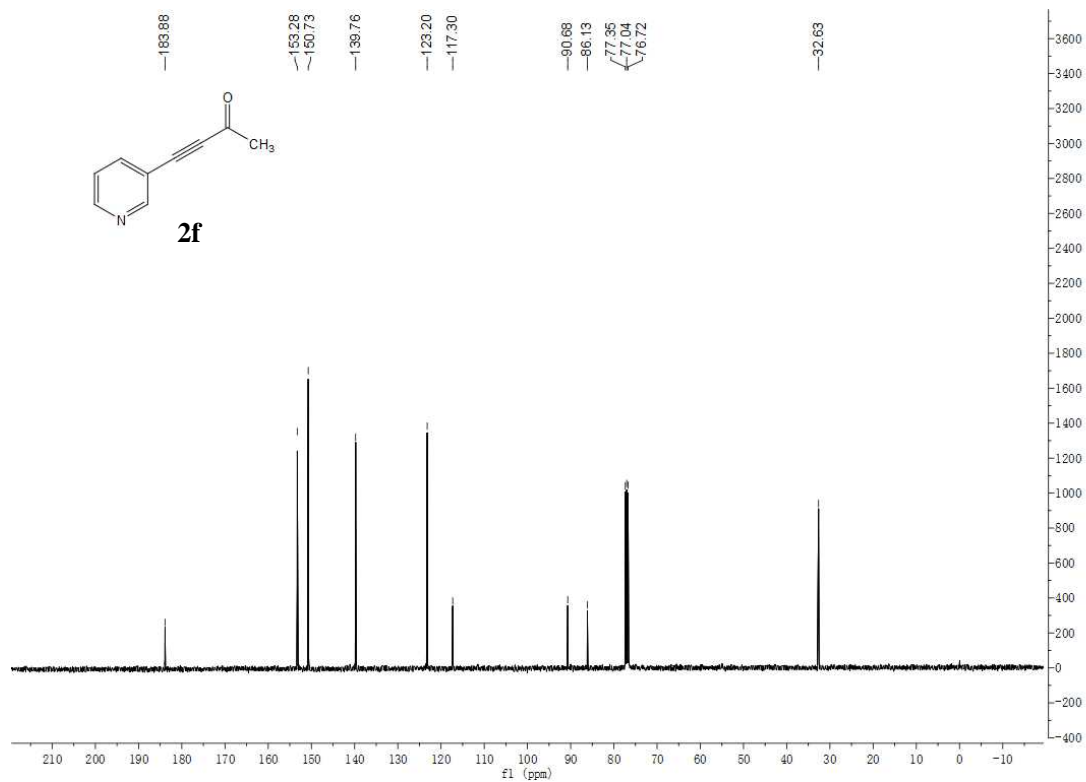

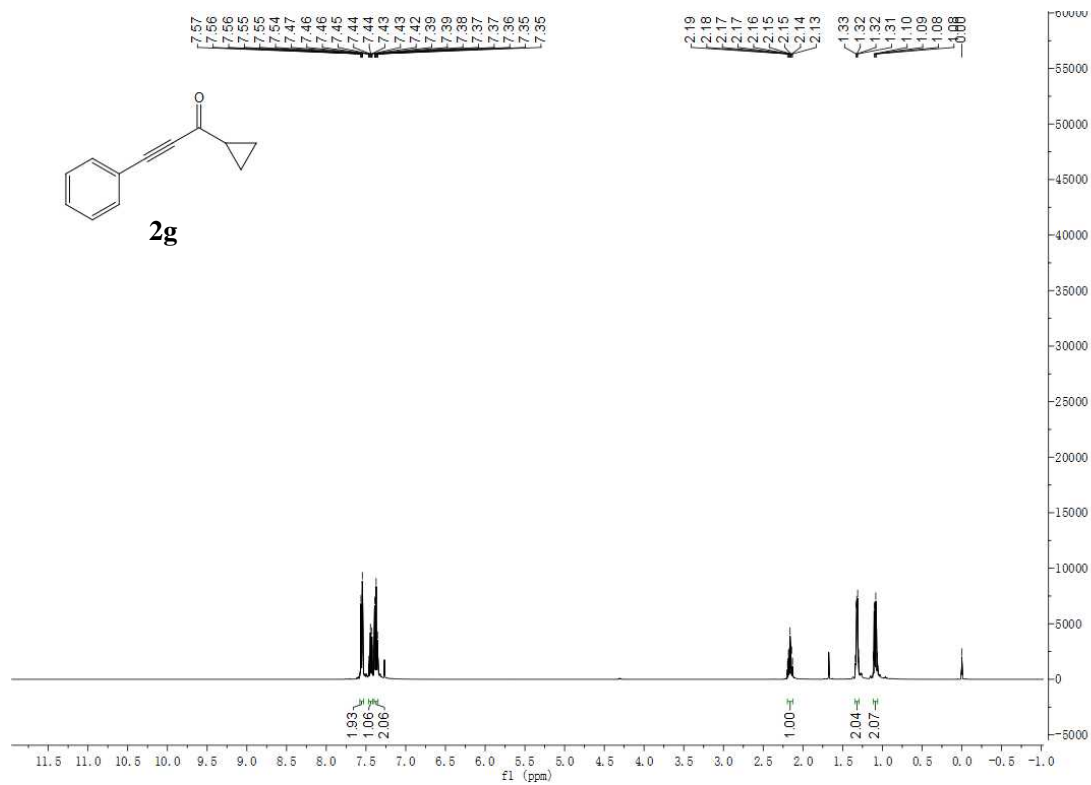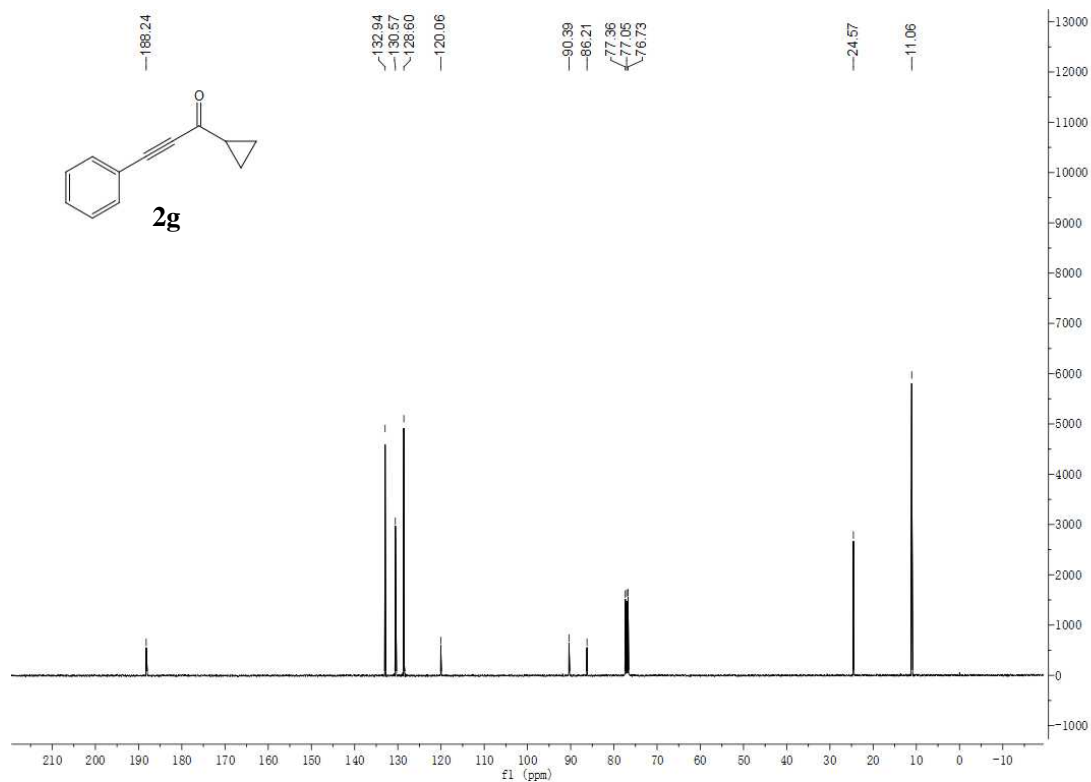

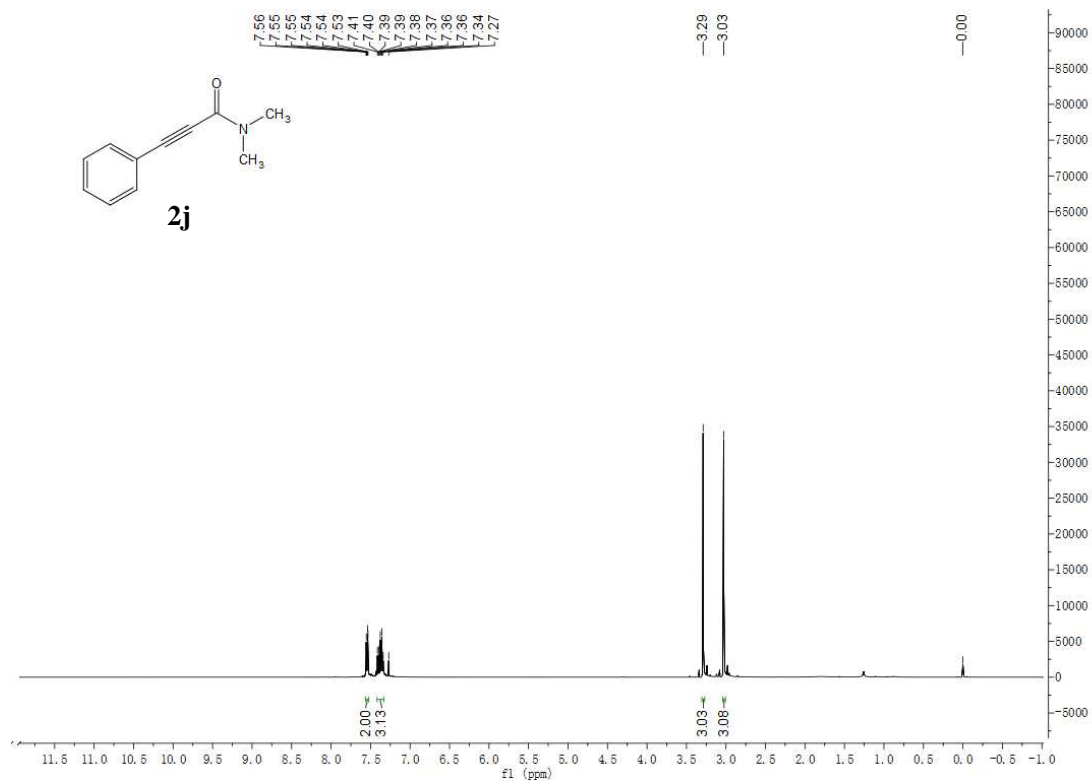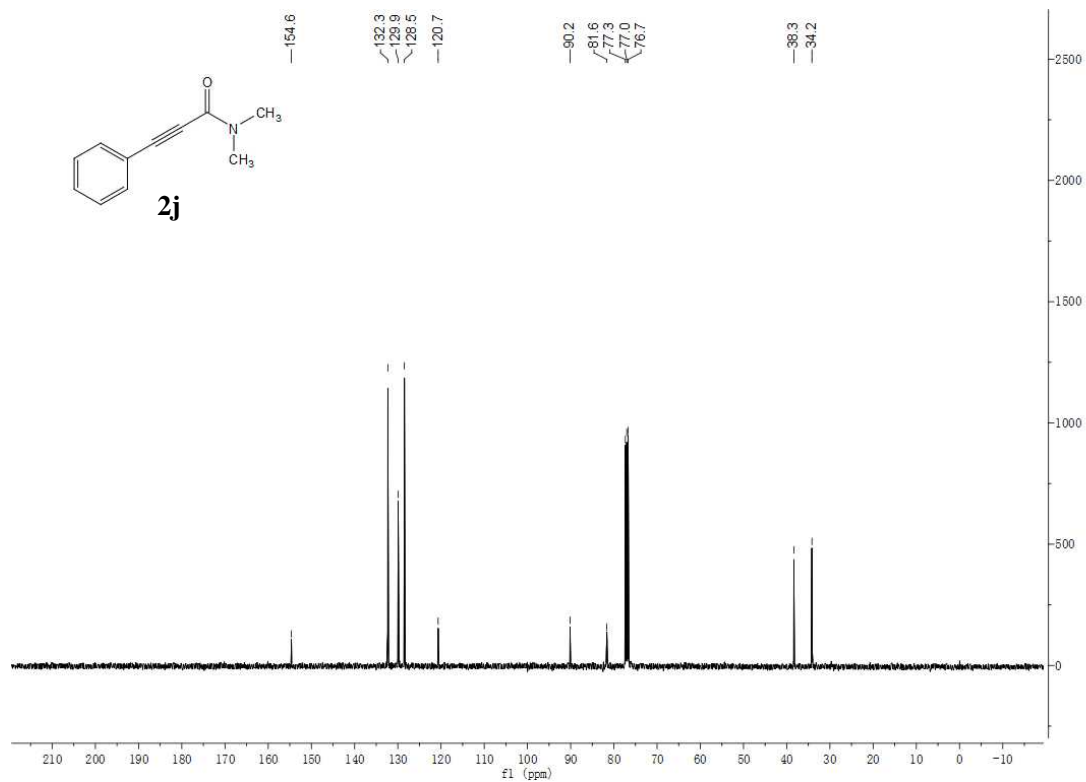

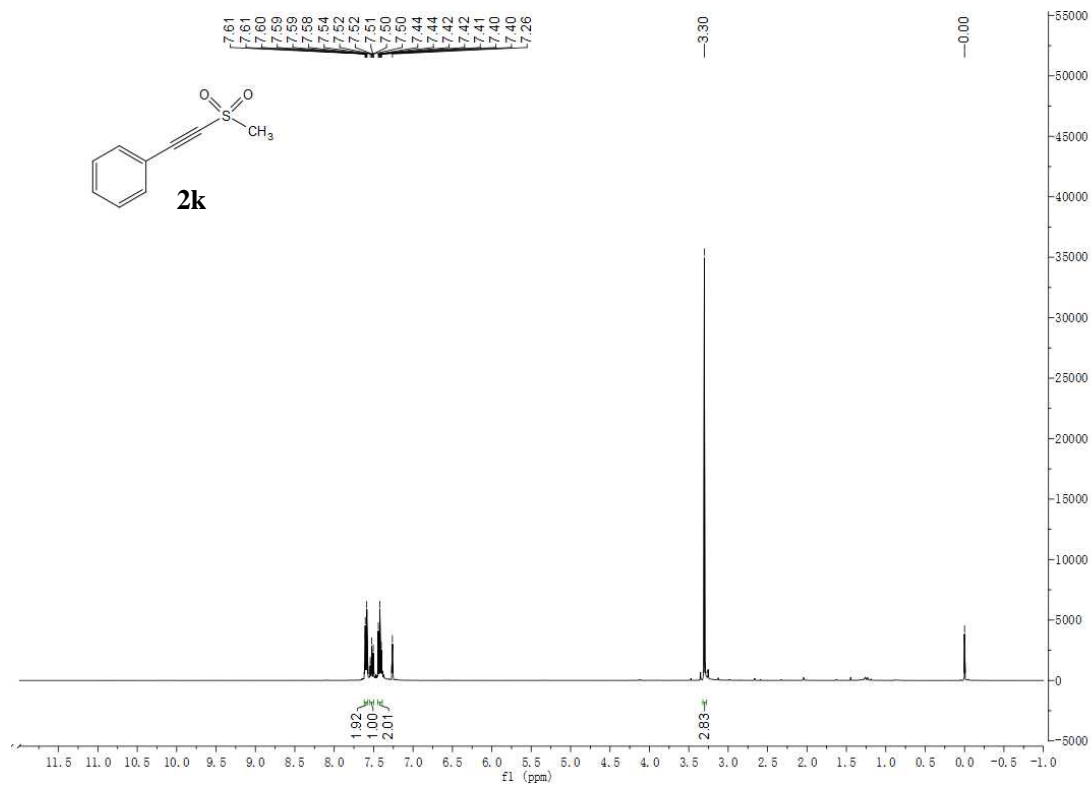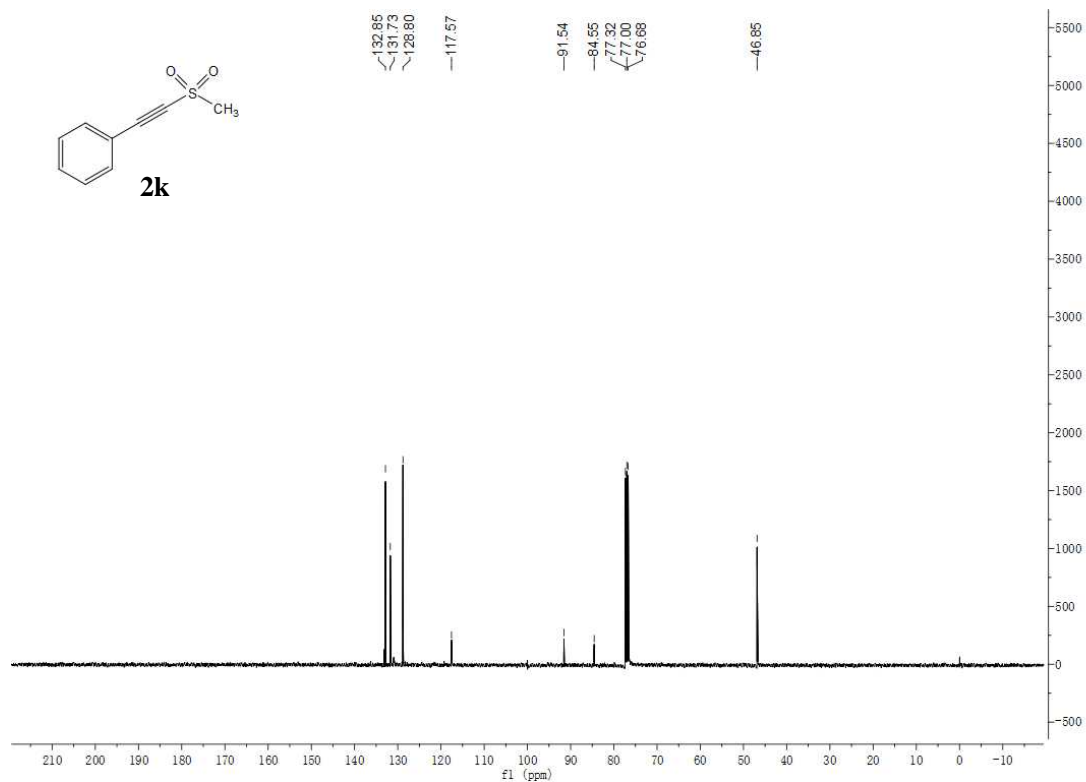

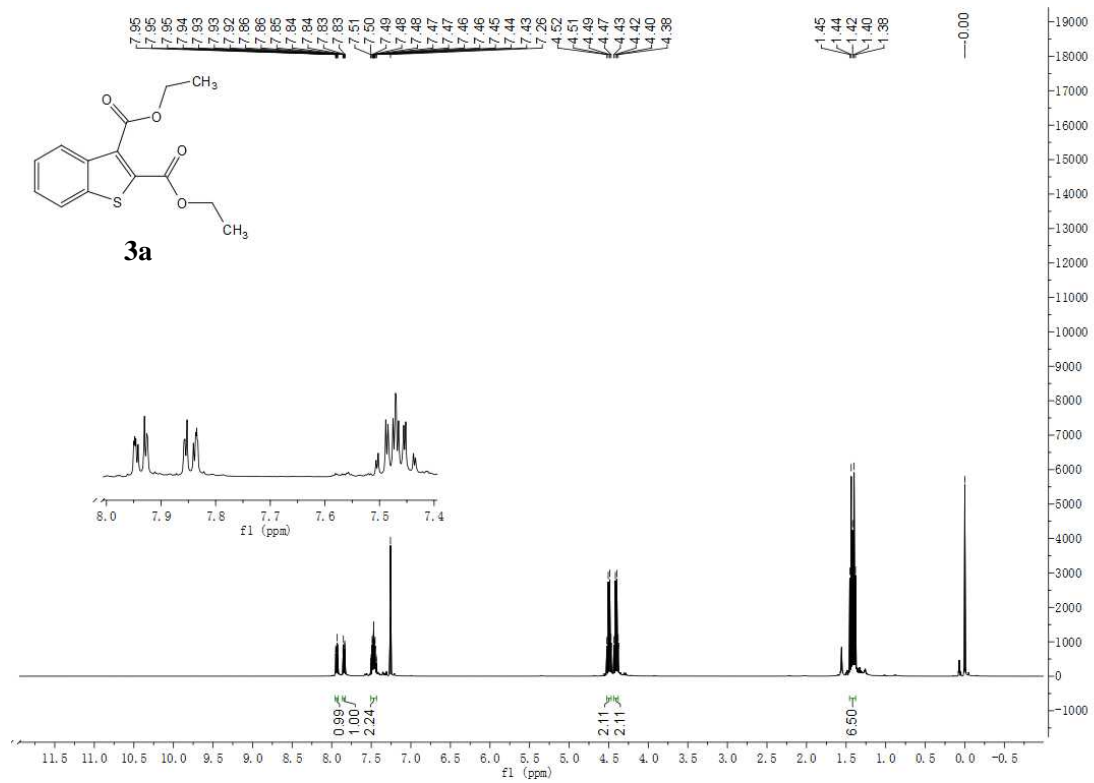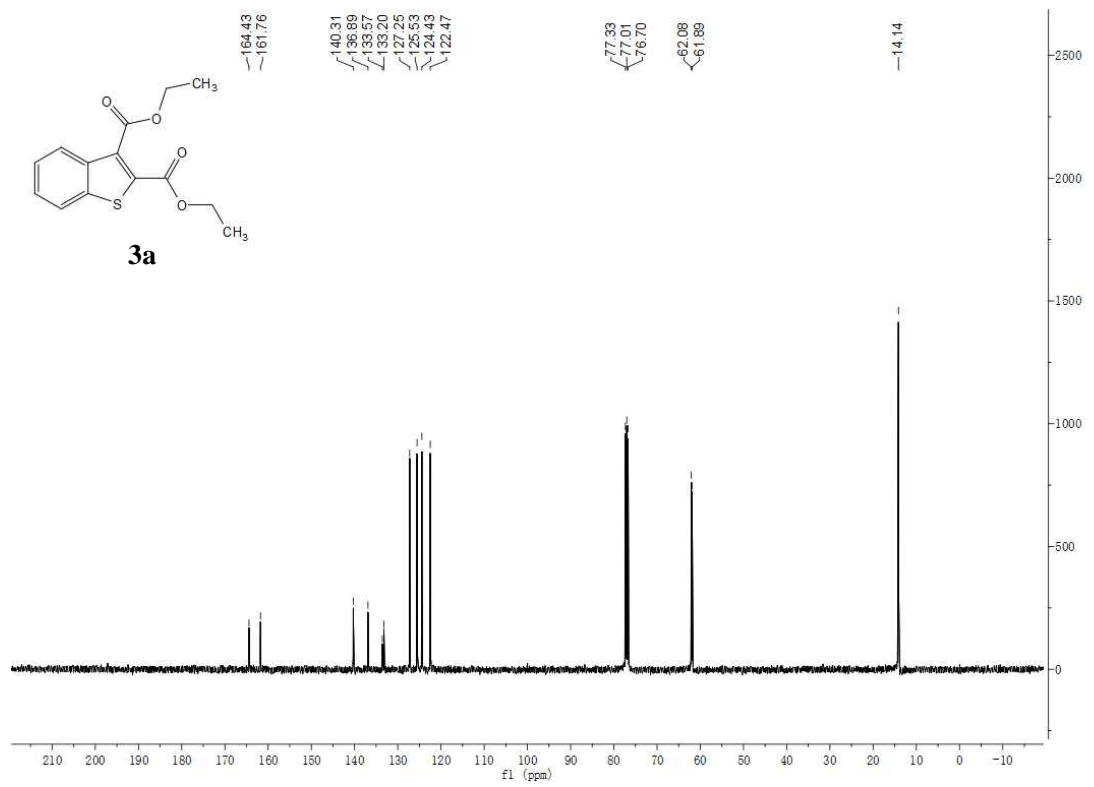

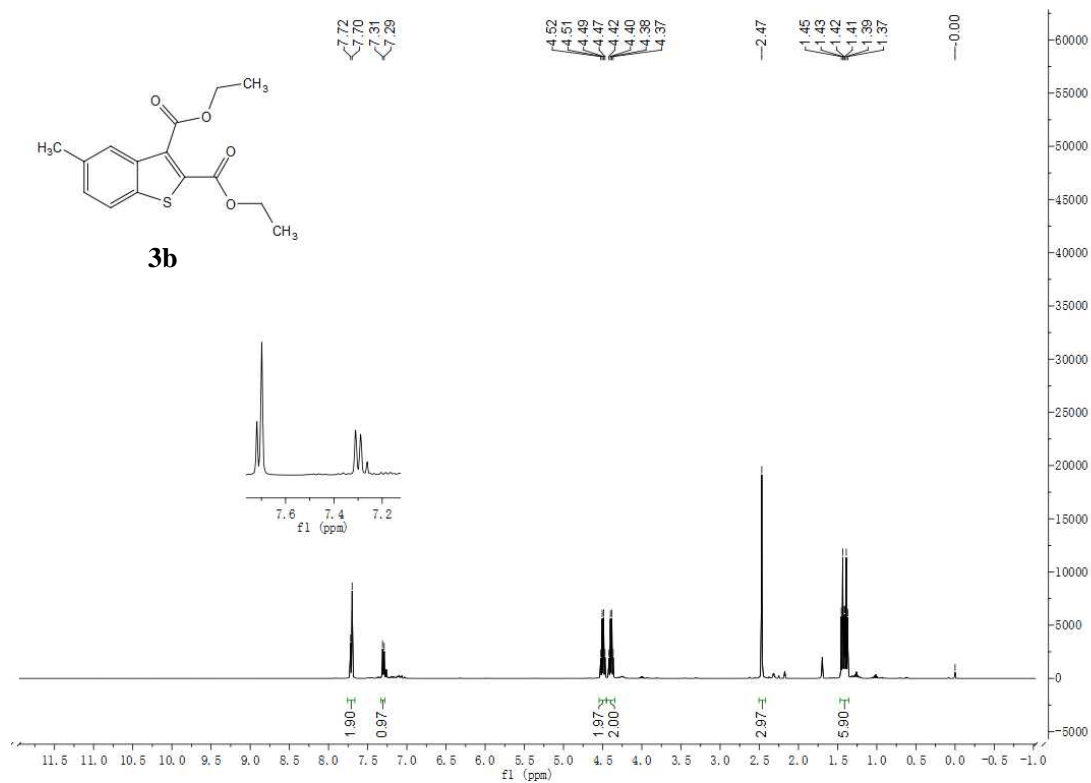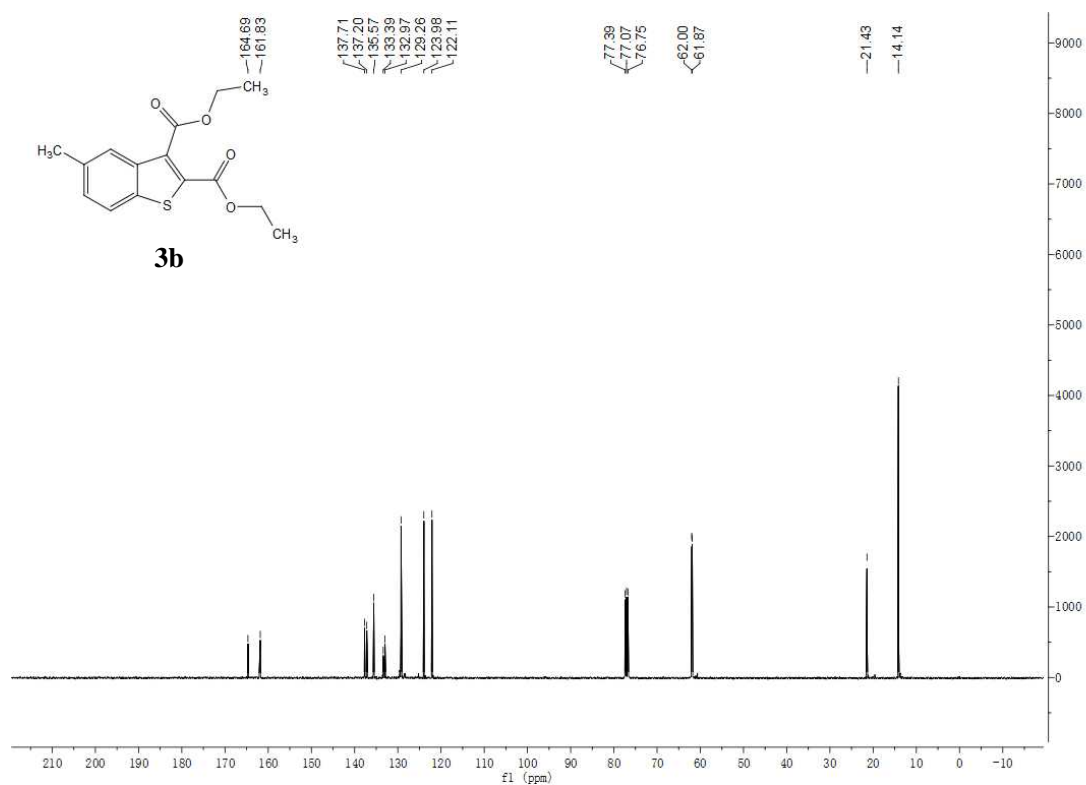

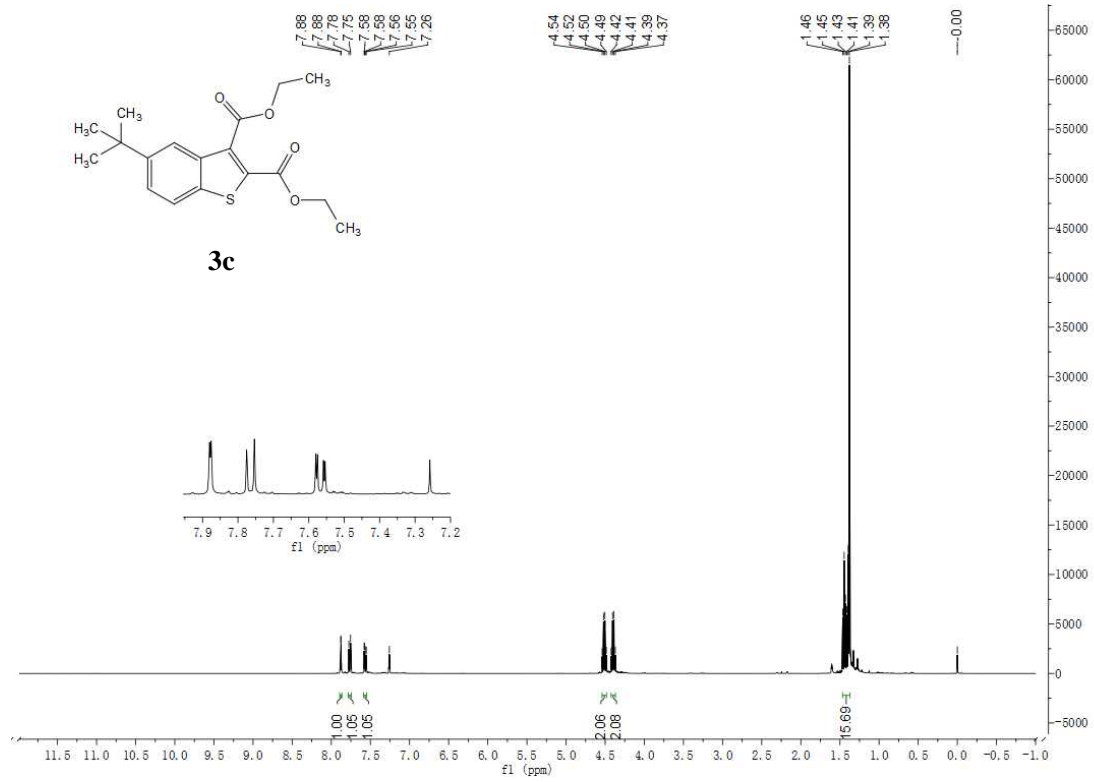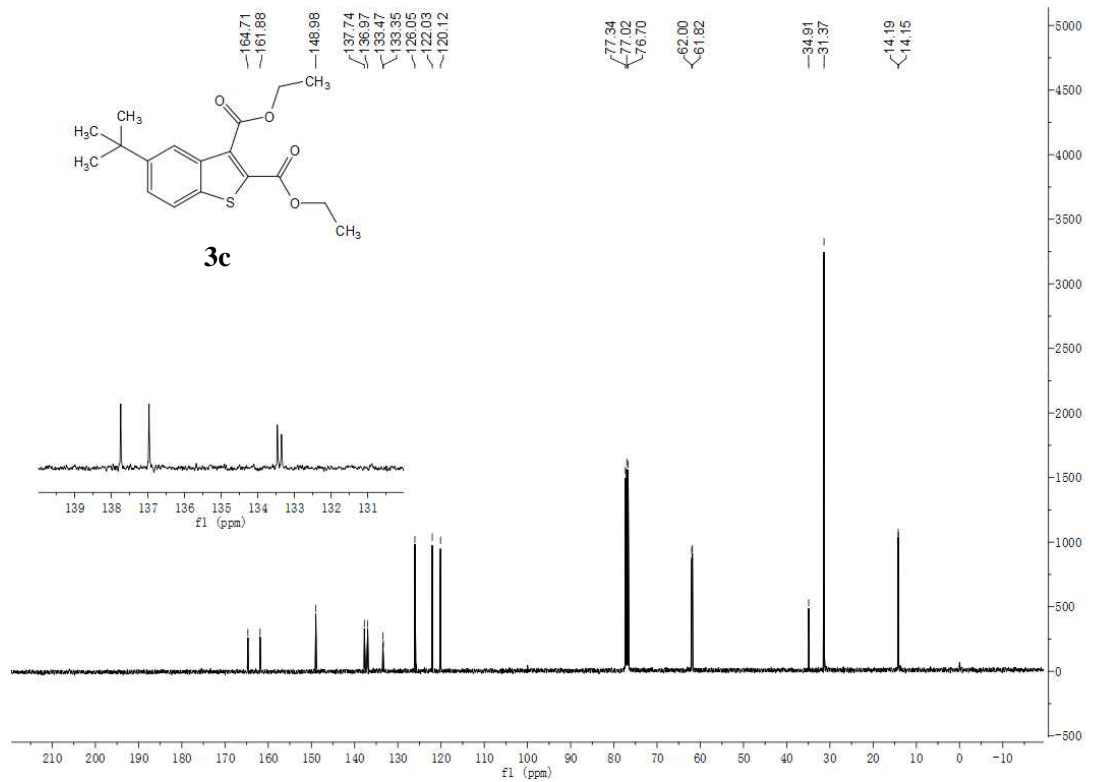



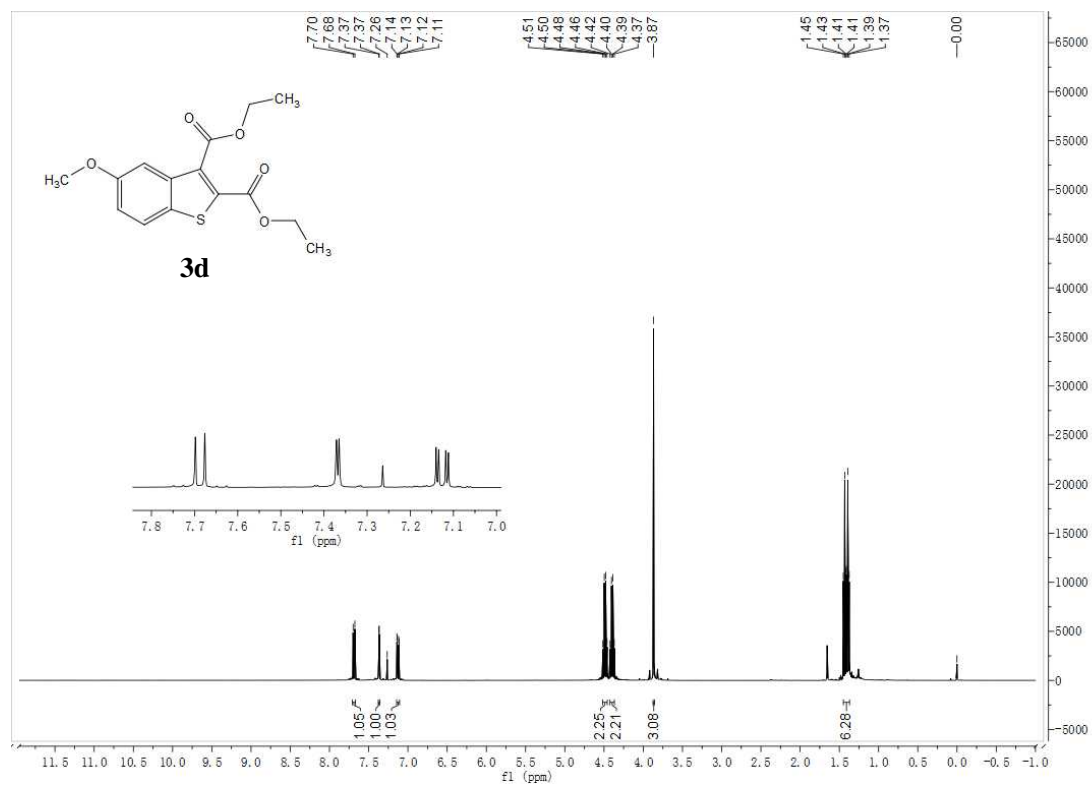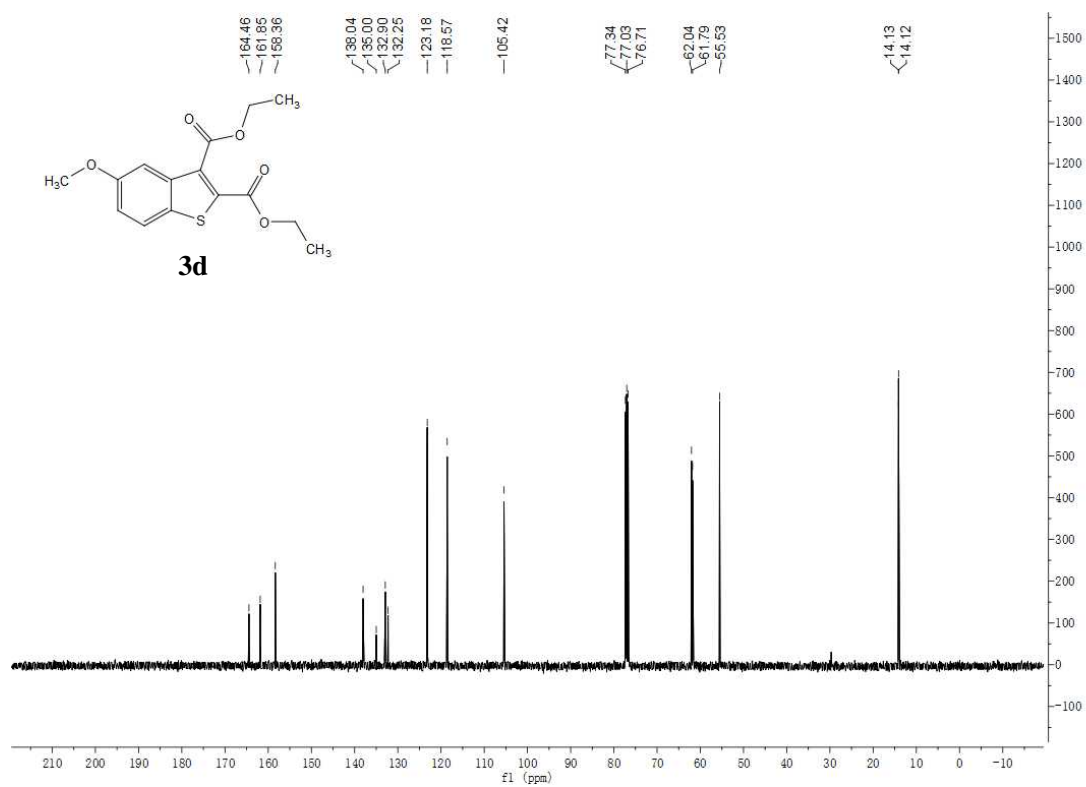

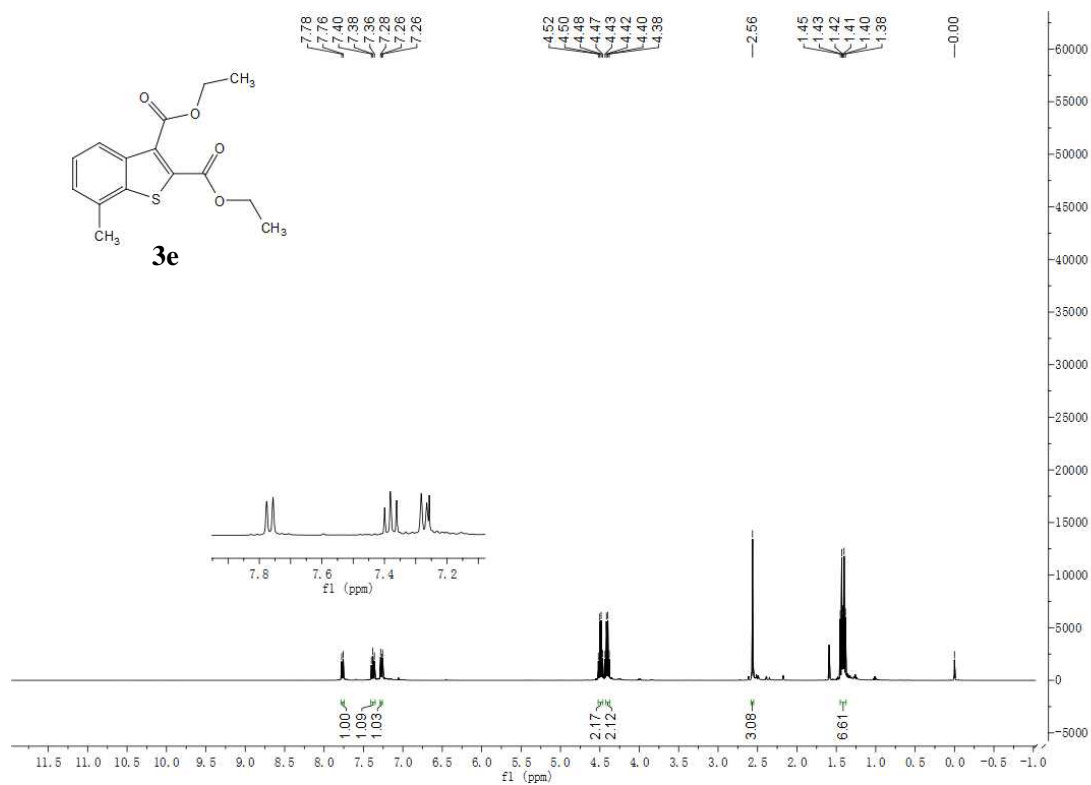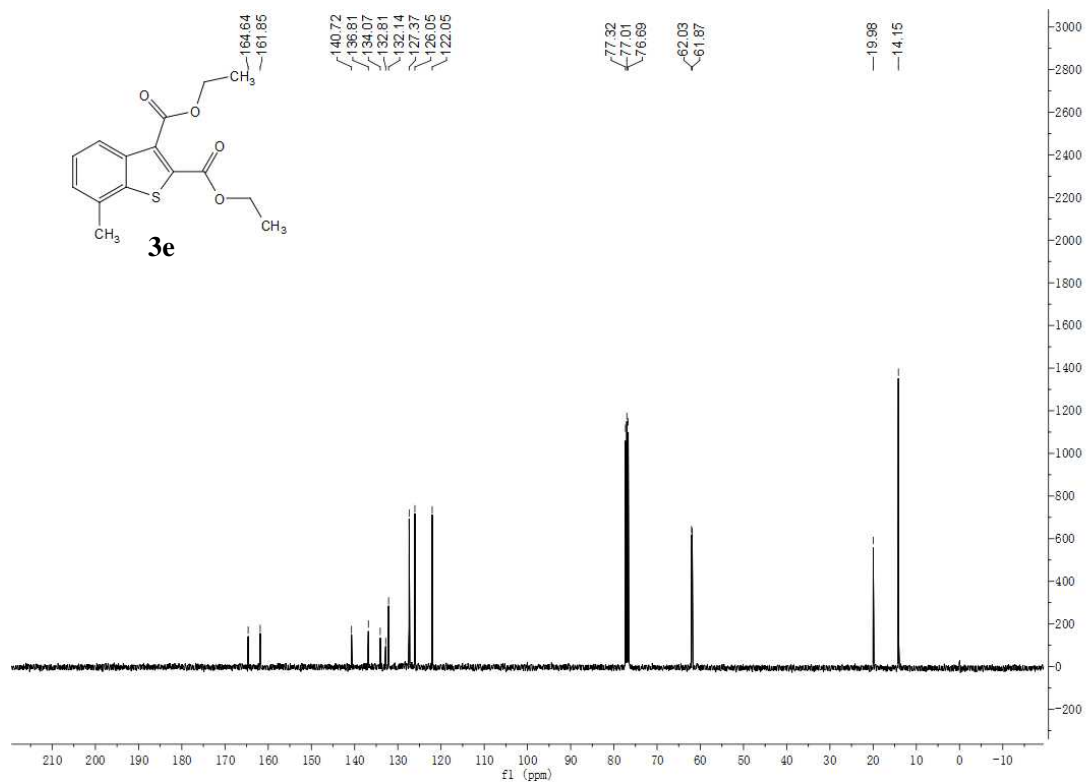

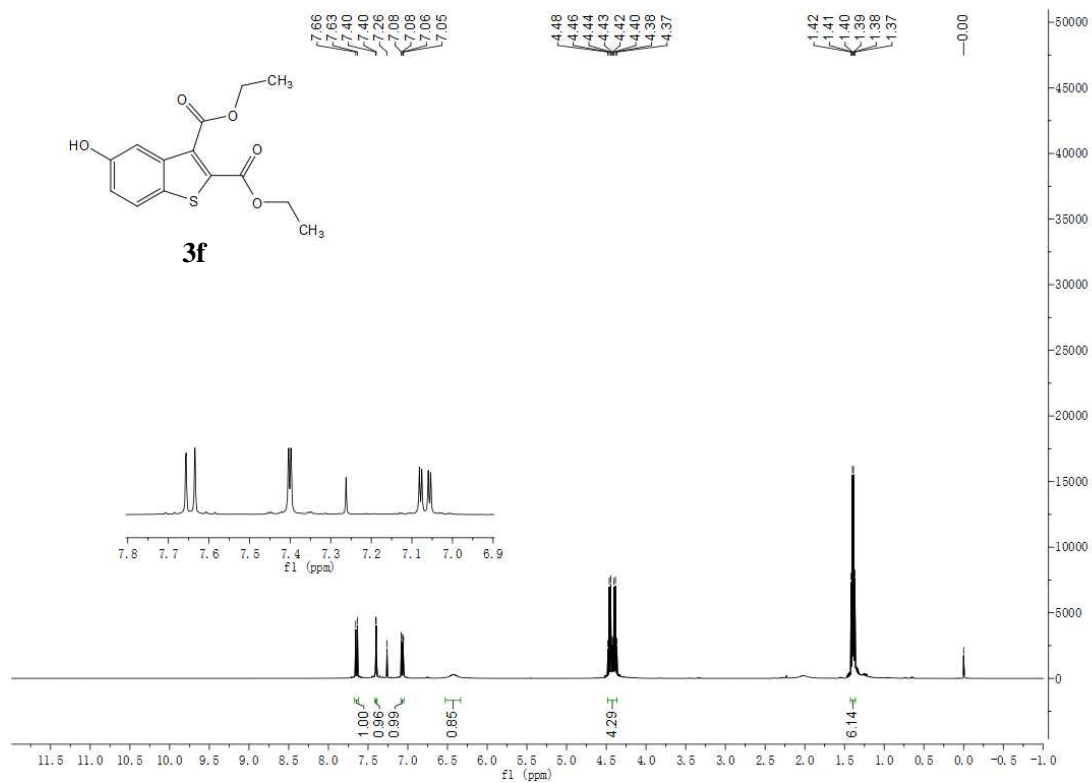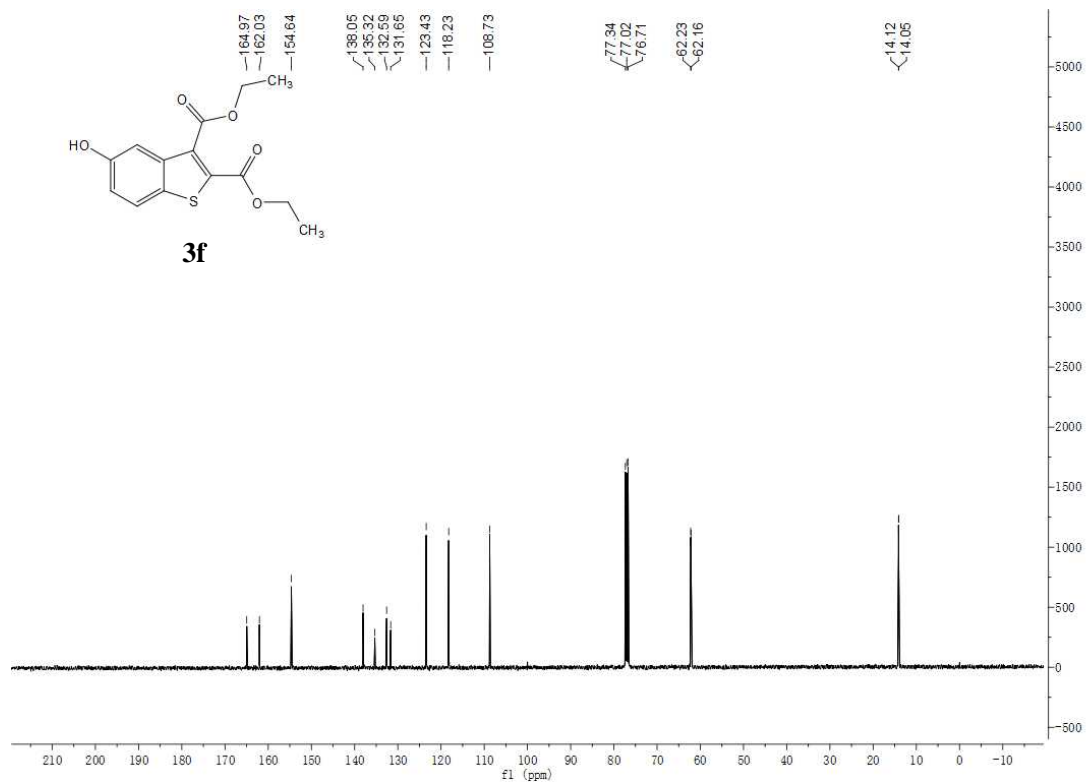

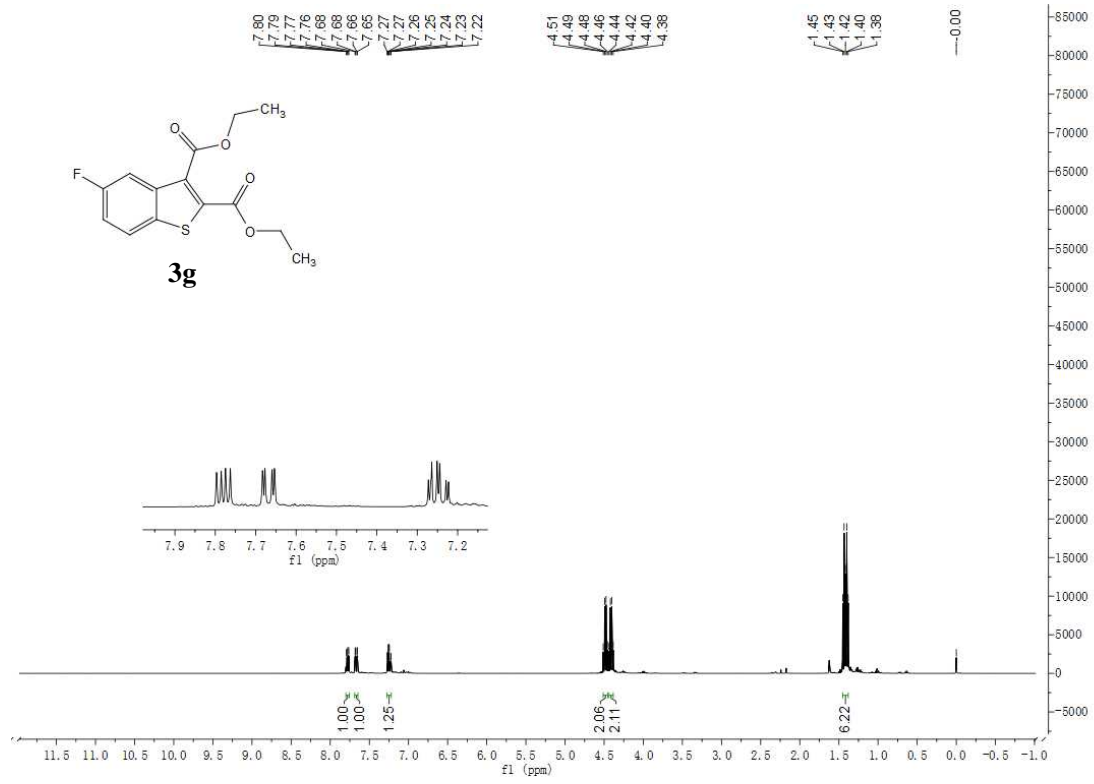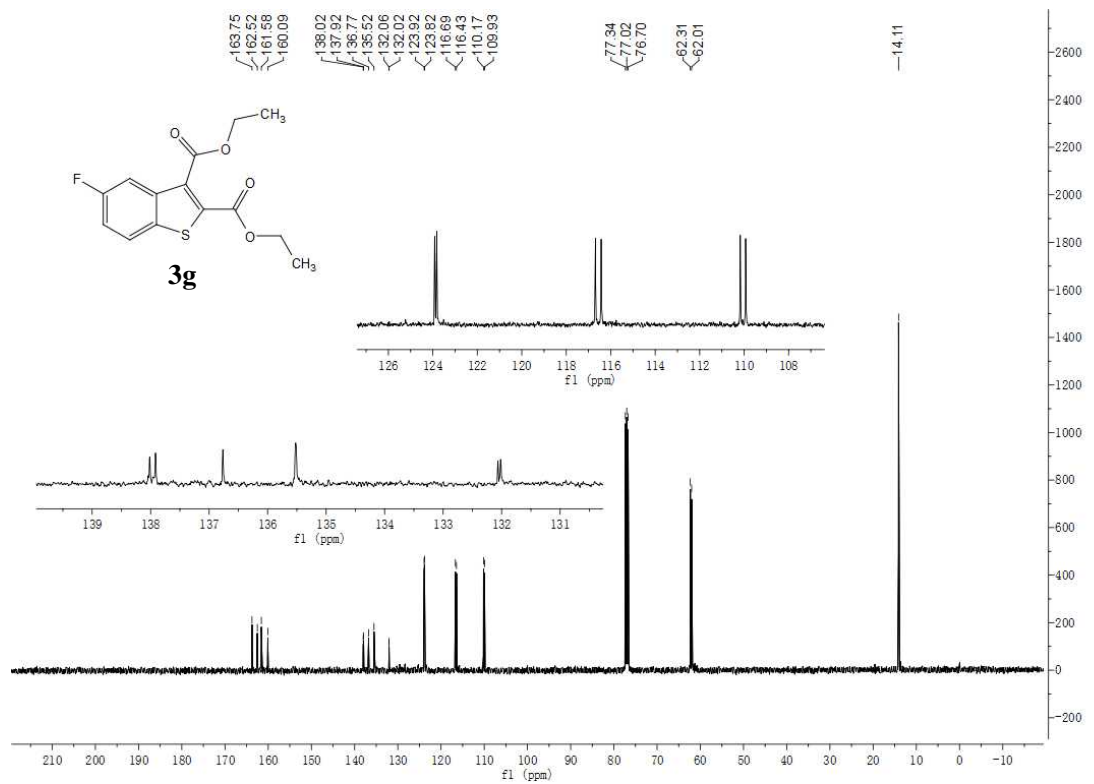

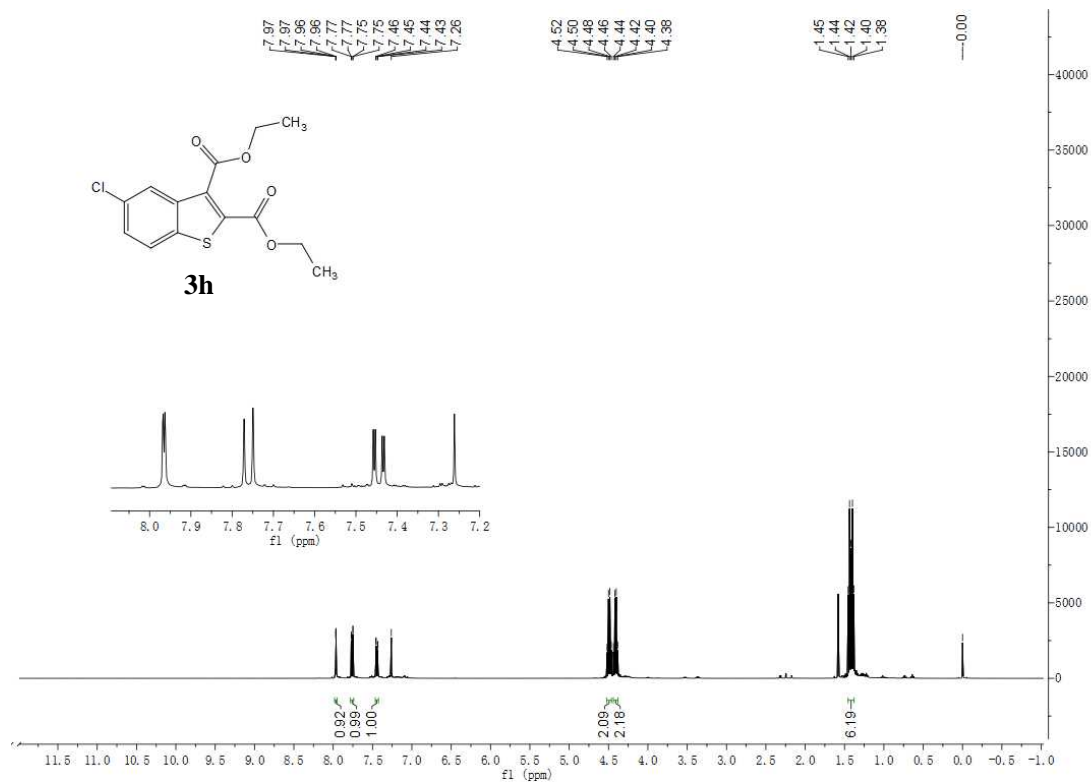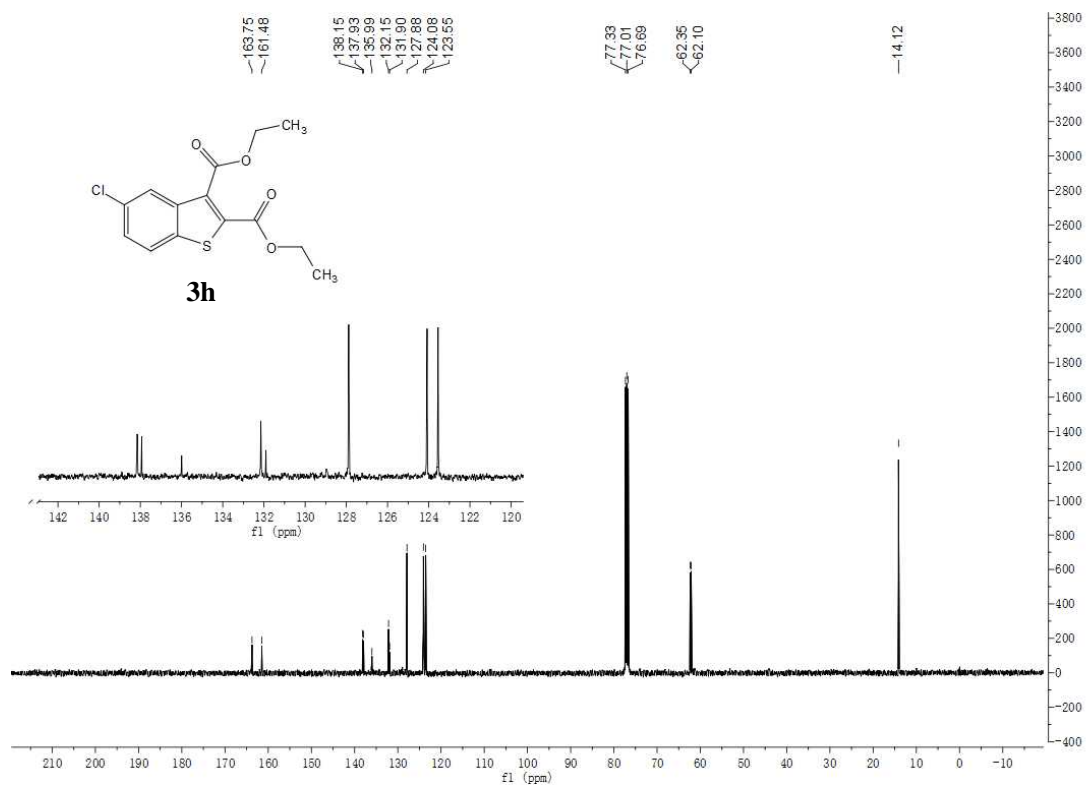

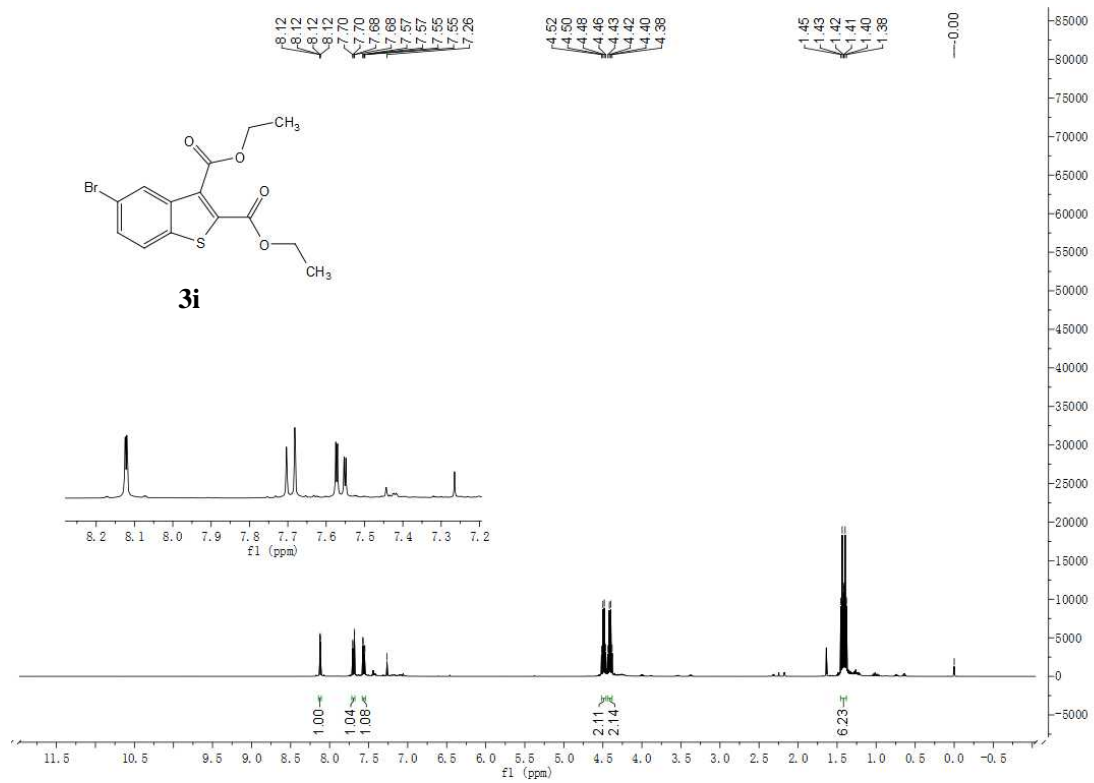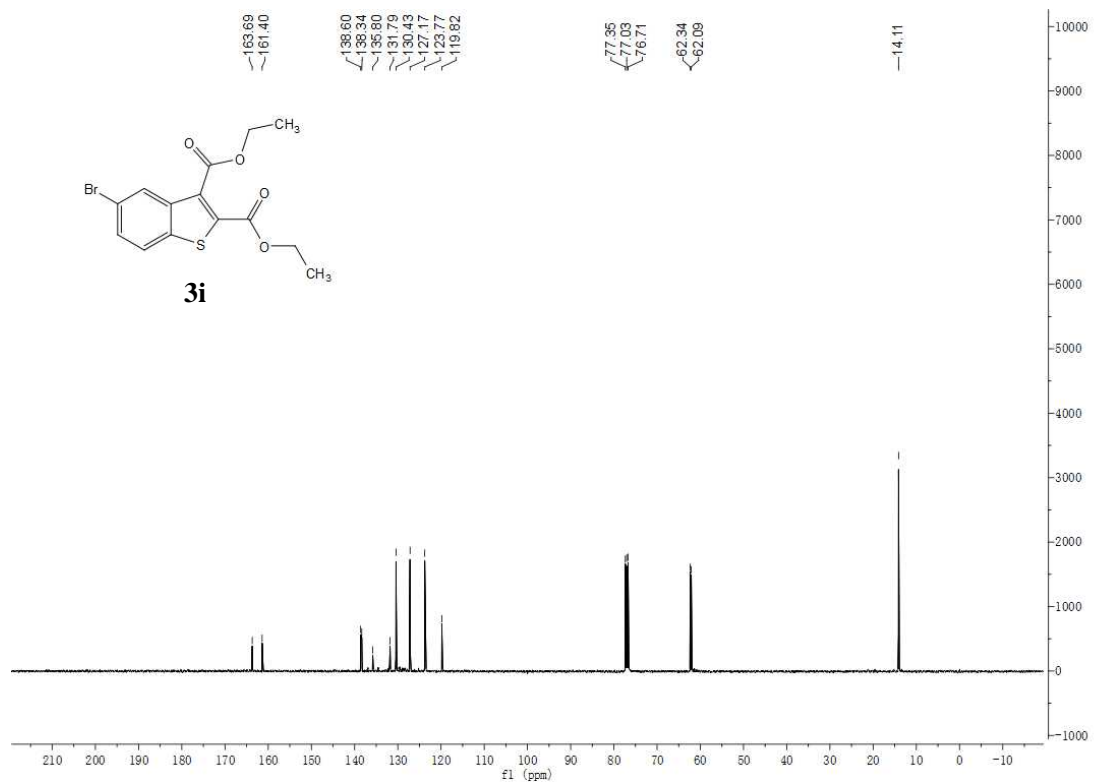

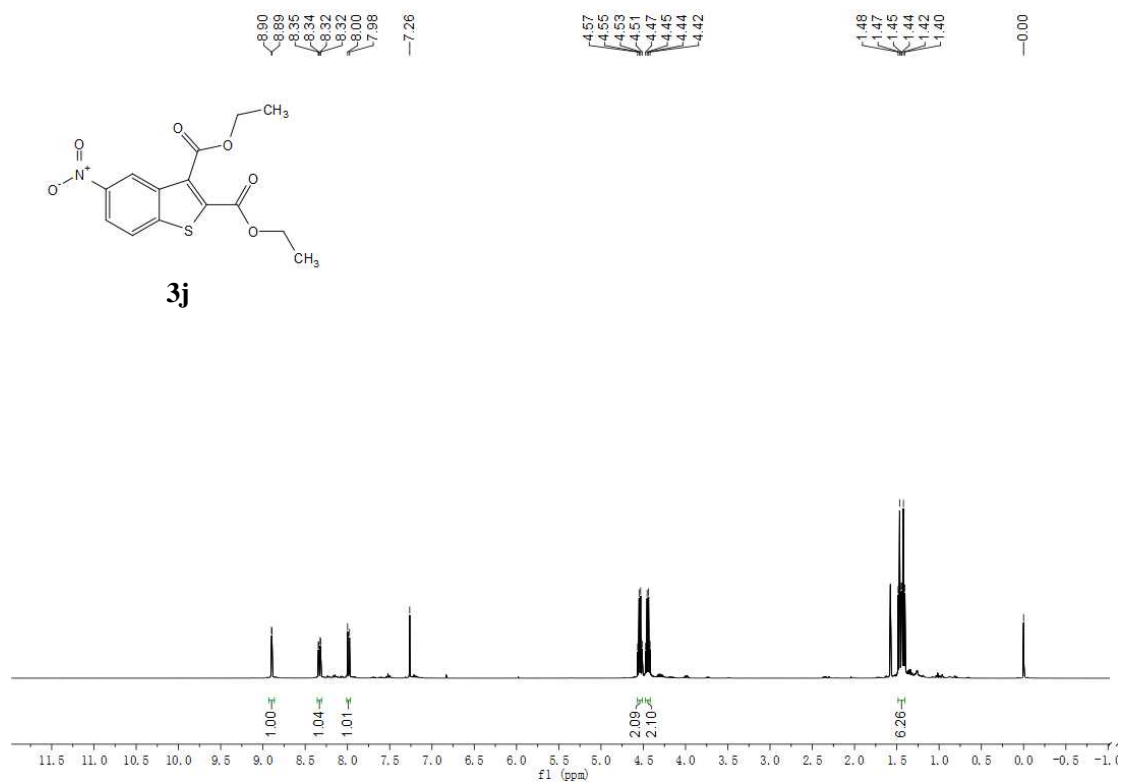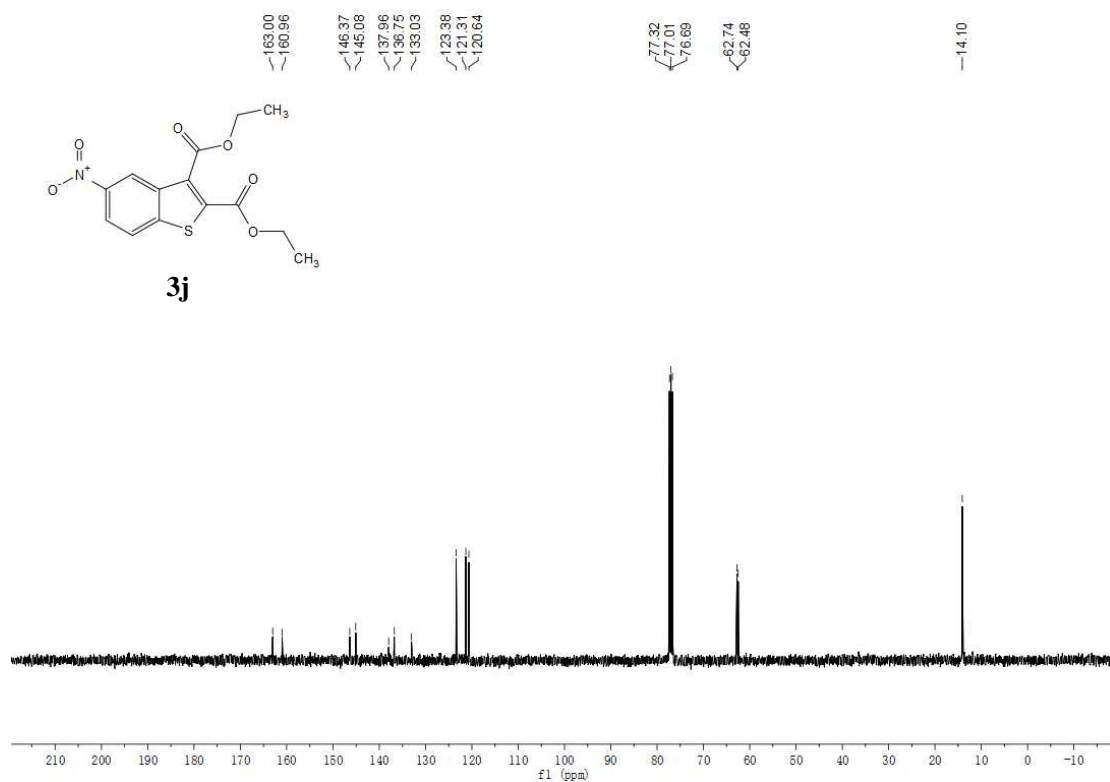

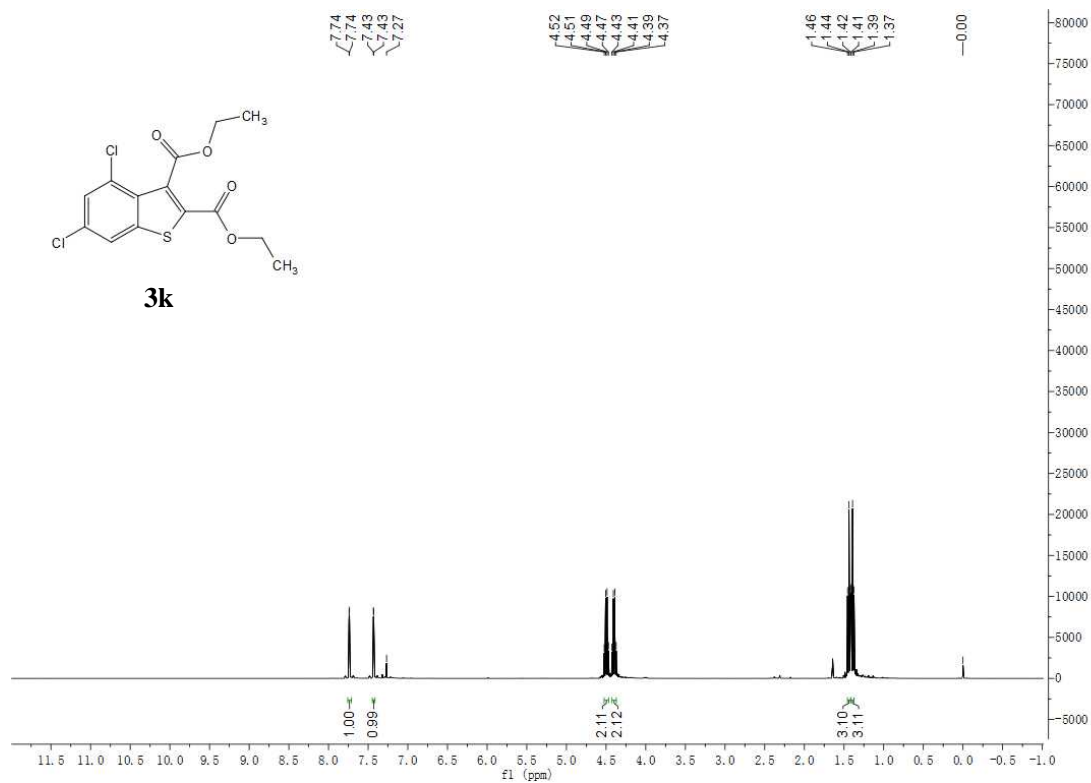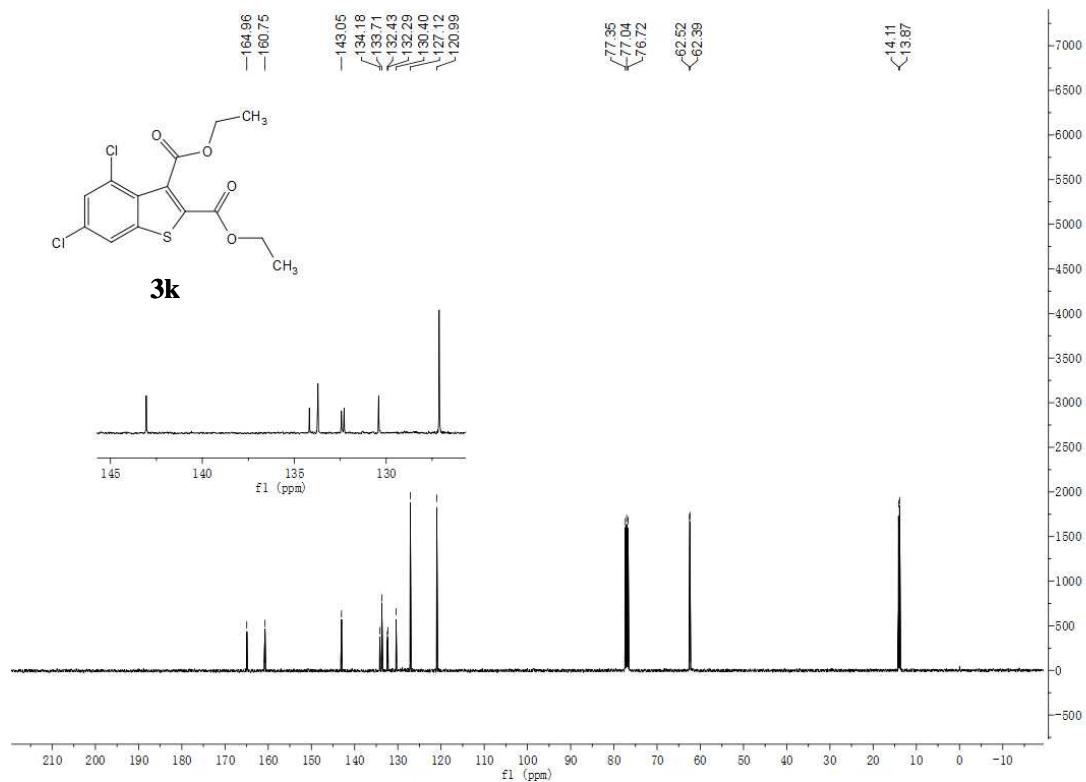



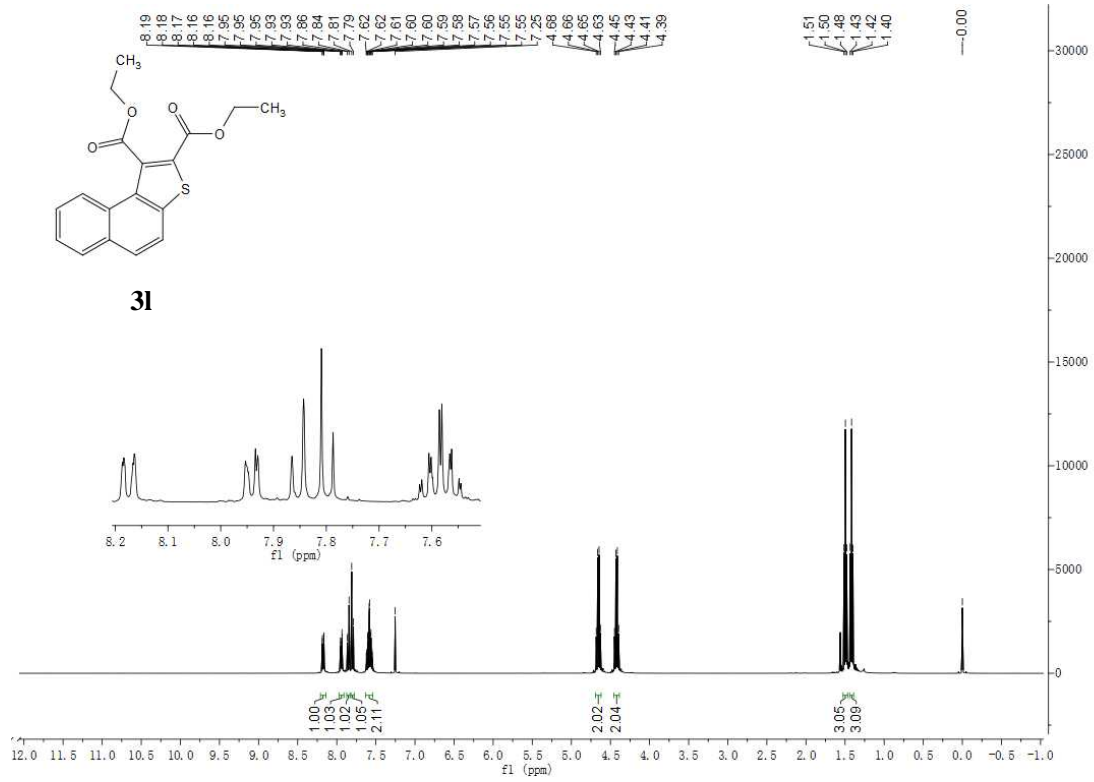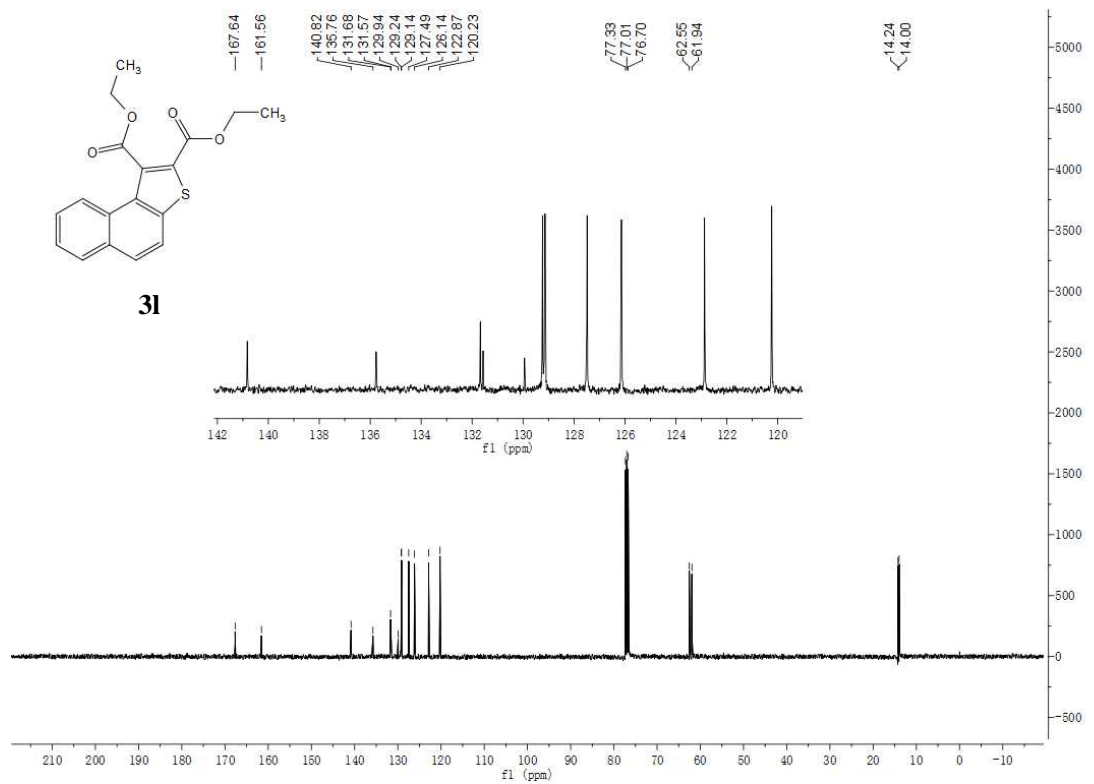

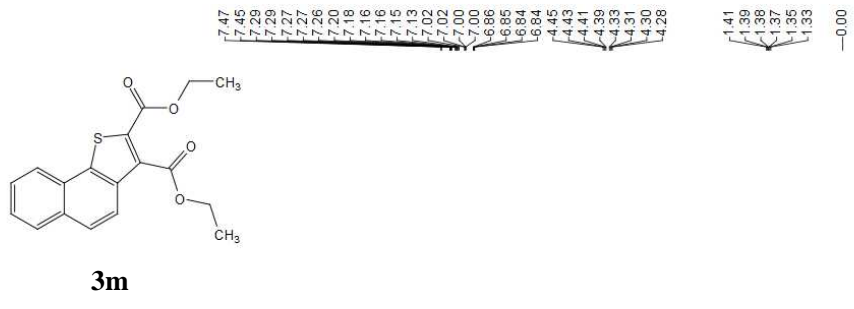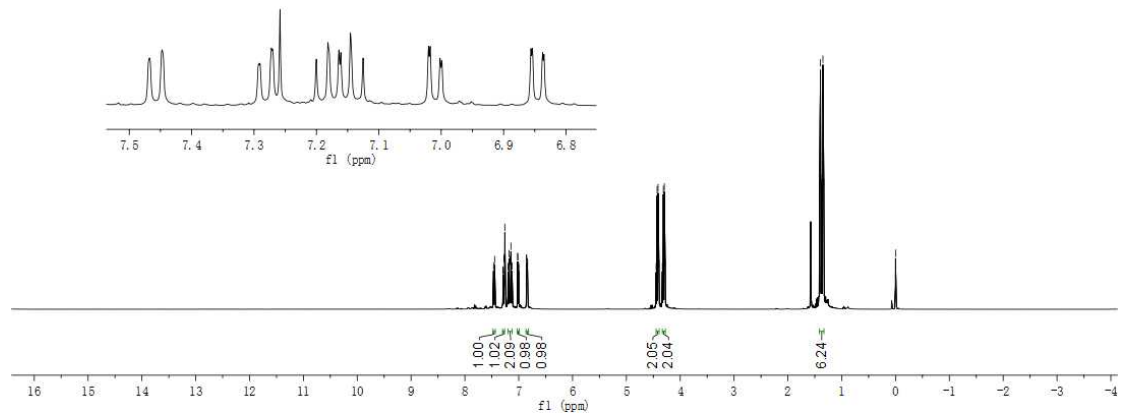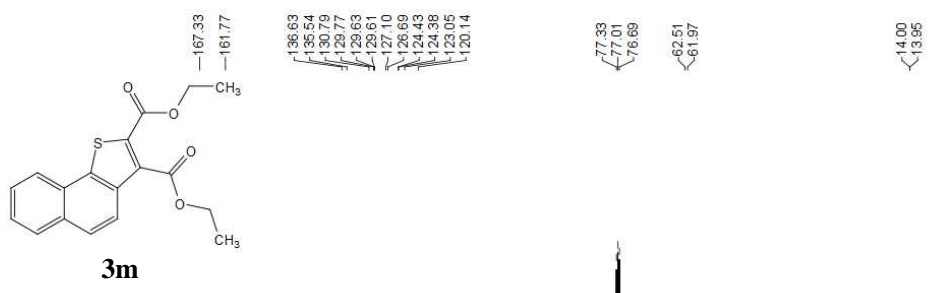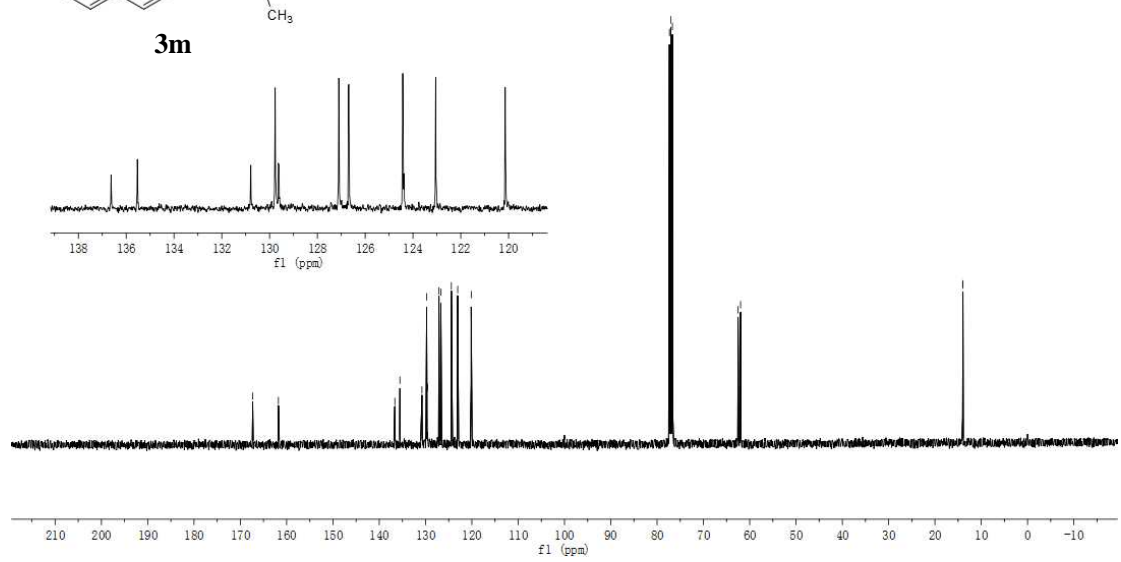

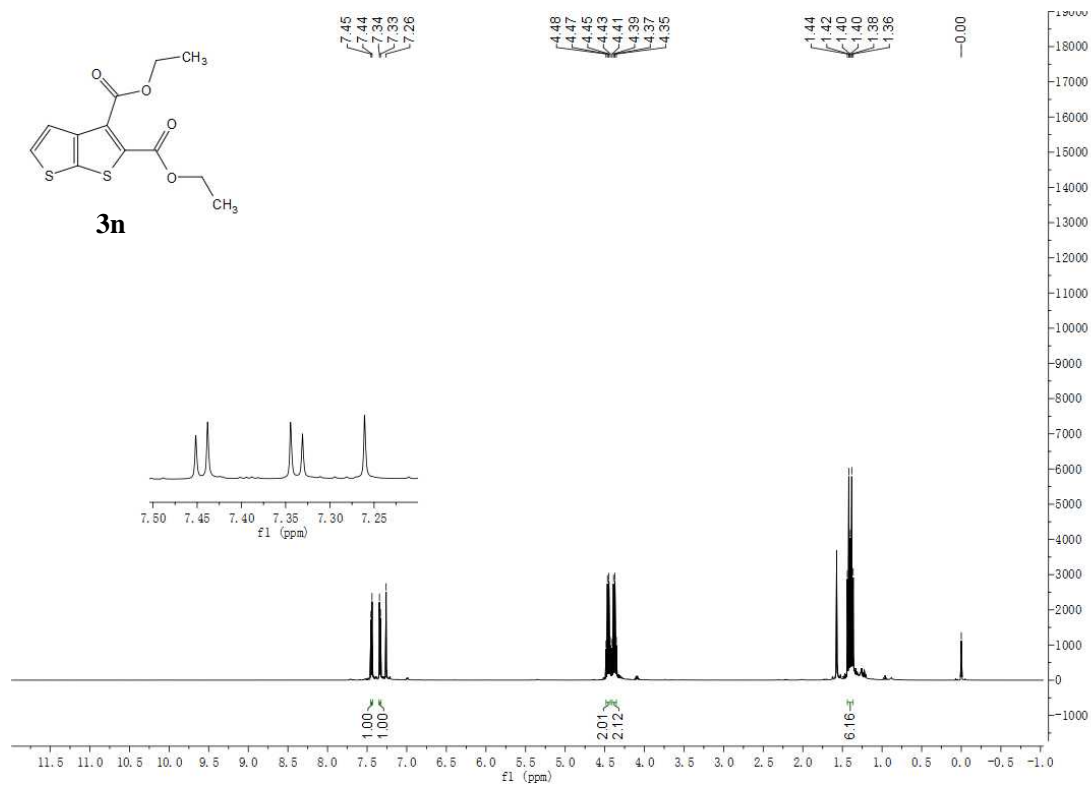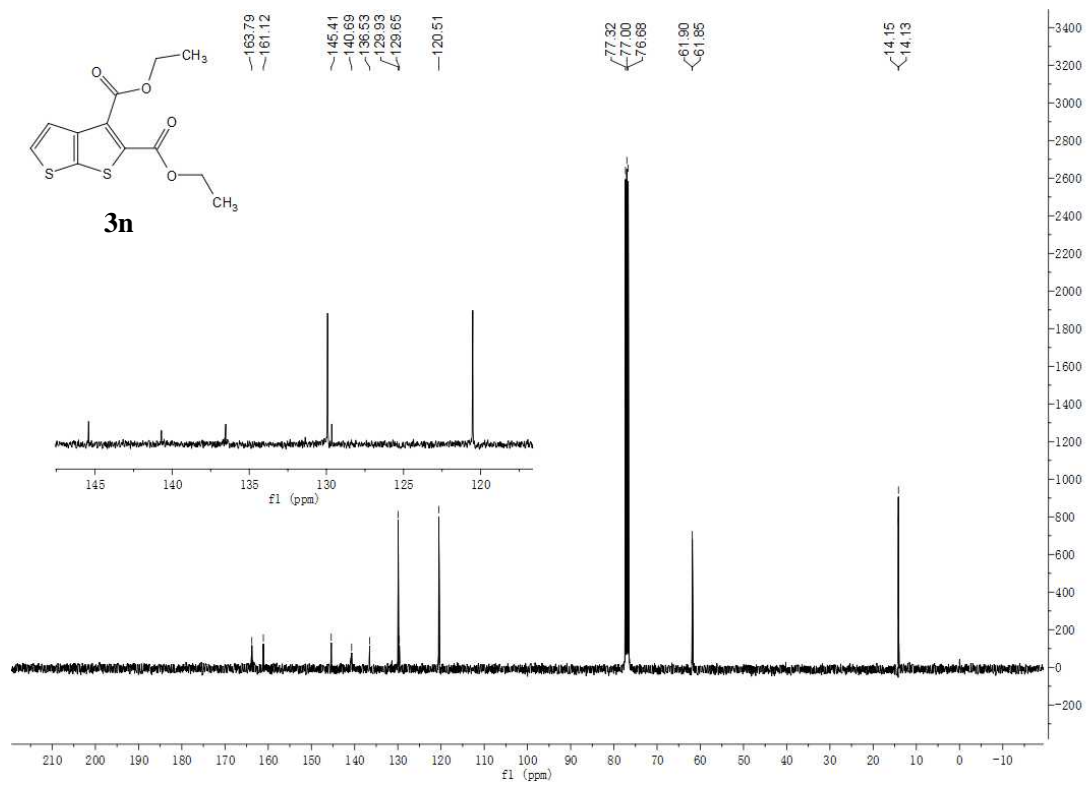

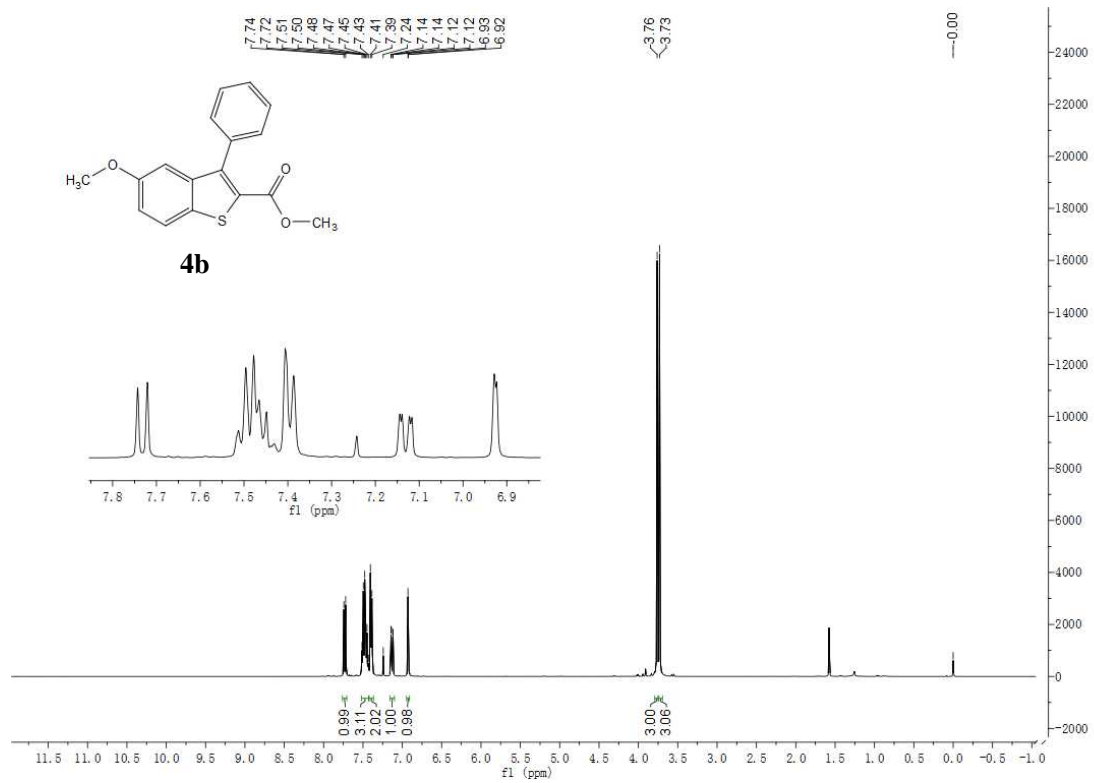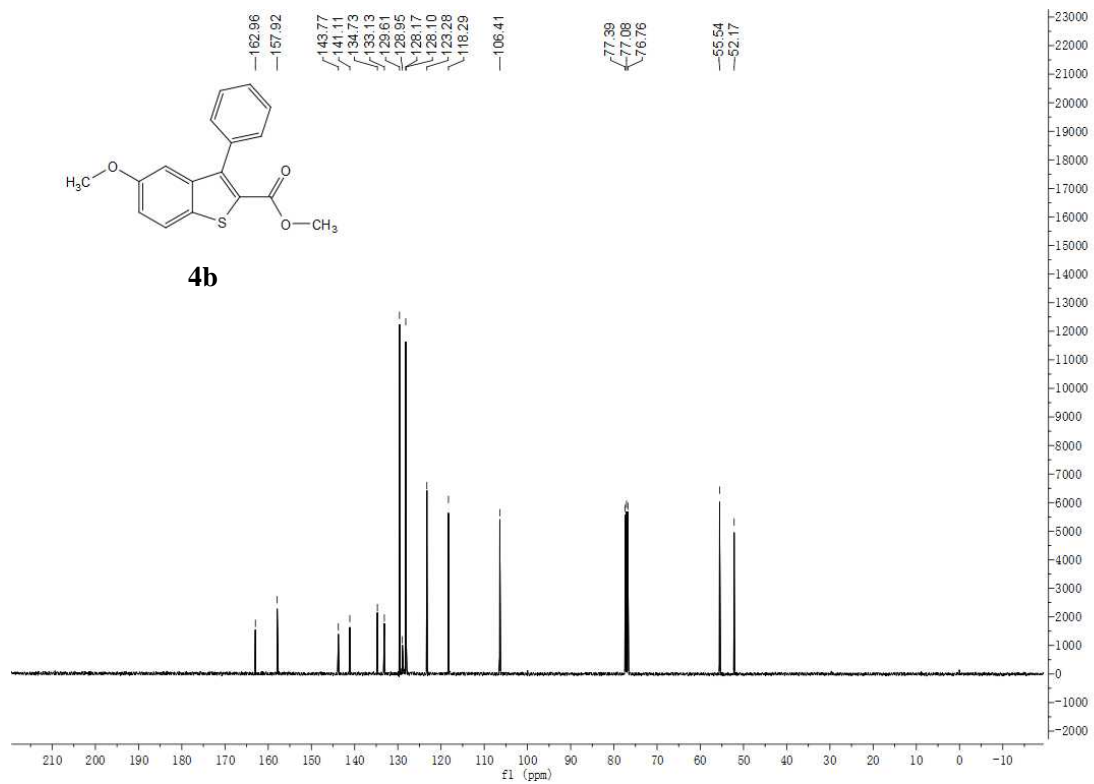

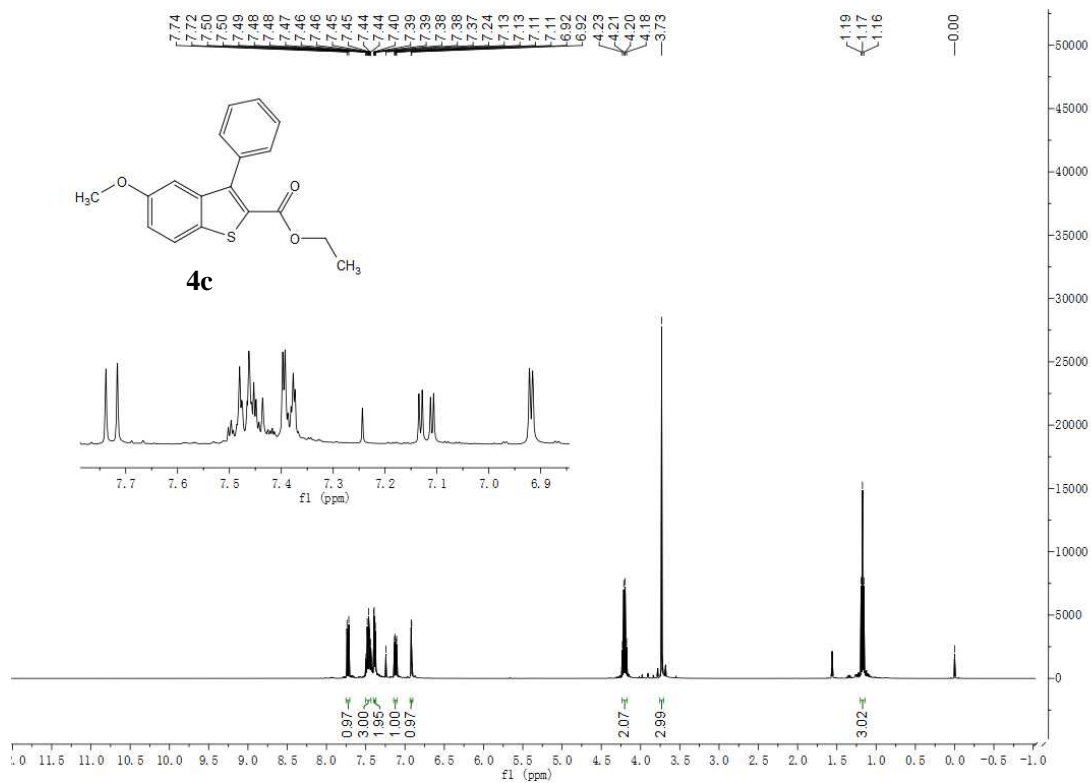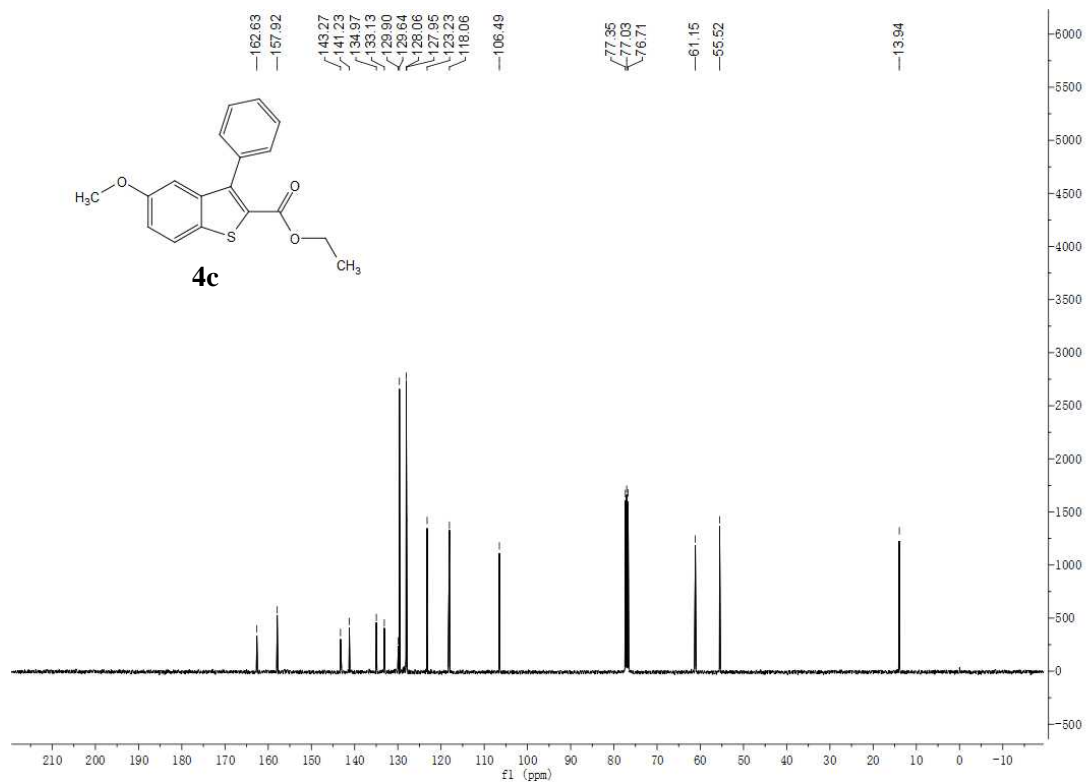

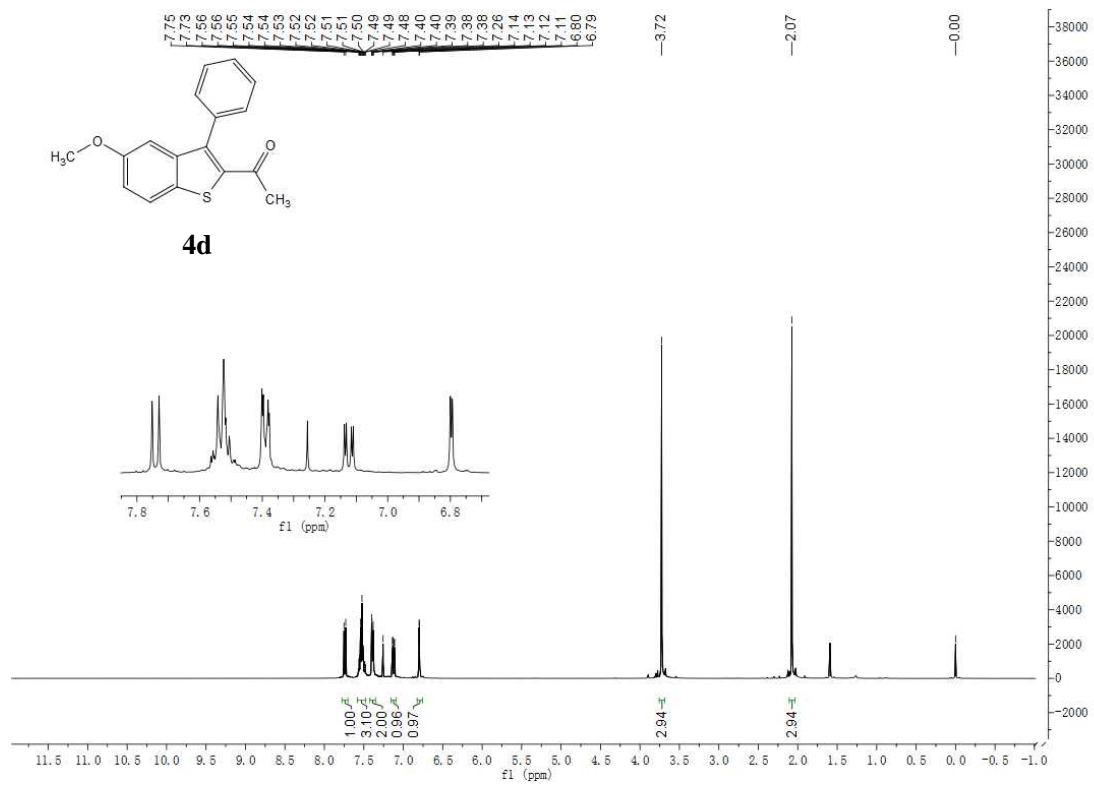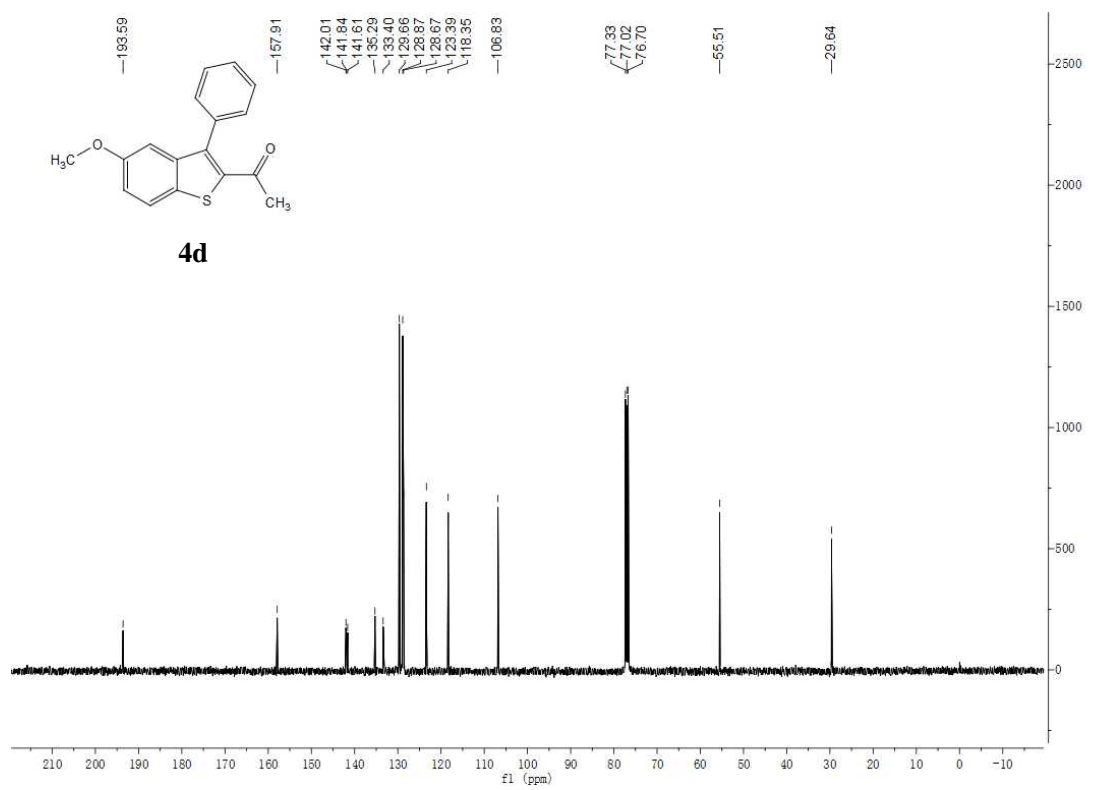

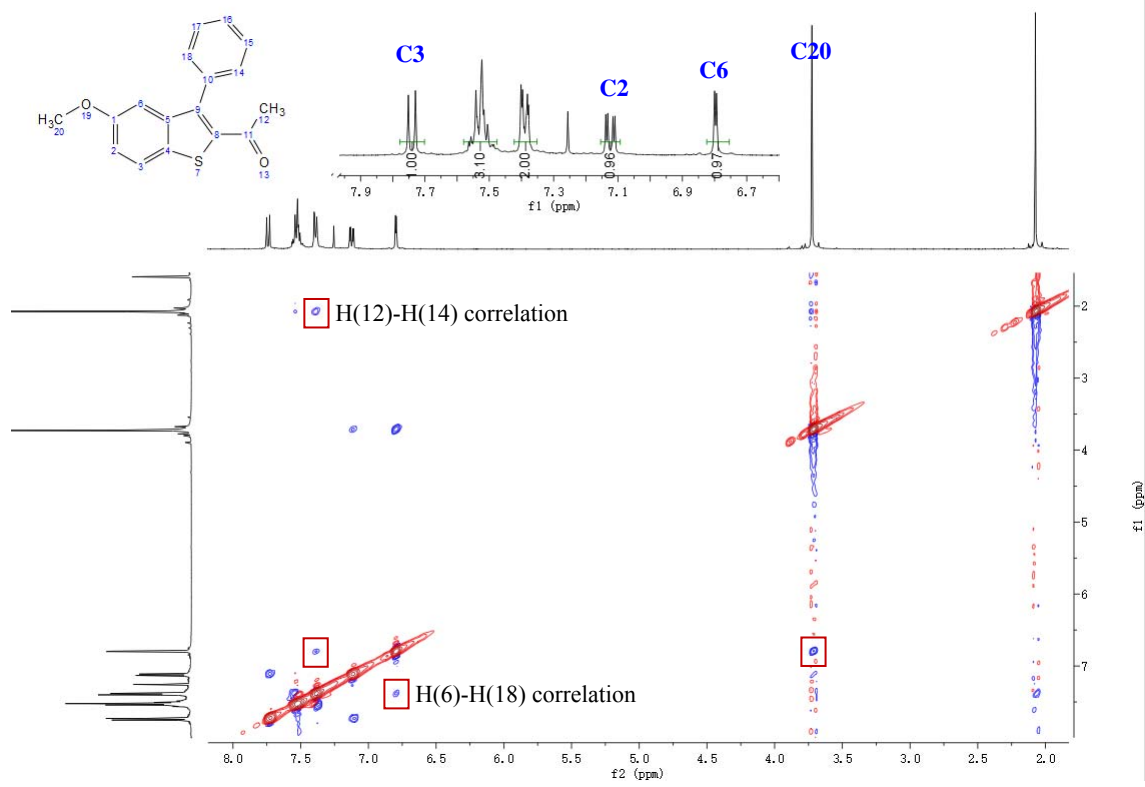

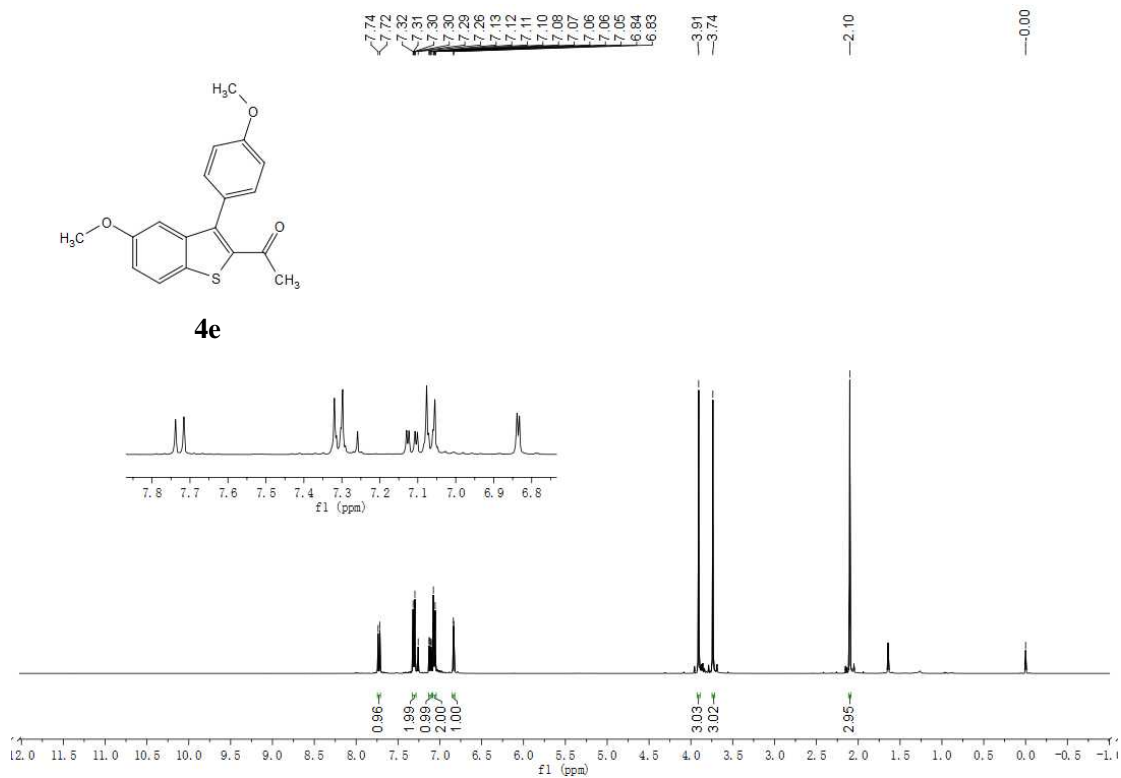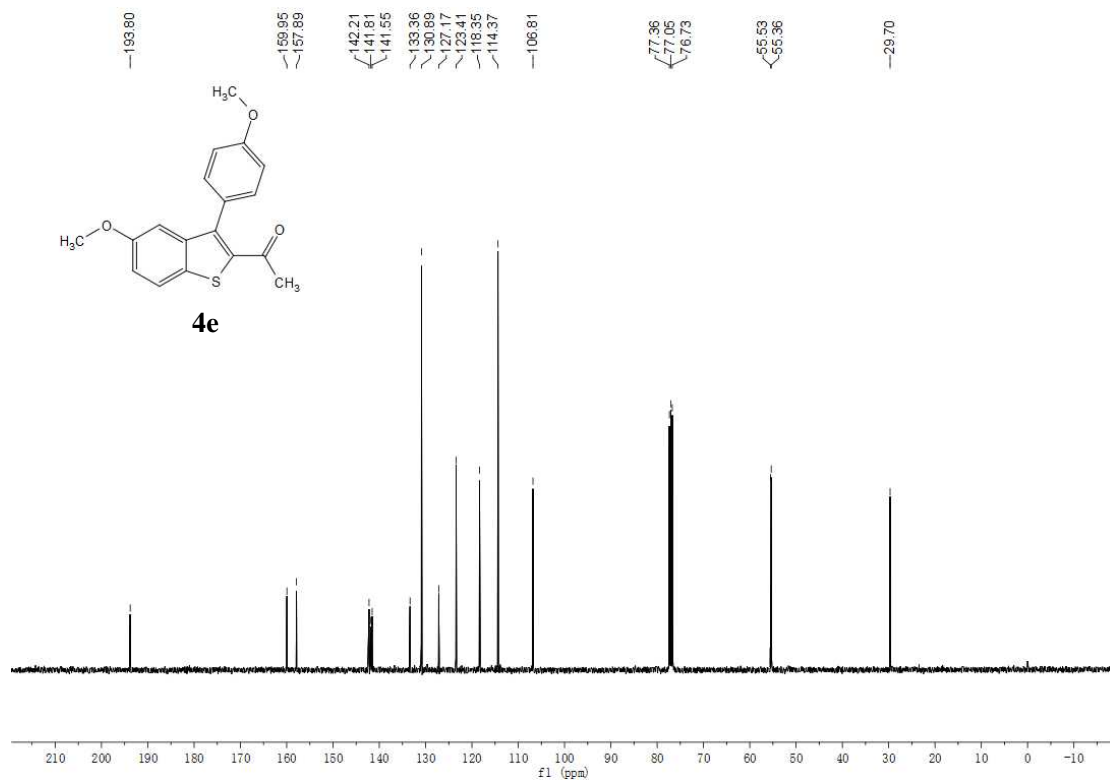



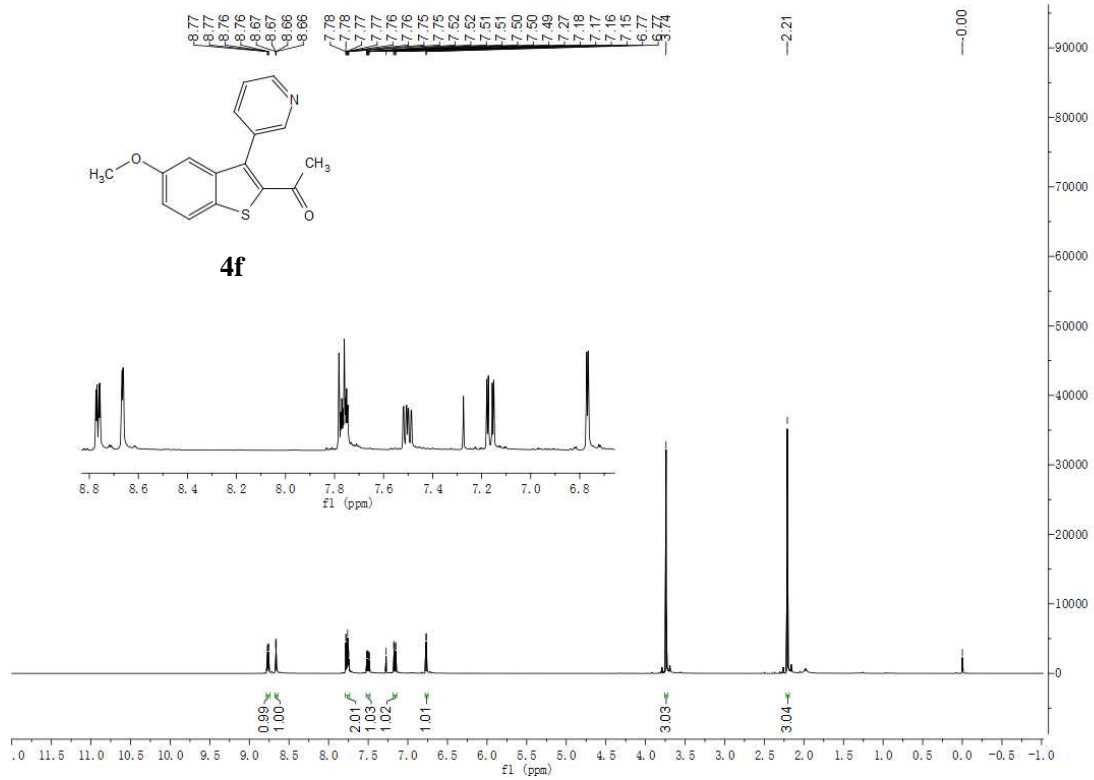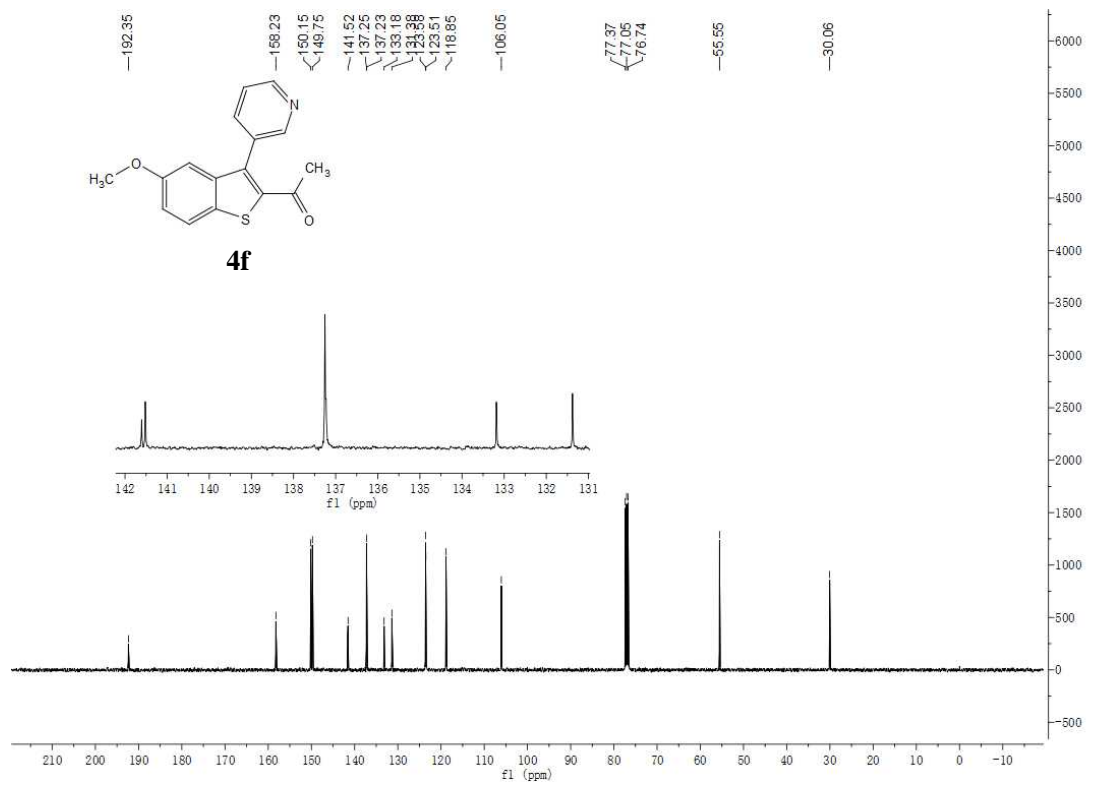

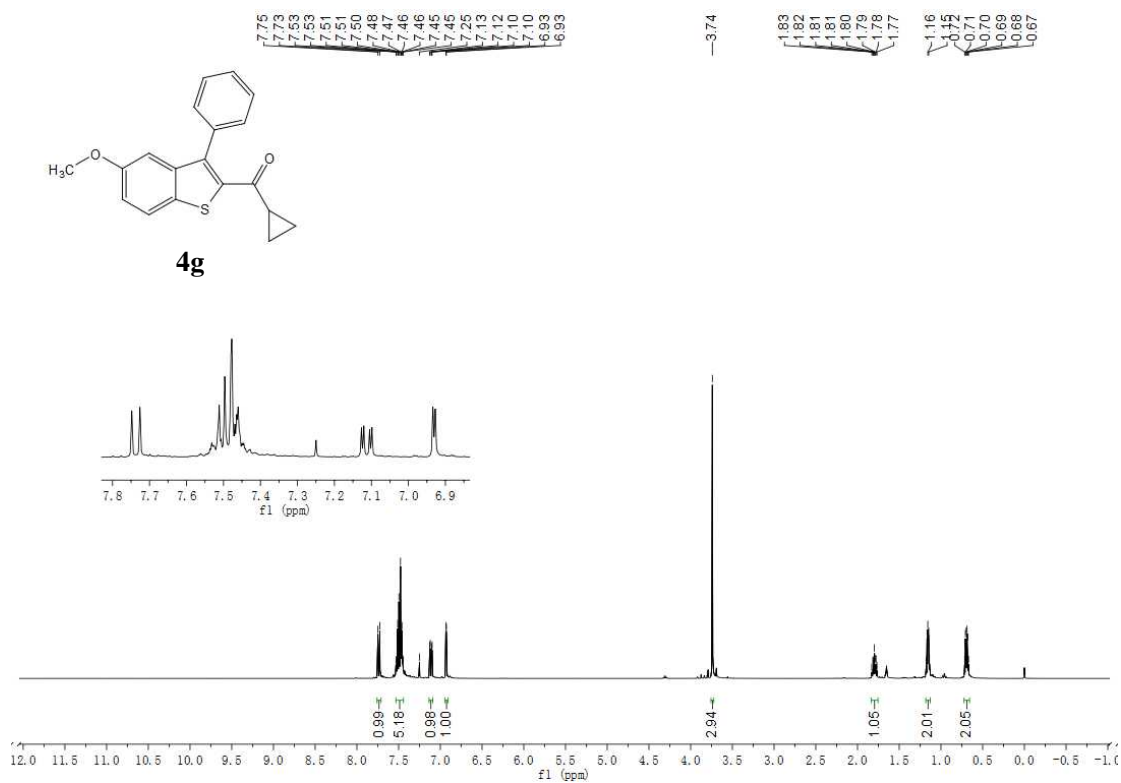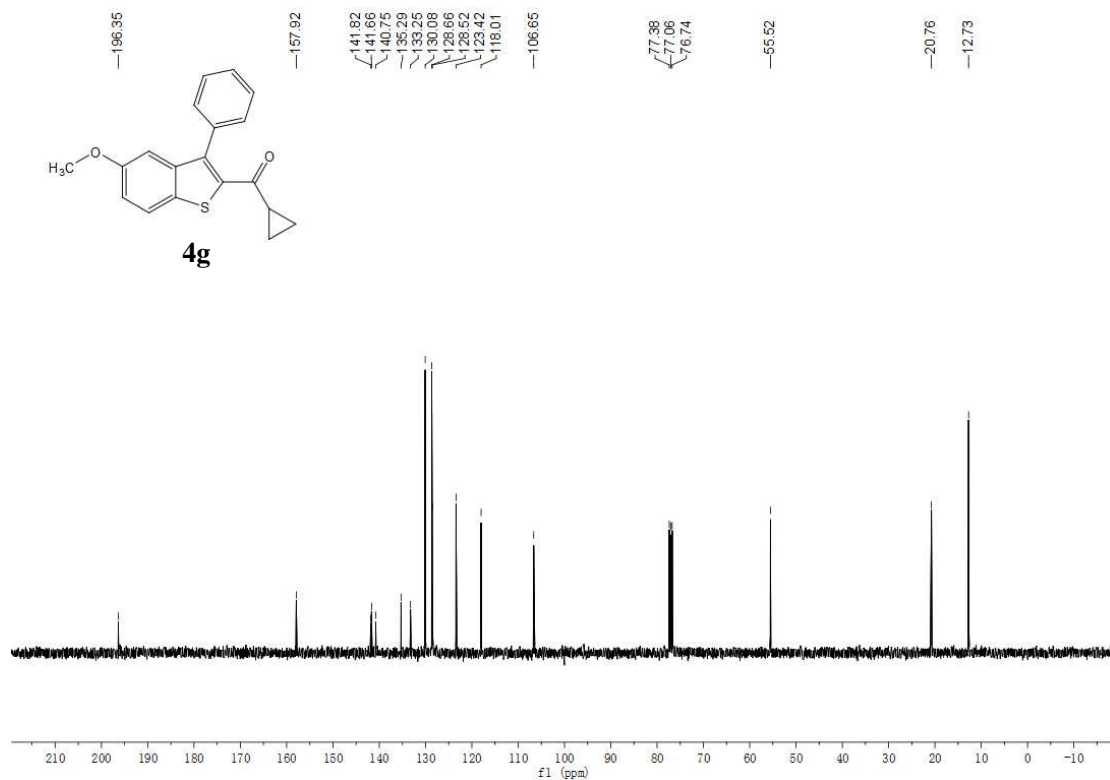

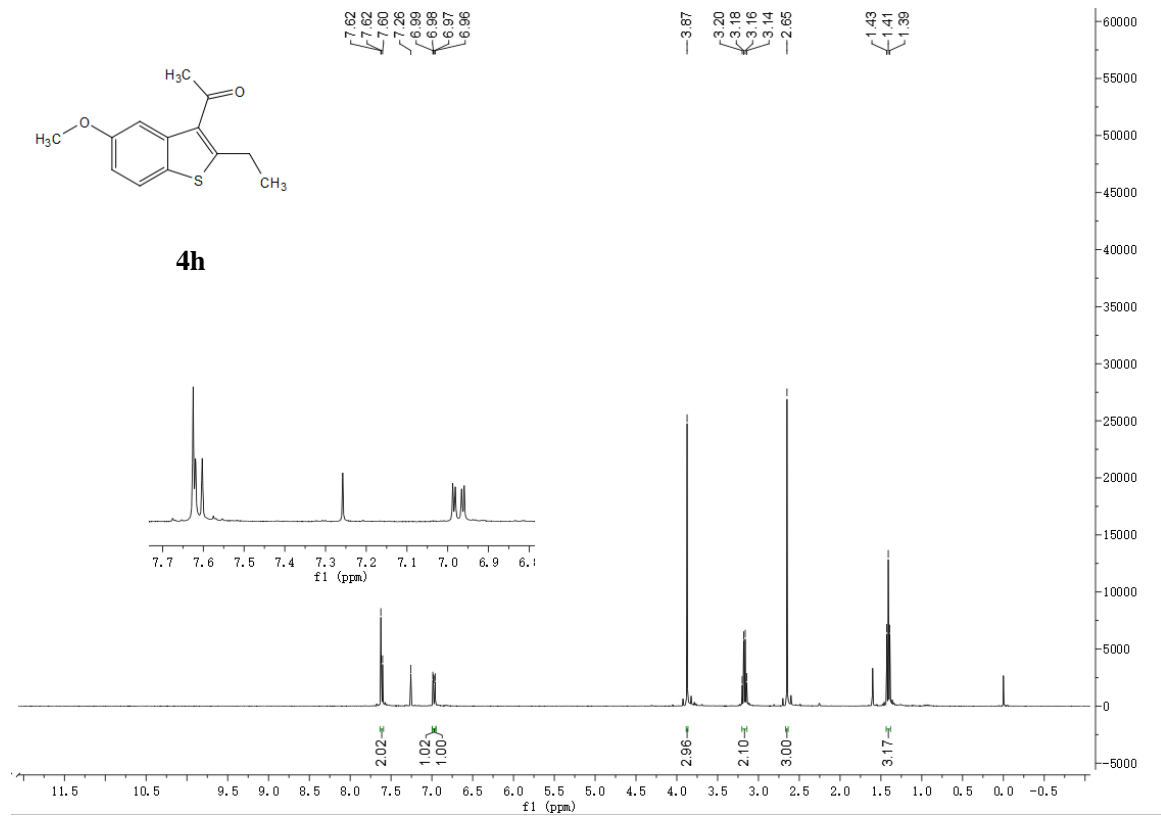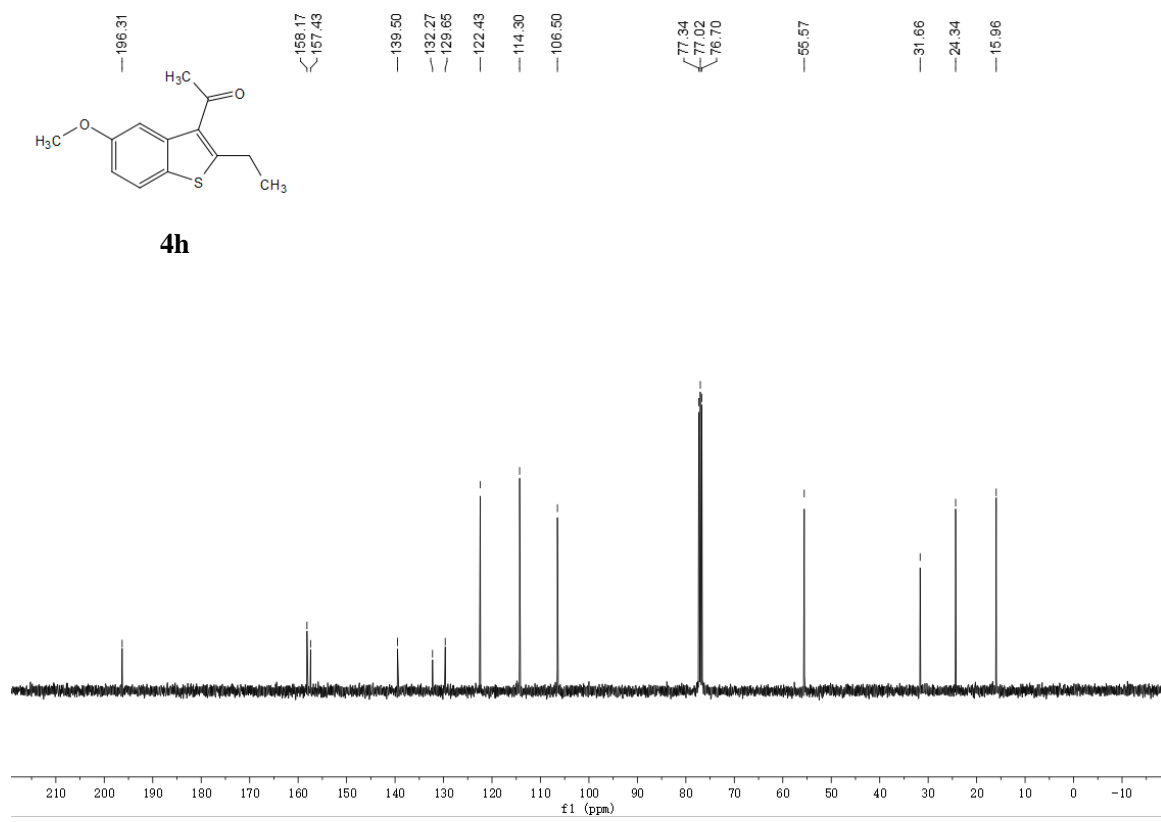

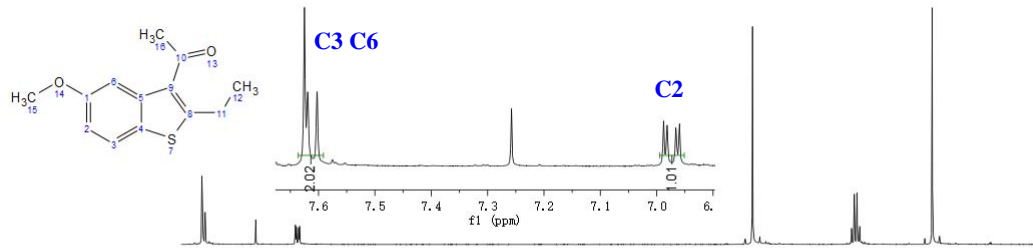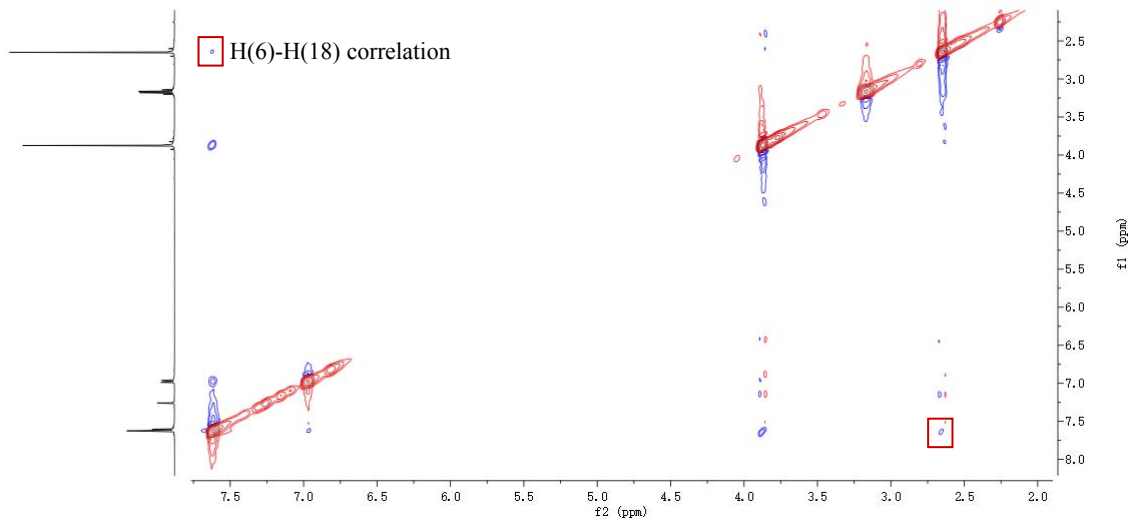

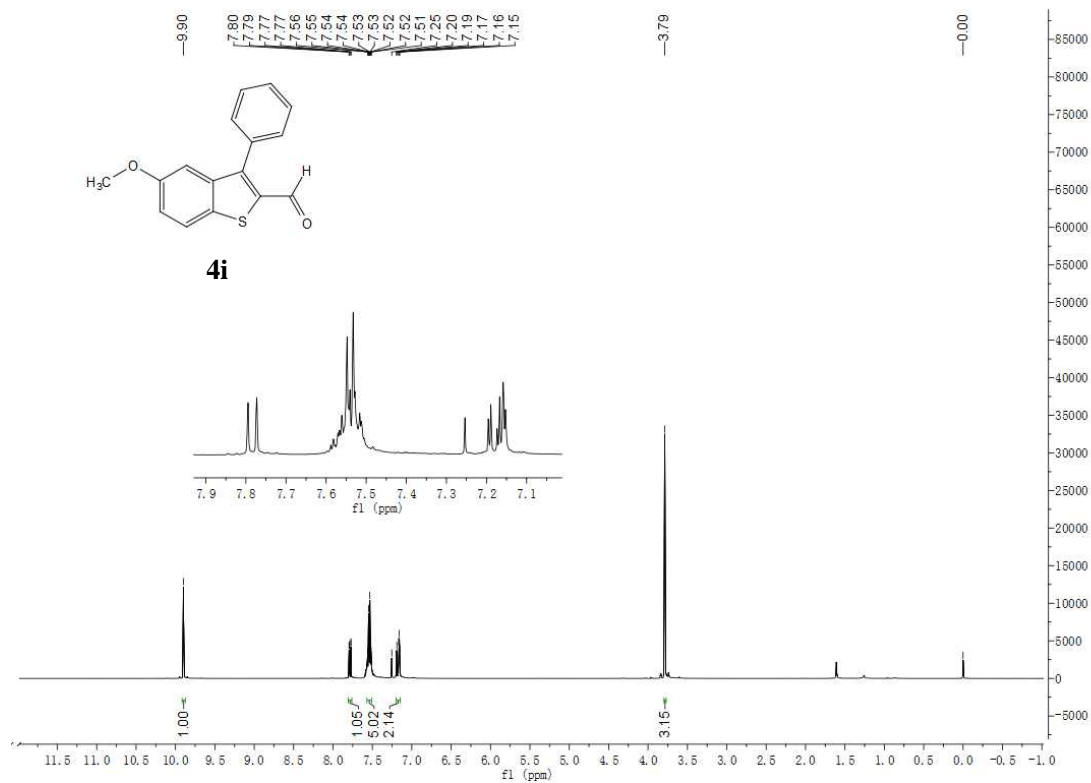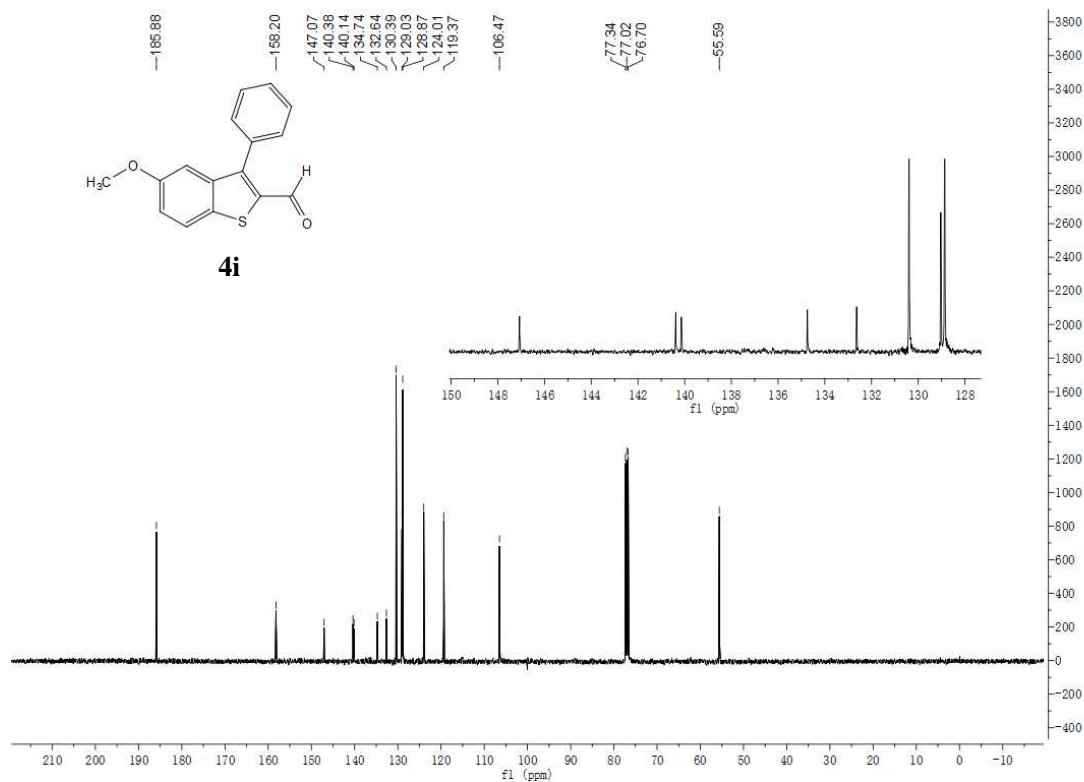

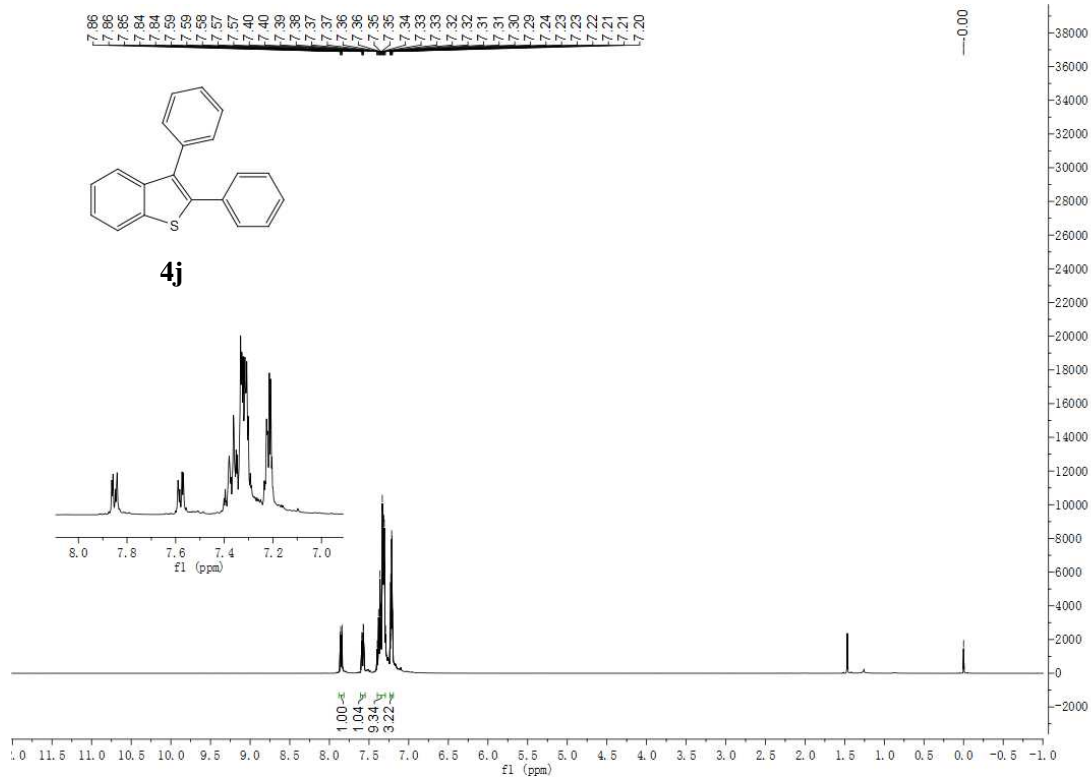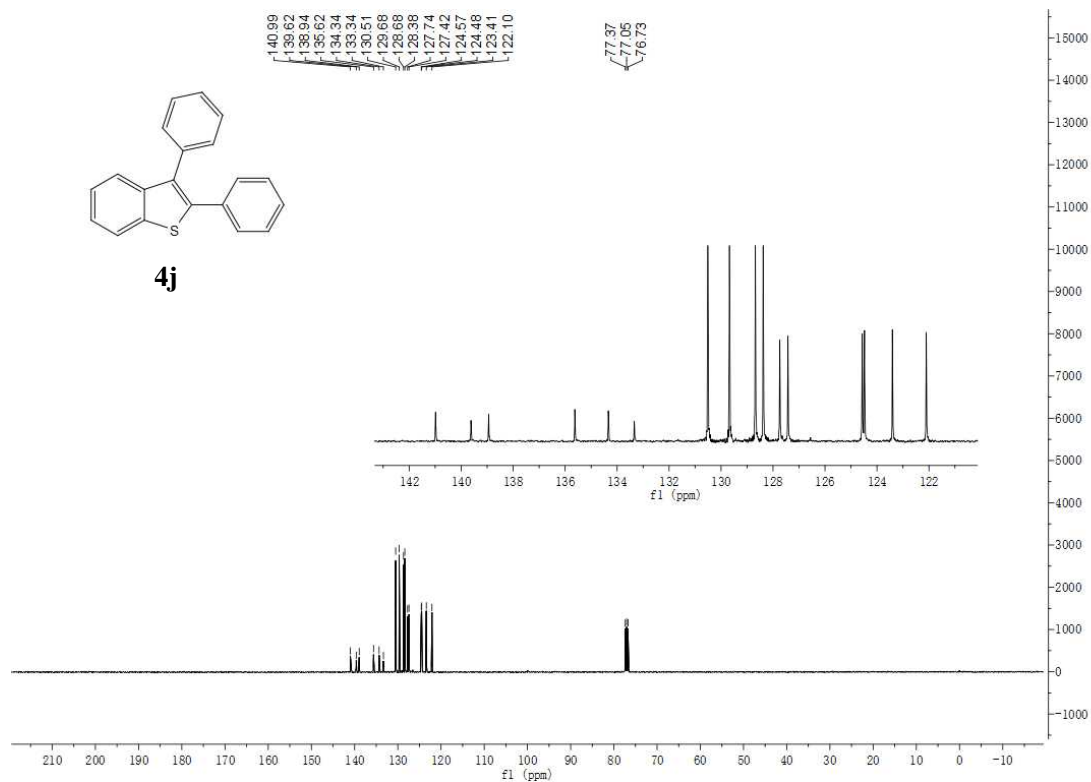

Supplement: c6ob02461k1.pdf [file c6ob02461k1.pdf]
